# Supplementary material
Source: PubMed Central journal article supplement (PMC7415571)
Supplement: NIHMS1587518-supplement-1587518_Supp_Tab1-23.pdf [file NIHMS1587518-supplement-1587518_Supp_Tab1-23.pdf]

# Supplementary Information for “Monogenic and polygenic inheritance become instruments for clonal selection”

Po-Ru Loh, Giulio Genovese, Steven A McCarroll

## Contents

|                                                                                     |           |
|-------------------------------------------------------------------------------------|-----------|
| <b>Supplementary Notes</b>                                                          | <b>2</b>  |
| <b>1 QC of mosaic chromosomal alteration calls</b>                                  | <b>2</b>  |
| 1.1 Identification of samples with possible DNA contamination . . . . .             | 2         |
| 1.2 Additional filtering of mosaic event calls . . . . .                            | 2         |
| 1.3 Estimation of true false discovery rate . . . . .                               | 3         |
| <b>2 Population structure among UK Biobank participants</b>                         | <b>4</b>  |
| <b>3 Phasing and imputation of the UK Biobank cohort</b>                            | <b>5</b>  |
| 3.1 Phasing . . . . .                                                               | 5         |
| 3.2 Benchmarking phasing accuracy using mosaic chromosomal alterations . . . . .    | 6         |
| 3.3 Imputation . . . . .                                                            | 7         |
| <b>4 Detection and calling of an inherited deletion variant in <i>MPL</i></b>       | <b>7</b>  |
| <b>5 Common variants influencing mCAs in <i>cis</i></b>                             | <b>8</b>  |
| <b>6 Inherited variants associated with mCAs in <i>trans</i></b>                    | <b>9</b>  |
| <b>7 Action of CN-LOH events on risk alleles for blood cancers</b>                  | <b>10</b> |
| <b>8 Shared genetic risk of CLL and mosaic +12 and 13q LOH</b>                      | <b>10</b> |
| <b>9 Chromosome arms with multiple overlapping CN-LOH events</b>                    | <b>12</b> |
| <b>10 Estimation of mortality risk conferred by mCAs</b>                            | <b>12</b> |
| <b>11 Additional discussion of clonal proliferation in the hematopoietic system</b> | <b>13</b> |
| <b>References</b>                                                                   | <b>15</b> |
| <b>Supplementary Tables</b>                                                         | <b>21</b> |

# Supplementary Notes

Additional supplementary figures showing detailed distributions of event calls on each chromosome are available at <https://doi.org/10.1101/653691>.

## 1 QC of mosaic chromosomal alteration calls

We called mCAs using the same approach we previously applied to the UK Biobank interim release. A full description of the method and a detailed exploration of its statistical properties is presented in the Supplementary Notes of ref. [9]. Below we describe the QC procedure we applied to mCA calls in the present analysis of the full UK Biobank data set, which included a few additional filters affecting  $<1\%$  of the call set.

### 1.1 Identification of samples with possible DNA contamination

In our previous analysis of the UK Biobank  $N=150K$  interim release, we observed that a small fraction of samples ( $<1\%$ ) exhibited evidence of possible DNA contamination based on apparent short interstitial CN-LOH calls in specific genomic regions of long-range linkage disequilibrium; we therefore used these likely-artifactual calls to flag samples for exclusion [9]. We applied the same QC approach to the full UK Biobank data set, identifying a total of 4,074 individuals to exclude based on short interstitial CN-LOH calls in the five regions we previously identified (chr3:~45Mb, chr6:~30Mb, chr8:~45Mb, chr10:~80Mb, chr17:~40Mb). As in our previous analysis, we also excluded individuals with three or more interstitial CN-LOH calls (a mostly-overlapping set of 534 individuals, bringing the total for exclusion to 4,100), and we excluded an additional 7 individuals with three or more calls with high implied switch error rates [9]. Finally, we added a filter excluding an additional 4 individuals based on having eight or more calls all within a very narrow BAF and LRR range ( $\max |\Delta\text{BAF}| < 0.03$ , LRR range  $< 0.04$ ), again indicating possible DNA contamination [6]. Together, these criteria resulted in 4,111 exclusions.

### 1.2 Additional filtering of mosaic event calls

Beyond the sample exclusions described above, we also performed QC on our mosaic event call set to filter calls that were unlikely to be true mosaic events (but did not suggest sample contamination, and hence did not require excluding samples from analysis). As in our previous analysis of the  $N=150K$  interim data set, our main post-processing step excluded events that might be constitutional (rather than mosaic) duplications [9]. As before, we filtered subchromosomal events of length  $>10\text{Mb}$  with  $\text{LRR} > 0.35$  or with  $\text{LRR} > 0.2$  and  $|\Delta\text{BAF}| > 0.16$ , and we filtered events of length  $<10\text{Mb}$  with  $\text{LRR} > 0.2$  or with  $\text{LRR} > 0.1$  and  $|\Delta\text{BAF}| > 0.1$ . We chose these thresholds

conservatively based on visual inspection of LRR and BAF distributions, in which likely constitutional duplications formed well-defined clusters (Extended Data Fig. 2e). (Most constitutional duplications were already masked in a pre-processing step involving a separate HMM [9].) We also added a filter for possible constitutional deletions based on  $LRR < -0.5$  and heterozygosity rate  $< 1/3$  the expected rate within called event regions. (Constitutional deletions generally lead to genomic segments devoid of heterozygous sites, but occasionally heterozygous calls are erroneously made within the deletion regions, leading to the appearance of a large allelic imbalance. This behavior is easy to detect as it causes very low LRR and very low het rate within an event call.)

Additionally, we added filters for 29 event calls with  $LRR > 0.2$  and het rate  $> 1.2x$  expected,  $LRR > 0.1$  and het rate  $> 1.5x$  expected, or  $LRR > -0.05$  and het rate  $> 2x$  expected. Such event calls with elevated heterozygosity can arise from segmental duplications involving three distinct haplotypes or from genotype calling errors in which rare homozygotes are called as heterozygotes. Finally, we added a filter for 7 short interstitial events called at the *SNRPN* locus on chr15 between 24–25.5Mb. This locus is imprinted and exhibits differential replication timing between the paternal and the maternal haplotype [55]. Because a blood sample contains a fraction of replicating cells, an imbalance between maternal and paternal allelic fractions at this locus can sometimes be observed in genotype array data (without actual mosaicism).

### 1.3 Estimation of true false discovery rate

Our procedure for calling the existence of a mosaic event involved identifying significant autocorrelation in phased BAF deviations using a likelihood ratio test statistic [9]. We calibrated these test statistics empirically using a permutation-based procedure (phase randomization) to obtain a nominal 5% false discovery rate (FDR) threshold. However, this permutation-based 5% FDR threshold assumed that the only source of autocorrelation in phased BAF is a true mosaic event. In reality, other sources of autocorrelation exist; in particular, we found that sample contamination produced autocorrelation in regions of long-range LD (resulting in unusual false positive calls that we subsequently filtered). While we believe that our filtering eliminated most samples affected by spurious autocorrelation, our true FDR is likely to be slightly larger than 5% due to residual artifacts.

Fortunately, we can estimate our true FDR by leveraging the fact that true-positive events should be observed more frequently in the genomes of older people, while false-positive calls (which have no relation to age) should be observed in individuals whose age distribution matches that of the study population. This observation allows us to estimate FDR by comparing the age distributions of the highest-confidence calls (17,061 calls passing a permutation-based FDR of 1%) vs. medium-confidence calls (2,571 additional calls passing a permutation-based FDR of 5% when combined with the high-confidence calls, but failing the 1% threshold). The medium-confidence call set is expected to have a false positive rate of  $\approx 32\%$  based on the permutation-based FDRs—

meaning that its age distribution is expected to be an 68:32 mixture of (i) the age distribution of high-confidence calls and (ii) the age distribution of the study population. That is, the age distribution of medium-confidence calls should relax toward the age distribution of the overall study due to the inclusion of false positives—which is precisely what we see (Extended Data Fig. 2e). (The figure also includes low-confidence calls at FDR 10% for additional context, although we did not analyze these calls.)

Upon fitting the age distribution of medium-confidence calls as a mixture of the age distribution of high-confidence calls and the overall study distribution, the regression fit gives mixture proportions of  $\approx 56:44$  rather than 68:32, implying a true FDR of 6.6% (4.5–8.6%, 95% CI) when combined with the high-confidence calls—slightly higher than the permutation-based FDR of 5%, as expected. We note that this estimate is contingent on two assumptions: (i) the high-confidence call set predominantly contains true positives (which is supported by the observation that changing the high-confidence FDR threshold from 1% to 0.1% results in a near-identical “gold standard” age distribution; and (ii) the true positives in the high-confidence and medium-confidence call set have the same age distribution. While we acknowledge that these assumptions are imperfect, this analysis gives good evidence that our FDR is well-controlled. (We also note that while we cannot completely rule out the possibility that our FDR is higher than we estimated, the key results of our paper are robust to higher FDRs than estimated; e.g., we would only expect a higher-than-estimated FDR to weaken GWAS associations and decrease effect sizes.)

## 2 Population structure among UK Biobank participants

The large majority of UK Biobank participants are of European ancestry: 94% reported “White” ethnic background (88% British, 3% Irish, and 3% other White). Self-reported ethnic background in UK Biobank was previously demonstrated to very closely match genetically-defined ancestry based on principal components [10]; e.g., in a plot of the first two principal components, which separate European, African, and East Asian ancestries, nearly all self-reported White individuals cluster in the European upper-left corner of the plot (Extended Data Fig. 3). Consistent with this observation, we previously demonstrated that restricting to self-reported White individuals adequately addressed population stratification in standard association analysis pipelines (specifically, linear mixed model analysis or linear regression with principal component covariates on unrelated individuals [47]). However, given that our analyses here focus on rare variants, we took additional care to ensure that our results were not confounded by residual population structure.

Three lines of evidence indicated that residual population structure had not produced false positives in our results:

1. Quantile-quantile plots for our association results exhibited no deviation from the null distribution outside of the seven monogenic risk loci we identified (Extended Data Fig. 4).

2. Every risk variant (52 out of 52) that associated with acquisition of CN-LOH events in cis exhibited the expected direction of allelic bias toward removal of the risk allele (for *MPL*) or duplication of the risk allele (for *FH*, *NBN*, *MRE11*, *ATM*, *SH2B3*, and *TM2D3*) (Supplementary Table 7). In contrast, variants spuriously associated with mosaic CN-LOH events (e.g., due to uncorrected population stratification) would be randomly deleted or duplicated by CN-LOH events.
3. Individuals identified in our exome analyses (of self-reported White individuals with mosaic CN-LOH events) as carriers of rare coding or splice variants in frequently-targeted genes all clustered in the European corner of the PC plot (Extended Data Fig. 3).

Based on the above analyses, we concluded that self-reported White ethnic background was a sufficiently accurate indication of European ancestry for our analyses.

### 3 Phasing and imputation of the UK Biobank cohort

#### 3.1 Phasing

The UK Biobank cohort was previously phased using SHAPEIT3 [10, 56]; however, to improve phasing accuracy [17, 18] and to expand the set of phased variants, we rephased the data set using Eagle2 [18], employing a multiple-run voting strategy [57] to optimize accuracy. The SHAPEIT3-phasing performed by UK Biobank included 670,739 autosomal markers present on both the BiLEVE and Biobank arrays that passed the following filters: (a) failed QC in at most 1 genotyping batch, (b) missingness  $<0.05$ , (c)  $MAF < 0.0001$  [10]. We performed five runs of phasing using Eagle2 on five distinct marker sets:

1. The same set of autosomal markers previously phased using SHAPEIT3.
2. A subset of 650,084 autosomal markers obtained by further excluding  $MAF < 0.001$  variants.
3. A separate set of 706,877 autosomal markers present on the Biobank array (but not necessarily the BiLEVE array) passing the following four filters: (i) allele frequency deviation  $<0.02$  between the Biobank and BiLEVE arrays (for markers present on both the Biobank and BiLEVE array); (ii) missingness  $<0.15$ ; (iii) either (iii-a)  $MAF > 0.001$  and passing filters used in SHAPEIT3 phasing, or (iii-b)  $MAF < 0.001$ ; (iv) Hardy-Weinberg disequilibrium  $P > 10^{-100}$  (according to `plink` [38]).
4. A larger set of 712,138 autosomal markers obtained using the same four filters as above, but relaxing the Hardy-Weinberg threshold to  $P > 10^{-200}$ .

5. A larger set of 714,468 autosomal markers obtained using the same four filters as above, but relaxing the Hardy-Weinberg threshold to  $P > 4.9 \times 10^{-324}$  (the smallest representable double-precision floating point value).

In each phasing run, we ran Eagle2 (v2.3.5) on 105 overlapping chunks of  $\sim 10,000$  markers (with overlaps of at least 2,000 markers between consecutive chunks on the same autosome); on very large data sets, this partition-ligation approach improves Eagle2’s accuracy because Eagle2 conditions on a fixed set of `--Kpbwt` haplotypes per individual within an input region. We set `--Kpbwt` to 100,000 for the first two runs and 80,000 for the remaining three runs, and we used the `--pbwtOnly` option to only use PBWT iterations [18].

We combined phasing results from the five Eagle2 runs (covering a total of 716,197 unique markers) using a voting approach [57], reasoning that phase switch errors incurred during different Eagle2 runs were likely to be partially independent. Specifically, we scanned through the phased haplotypes in order of genomic position, and at each successive variant, we set the phase of each heterozygous genotype by giving 7 votes to each phasing run containing the variant. These 7 votes were distributed among the most recently processed 7 hets from the run: each het voted according to the relative phase (estimated by Eagle2) between that het and the het currently under consideration. We implemented this approach to improve robustness against short 1–2 SNP “blips” that constitute a large fraction of phase switch errors in large data sets [17]; our goal was to maximize long-range phasing accuracy.

### 3.2 Benchmarking phasing accuracy using mosaic chromosomal alterations

We benchmarked the long-range phasing accuracy of our Eagle2-phased haplotypes as well as the SHAPEIT3-phased haplotypes provided by UK Biobank using a novel benchmarking method based on mosaic chromosomal alterations. The standard approach to benchmarking phasing accuracy is to analyze a data set that contains trios, comparing gold-standard trio phase to statistical phase estimated on trio children after removing trio parents. However, in this case, we were interested in comparing our accuracy to the accuracy of the existing SHAPEIT3 phasing [10], which had been already been performed on all individuals together (such that trio phase accuracy should be very high [58] and uninformative of phasing accuracy on unrelated individuals).

To overcome this challenge, we instead obtained gold standard phasing information from individuals who carried mosaic chr12 trisomies (the most common whole-chromosome mosaic event). Mosaic events produce allelic imbalances that provide information about phase within genotyping intensity data (i.e., BAF deviations) that is invisible within the genotype calls available to phasing algorithms. To apply this approach, we ran our hidden Markov model-based mCA detection algorithm using either Eagle2-estimated phase or SHAPEIT3-estimated phase, and we compared the numbers of phase switch errors in each data set detected by the HMM. We restricted our attention to 79 individuals with chr12 trisomies with  $|\Delta\text{BAF}|$  in the range 0.02–0.05 (high enough that

switch errors are easily detectable, but low enough for the mosaicism not to compromise genotype calling accuracy).

Across these benchmark chromosomes, we observed that the SHAPEIT3 phasing achieved a long-range switch error rate of 0.060% (s.e.m. 0.005%), whereas our Eagle2 phasing (voting across five runs) achieved a long-range switch error rate of 0.027% (s.e.m. 0.004%), an improvement of  $>2x$ . Applying the same approach to benchmark the individual Eagle2 phasing runs showed that the voting approach achieved a  $\sim 20\%$  improvement in accuracy compared to each of the individual runs. We note that these benchmarks ignore small-scale phase switch errors (e.g., 1–2 SNP blips) that will be attributed by the HMM to measurement noise in BAF.

### 3.3 Imputation

The UK Biobank genetic data was previously imputed to  $\sim 93$  million autosomal variants [10] using the Haplotype Reference Consortium (HRC) panel [59] and a merge of the the UK10K and 1000 Genomes Phase 3 reference panels [60]. We augmented this imputed data set by further imputing very rare coding or splice variants contained on the BiLEVE array (used to genotyped 49,950 individuals [36]) but not on the Biobank array (used to genotype the remaining  $\sim 90\%$  of the cohort). To impute these variants to the remainder of the cohort, we first pre-phased the BiLEVE cohort using Eagle2 with `--Kpbwt=20000` using the same partition-ligation scheme we applied to the full cohort (105 overlapping chunks of  $\sim 10,000$  autosomal markers; Sec. 3.1). We imputed the BiLEVE-only variants into the full cohort using Minimac3 v2.0.1 [37].

We adopted a similar strategy to impute very rare variants from genic regions captured in exome sequencing of 49,960 UK Biobank participants [22] into the full cohort. We performed phasing and imputation on genotype calls from the SPB exome sequencing pipeline. We dropped singleton variants, phased the remaining exome-sequencing-derived variants together with variants genotyped on the UK Biobank array (using Eagle2 with `--Kpbwt=20000`), and imputed into the full cohort (using Minimac4 v1.0.1, with noncoding variants from the UK Biobank array used as an imputation scaffold).

We also re-imputed chromosomes with detected mCAs in order to obtain phase information at imputed variants, as the imputed data supplied in the UK Biobank imputation v3 release did not contain phase information. We performed this imputation using Minimac3 with the merged UK10K and 1000 Genomes Phase 3 reference panels.

## 4 Detection and calling of an inherited deletion variant in *MPL*

We discovered the inherited 454bp deletion variant associated with 1p CN-LOH by exploring genotyping intensities of carriers of the rs144279563 tag SNP [9]. We observed an unusual deviation in the total allelic intensities (LRR) for these carriers at four sites typed on the UK BiLEVE chip

(used to genotype  $\sim 10\%$  of the cohort): an increase in LRR for a probe at chromosome 1 base position 43,814,653 (hg19) and a decrease in LRR at 43,814,938, 43,814,963, and 43,814,979 (Extended Data Fig. 5a,b). Based on LRR at these four probes, we called 27 likely carriers of the structural variant among the 49,950 UK BiLEVE participants (Extended Data Fig. 5c).

Only the first probe (at base position 43,814,653) was included on the Biobank chip (used to genotype the remaining  $\sim 90\%$  of the cohort), so to call the structural variant in the remaining samples, we employed a hybrid approach using both LRR at 43,814,653 and imputation. First, we phased the structural variant in the UK BiLEVE cohort using Eagle2 [18] and imputed it into the remainder of the cohort using Minimac3 [37]. We then re-weighted the imputed allele probabilities for each individual according to the odds of observing the measured LRR at 43,814,653 assuming the individual was a carrier vs. non-carrier of the structural variant. We estimated these odds based on the empirical distribution of LRR among high-confidence carriers (imputed probability  $>0.99$ ) vs. high-confidence non-carriers (imputed probability  $<0.01$ ). This re-weighting modified the calls of 16 individuals and produced a final call set of 203 likely carriers of the structural variant in the full cohort.

Upon the release of exome sequencing data for 49,960 UK Biobank participants [22], we examined exome sequencing reads aligning to the region of *MPL* affected by the structural variant in individuals we had predicted to be carriers of the variant. We observed clear read support for a 454bp deletion removing base pairs 43,814,729 through 43,815,182 (spanning *MPL* exon 10): read pairs spanning this region exhibited unusually long insert sizes and clipped alignments (Extended Data Fig. 5d), and read depth in exon 10 was unusually low in all 32 predicted carriers of the structural variant who had been exome-sequenced (Extended Data Fig. 5e,f). Interestingly, we found no evidence of a duplication around 43,814,653 in exon 9 (Extended Data Fig. 5d–f, despite our earlier observation that carriers of the structural variant exhibited consistently high genotyping intensities (LRR) at this site (Extended Data Fig. 5a,b)). Based on the lack of read support for a duplication in exon 9, we believe the structural variant consists only of the 454bp deletion; the increase in LRR from genotyping at 43,814,653 could be a technical artifact arising from the probe being only 76bp away from the deletion.

## 5 Common variants influencing mCAs in *cis*

Our initial genotype–phenotype association analyses were well-powered to detect rare variants with large effects on *cis* CN-LOH mosaicism but were underpowered to detect weaker effects of more-common variants. To maximize power to detect common variants associated with CN-LOH mosaicism in *cis*, we performed a second genome-wide association analysis using a combined test for (i) association with CN-LOH events and (ii) allelic bias of CN-LOH directionality (i.e., tendency of CN-LOH events in hets to consistently duplicate vs. delete the risk allele; Methods). For



common variants, test (ii) can provide greater signal than (i): while a small fraction of individuals have CN-LOH events on a given chromosome arm (limiting the contribution of (i)), a large fraction of cases are heterozygous (allowing substantial signal from (ii)).

This test revealed two novel associations between common variants at the *TCL1A* and *DLK1* loci on 14q and acquired 14q CN-LOH mutations (Fisher’s combined  $P=4.2\times 10^{-9}$  and  $3.6\times 10^{-9}$ ; Supplementary Table 12). Intriguingly, the reference alleles at both loci were recently observed to increase risk of mosaic Y chromosome loss in elderly males, a trait related to cell proliferation and cell cycle regulation [27, 61]. Here, 14q CN-LOH mutations in heterozygous carriers of these variants preferentially duplicate the same alleles (OR=1.91 (1.50–2.43) and 1.56 (1.28–1.90)), corroborating a pro-proliferative effect. (The *DLK1* locus also lies within an imprinted region that has previously been observed to be the target of parental bias in 14q CN-LOH mutations [31], raising the possibility of interaction between allelic and parental effects; however, familial data will be needed to investigate further.)

We also searched for associations between inherited variants and copy-number-altering mCAs (i.e., loss and gain events) in *cis* but did not find any associations aside from the *FRA10B* locus, at which we previously observed that fragile alleles confer risk of mosaic 10q deletions [9]. This association replicated here, with the common tag SNP rs11595735 (which tags rare fragile alleles) exhibiting  $P=5.2\times 10^{-169}$  association with 10q deletions. The fact that no other genotyped or imputed variants associated with losses or gains in *cis* indicates that no other fragile sites in Europeans influence mCA formation in the same way (or at least to the same extent) as *FRA10B*.

## 6 Inherited variants associated with mCAs in *trans*

A common haplotype in *TERT* broadly increases risk of clonal hematopoiesis involving any mosaic point mutation [7], and common variants also exert *trans* effects on the likelihood of mosaic *JAK2* V617F mutation [62] and sex chromosome loss [9, 27, 61, 63]. To identify more inherited haplotypes that similarly modify risk of autosomal mosaic chromosomal alterations in general, we conducted a genome-wide association analysis between common variants and presence of any detectable autosomal mCA (Methods). Three loci reached significance ( $P<5\times 10^{-8}$ ): *TERT* ( $P=6.9\times 10^{-18}$ , OR=1.11 (1.08–1.14) for rs7705526), *TERC* ( $P=2.9\times 10^{-8}$ , OR=0.93 (0.91–0.96) for rs12638862), and *SPI40* ( $P=9.4\times 10^{-9}$ , OR=1.08 (1.05–1.10) for rs62191195) (Supplementary Table 13).

The associations at *TERT* and *TERC* suggest that genetic differences in telomere maintenance make some individuals more susceptible to clonal expansions than others. Consistent with this hypothesis, we further observed that two additional telomere-length-associated SNPs [64] at *OBFC1* and *RTEL1* also associated with mCA susceptibility at nominal  $P<0.05$  significance (Supplementary Table 14). For 6 out of 7 SNPs previously associated with telomere length [64], the telomere

length-increasing allele exhibited a risk-increasing effect sign for mCAs (Supplementary Table 14).

The lead associated variant in *SPI40* matches the second-strongest association for chronic lymphocytic leukemia (CLL) [65], and we further observed that most CLL risk alleles increase risk of clonal hematopoiesis involving CLL-related +12 or 13q LOH events (Supplementary Note 8). These results demonstrate that common variants play a modest, quantitative role in altering processes that facilitate clonal expansion (in contrast to and in addition to the larger *cis* effects of variants on which mosaic CN-LOH mutations directly act by changing allele dosage).

## 7 Action of CN-LOH events on risk alleles for blood cancers

Genome-wide association studies have previously identified many inherited variants associated with increased risk of developing hematological malignancies such as chronic lymphocytic leukemia (CLL) and myeloproliferative neoplasms (MPN). We examined whether risk alleles identified by the largest GWAS conducted to date for CLL [65] and MPN [66] tended to be made homozygous by clonally expanded CN-LOH events. This hypothesis was very plausible for MPN GWAS hits given that three top MPN risk loci (*JAK2*, *ATM*, and *SH2B3*) also confer risk for mCA-associated CH.

We observed that CN-LOH clones in individuals heterozygous for MPN risk alleles did indeed tend to make these risk alleles homozygous (Supplementary Table 17). This effect was clearest at *JAK2*, *ATM*, and *SH2B3* ( $P < 6 \times 10^{-6}$  at each locus) but appeared to extend broadly to other MPN risk loci: among 24 risk alleles originally heterozygous in at least one CN-LOH clone, 19 were made homozygous more often than they were removed by CN-LOH mutations, whereas only 3 were made homozygous less often than they were removed ( $P = 0.0004$ , one-sided binomial sign test); the remaining 2 alleles were made homozygous and removed in equal numbers of clones. Four MPN risk alleles exhibited directional biases significant at  $FDR < 0.05$  on their own: the aforementioned *JAK2*, *ATM*, and *SH2B3* alleles and a *TET2* allele.

In contrast to the results for MPN, none of the 46 CLL risk alleles exhibited a significant association with CN-LOH directionality ( $P > 0.01$  for all alleles), and we also did not observe a significant sign test across risk alleles (26 alleles were made homozygous more often than they were removed, while 19 alleles were removed more often than they were made homozygous;  $P = 0.19$ , one-sided binomial sign test).

## 8 Shared genetic risk of CLL and mosaic +12 and 13q LOH

Chronic lymphocytic leukemia (CLL) is a highly heritable hematological malignancy, with 42 risk loci identified to date by GWAS on up to 6,200 cases [65,67–74]. Given the relatively large number of carriers of CLL-associated mosaic events in the UK Biobank data set ( $\sim 2,000$ ), we sought

to investigate the extent to which CLL risk alleles also influence risk of clonal hematopoiesis involving CLL-associated chromosomal alterations. We examined the two types of mCAs most strongly associated with CLL: mosaic trisomy 12 (“+12”) and mosaic 13q LOH spanning *DLEU2* (including both del(13q) and 13q CN-LOH to maximize power).

For each of 46 independent lead variants at the 42 previously identified CLL risk loci [65], we performed association tests with three case-control phenotypes: mosaic +12, mosaic 13q LOH, and (as a check) CLL in UK Biobank. We restricted each association test to individuals who reported European ancestry, and we pruned to unrelated subsets of samples as in our *cis* GWAS analyses (Methods). For mosaic +12, we tested 634 cases, defined as individuals with a whole-chromosome 12 mosaic event (including unclassified events as well as events confidently classified as gains), and 378,107 controls, defined as individuals with no chr12 mosaic event. For 13q LOH, we tested 914 cases, defined as individuals with loss or CN-LOH events spanning *DLEU2*, and 378,048 controls, defined as individuals with no chr13 mosaic event. For CLL, we tested 656 cases, defined as individuals with any reported CLL (prevalent or incident), and 378,606 controls. These case sets contained modest overlap: of the 634 mosaic +12 cases, 78 had prevalent or incident CLL, and of the 914 mosaic 13q LOH cases, 243 had prevalent or incident CLL. Thirty-five individuals had both mosaic +12 and mosaic 13q LOH; 14 of the 35 also had prevalent or incident CLL. We performed association tests on imputed genotypes using logistic regression in *plink* [38] adjusting for age and sex as covariates. We verified that previously reported CLL risk variants replicated well in UK Biobank, with a regression coefficient of 0.85 (0.75–0.96) for observed vs. expected log(OR) and consistent effect directions for 43 of 46 variants (Supplementary Table 21, plotted in Supplementary Fig. 37 of <https://doi.org/10.1101/653691>).

We observed that most CLL risk variants conferred risk for either mosaic +12, mosaic 13q LOH, or both (Supplementary Table 21). Of the 46 CLL risk alleles tested, 40 had risk-increasing effect directions on mosaic +12, with 21 reaching nominal significance ( $P < 0.05$ ). For mosaic 13q LOH, 42 of 46 CLL risk alleles had risk-increasing effects, with 29 reaching nominal significance (Supplementary Table 21). Broadly, the estimated effects of these 46 risk alleles on mosaic +12 and 13q LOH risk were moderately smaller than their reported effects on CLL (log(OR) regression coefficients of 0.52 (0.40–0.64) and 0.63 (0.53–0.73), respectively).

Interestingly, we observed heterogeneity in the effects of variants on mosaic +12 vs. mosaic 13q LOH risk: some variants appeared to influence one form of mosaicism much more than the other (Supplementary Table 21). We quantified this genetic heterogeneity by performing bivariate BOLT-REML analysis [75] and estimated a genetic correlation of 0.79 (0.09)—significantly less than 1—between mosaic +12 and mosaic 13q LOH risk. These results suggest that different genetic mechanisms may lead to different subtypes of CLL that manifest different chromosomal alterations.

## 9 Chromosome arms with multiple overlapping CN-LOH events

In our previous analysis of the UK Biobank interim data, we observed that in a small fraction of carriers of mosaic CN-LOH mutations, we could detect multiple clonal expansions of CN-LOH mutations with different breakpoints, often attributable to high-risk inherited alleles made homozygous or removed from the genome by those mutations [9]. Upon extending this analysis to the full cohort, we identified 110 examples of multiple overlapping CN-LOH mutations occurring on the same chromosome arm (among a total of 8,185 CN-LOH events). For 68 of these 110 cases, the events could be attributed to a high-risk inherited or acquired variant on the affected arm (Supplementary Table 23). Specifically, most cases of multiple overlapping CN-LOH clones appeared to be explained by action on rare inherited *TM2D3* variants (found in 13 of 17 events on 15q), rare inherited *MPL* variants (found in 10 of 20 events on 1p), inherited *JAK2* 46/1 risk haplotypes (found in 32 of 37 events on 9p) that had presumably caused somatic *JAK2* V617F mutation [50–53]), and somatic deletions of the *DLEU* region (found in 13 of 14 events on 13q).

The remaining events were scattered across 18 different chromosome arms, raising the possibility that inherited allelic configurations on other chromosomal arms might in rare instances impart a very high risk of CN-LOH (e.g., by “lining up” a set of proliferative alleles on one homologous chromosome). To further explore this question, we examined CN-LOH events called in 356 individuals for whom a monozygotic twin was also present in the data set (178 twin-pairs). Six CN-LOH events were ascertained among these 356 individuals; in two of these cases (one twin-pair), the twin also had acquired a clone with a CN-LOH event; and in this family, the twins’ acquired mutations affected the same chromosome arm (13q) in the same direction (i.e., the same parental haplotypes were gained and lost in both twins). These observations suggest that the alleles inherited on 13q in this pair of twins imparted very high risk of CN-LOH; however, we were unable to determine whether this high risk (if real) was contributed by a polygenic effect or by an ultra-rare, strong-effect variant we have not yet identified (e.g., in the *DLEU* locus commonly targeted by mCAs on 13q).

Taken together, these results suggest that while certain chromosome arms could in theory impart a very high risk of CN-LOH because they “line up” a set of proliferative alleles, this scenario probably happens quite rarely—which is reasonable given that alleles distributed across a chromosome arm assort approximately independently in the population, so the probability of lining up many proliferative alleles decreases exponentially with the number of loci.

## 10 Estimation of mortality risk conferred by mCAs

UK death registry data provided by UK Biobank reported 10,498 deaths on or before December 31, 2015 (the censoring date suggested by UK Biobank) from among 415,867 individuals of self-

reported European ancestry with no evidence of potential undiagnosed blood cancer based on anomalous blood counts (Methods). This censoring date corresponded to a median follow-up time of 6.9 years (range 5–10 years).

While the relatively small number of deaths in the cohort limited our power to identify links between mCAs and mortality, we observed that clones with gain of chromosome 8 (which contains the *MYC* oncogene) associated with increased mortality even in individuals with normal blood cell counts ( $P=3.5 \times 10^{-5}$ ), reaching Bonferroni significance among the 78 events tested, presumably due to large effect size (OR=5.10 (2.41–9.85)). In this analysis we applied statistical tests analogous to our cancer outcome analyses, using Cochran-Mantel-Haenszel (CMH) tests to adjust for sex and age while accounting for case-control imbalance.

## 11 Additional discussion of clonal proliferation in the hematopoietic system

Hematopoiesis in adult humans involves a hierarchy of progressive cell division and differentiation that enables a relatively small pool of  $\sim 10^4$  hematopoietic stem cells (HSCs) to ultimately replenish a much larger supply of mature, terminally-differentiated blood cells that turns over at the rate of  $\sim 10^{12}$  cells per day [76–78]. At the top of the hierarchy, HSCs have the unique ability to self-renew as well as differentiate; in contrast, hematopoietic progenitor cells in the middle tiers of the hierarchy can differentiate into increasingly large pools of increasingly differentiated cells downstream but cannot self-renew. The self-renewal property of HSCs enables maintenance of the HSC pool over the course of an individual’s lifetime and gives rise to clonal lineages of HSCs and their progeny in the blood system.

The hierarchical nature of the hematopoietic system enables very different dynamics of cell division during self-renewal of the HSC pool at the top vs. during differentiation toward mature blood cells at the bottom. In lieu of direct observation of HSC division dynamics in vivo, previous studies have inferred an average rate of  $\sim 1$ – $2$  HSC self-renewal divisions per year based on the rate of leukocyte telomere shortening with age [79, 80] and on X-chromosome inactivation patterns in females [81]. Recent work has further established heterogeneity among HSCs, with a rare population of dormant HSCs experiencing only four self-renewal divisions within an individual’s lifetime [82, 83]. In contrast, the differentiation process that replenishes  $\sim 10^{12}$  cells per day requires a few dozen cell divisions to reach this population size from a pool of  $\sim 10^4$  HSCs.

Recent studies have begun obtaining insights into the points in the hematopoietic hierarchy at which the somatic mutations observed in clonal hematopoiesis occur and enjoy proliferative advantage. Young et al. [84] used flow cytometry to sort peripheral blood cells from individuals with clonal hematopoiesis into myeloid and lymphoid compartments and observed the same clonal SNVs in both compartments, frequently with similar variant allele frequencies, and concluded that the mutations likely originated in HSCs. More recently, Arends et al. [85] performed flow-

sorting of both peripheral blood and bone marrow samples and traced clonal mutations to Lin<sup>-</sup>CD34<sup>+</sup>CD38<sup>-</sup> HSCs in bone marrow with subsequent expansion to myeloid progenitors; Jann et al. [86] obtained confirmatory results in similar analyses.

Interestingly, Arends et al.'s flow-sorting analyses revealed differing dynamics of clonal expansion in different individuals, with some exhibiting roughly constant expansion rates from HSC to progenitor to mature cells and others exhibiting greatest expansion during early differentiation. Additionally, mutant allelic fractions differed across different cell types.

The above studies have shed light on the manner in which clonal hematopoiesis mutations rise to detectable allelic fractions in peripheral blood, yet many details of this progression remain unclear. Clonality at different cell fractions in different lineages could be explained by either 1) a mutation conferring cell-type-specific survival or proliferative advantages or disadvantages; or 2) the mutation biasing differentiation toward one or more lineages and away from others. Future work will be necessary to determine, for each mutation, which of these mechanisms shape hematopoietic population dynamics and outcomes.

## References

1. Jacobs, K. B. *et al.* Detectable clonal mosaicism and its relationship to aging and cancer. *Nature Genetics* **44**, 651–658 (2012).
2. Laurie, C. C. *et al.* Detectable clonal mosaicism from birth to old age and its relationship to cancer. *Nature Genetics* **44**, 642–650 (2012).
3. Genovese, G. *et al.* Clonal hematopoiesis and blood-cancer risk inferred from blood DNA sequence. *New England Journal of Medicine* **371**, 2477–2487 (2014).
4. Jaiswal, S. *et al.* Age-related clonal hematopoiesis associated with adverse outcomes. *New England Journal of Medicine* **371**, 2488–2498 (2014).
5. Machiela, M. J. *et al.* Characterization of large structural genetic mosaicism in human autosomes. *American Journal of Human Genetics* **96**, 487–497 (2015).
6. Vattathil, S. & Scheet, P. Extensive hidden genomic mosaicism revealed in normal tissue. *American Journal of Human Genetics* **98**, 571–578 (2016).
7. Zink, F. *et al.* Clonal hematopoiesis, with and without candidate driver mutations, is common in the elderly. *Blood* **130**, 742–752 (2017).
8. Abelson, S. *et al.* Prediction of acute myeloid leukaemia risk in healthy individuals. *Nature* **559**, 400–404 (2018).
9. Loh, P.-R. *et al.* Insights into clonal haematopoiesis from 8,342 mosaic chromosomal alterations. *Nature* **559**, 350–355 (2018).
10. Bycroft, C. *et al.* The UK Biobank resource with deep phenotyping and genomic data. *Nature* **562**, 203–209 (2018).
11. Uziel, T. *et al.* Requirement of the MRN complex for ATM activation by DNA damage. *The EMBO Journal* **22**, 5612–5621 (2003).
12. Lee, J.-H. & Paull, T. T. ATM activation by DNA double-strand breaks through the Mre11-Rad50-Nbs1 complex. *Science* **308**, 551–554 (2005).
13. Deng, Y., Guo, X., Ferguson, D. O. & Chang, S. Multiple roles for MRE11 at uncapped telomeres. *Nature* **460**, 914 (2009).
14. Kimura, S., Roberts, A. W., Metcalf, D. & Alexander, W. S. Hematopoietic stem cell deficiencies in mice lacking c-Mpl, the receptor for thrombopoietin. *Proceedings of the National Academy of Sciences* **95**, 1195–1200 (1998).
15. Solar, G. P. *et al.* Role of c-mpl in early hematopoiesis. *Blood* **92**, 4–10 (1998).
16. Seita, J. *et al.* Lnk negatively regulates self-renewal of hematopoietic stem cells by modifying thrombopoietin-mediated signal transduction. *Proceedings of the National Academy of Sciences* **104**, 2349–2354 (2007).

17. Loh, P.-R., Palamara, P. F. & Price, A. L. Fast and accurate long-range phasing in a UK Biobank cohort. *Nature Genetics* **48**, 811–816 (2016).
18. Loh, P.-R. *et al.* Reference-based phasing using the Haplotype Reference Consortium panel. *Nature Genetics* **48**, 1443–1448 (2016).
19. Auer, P. L. *et al.* Rare and low-frequency coding variants in *CXCR2* and other genes are associated with hematological traits. *Nature Genetics* **46**, 629 (2014).
20. Schultz, K. A. P. *et al.* *PTEN*, *DICER1*, *FH*, and their associated tumor susceptibility syndromes: clinical features, genetics, and surveillance recommendations in childhood. *Clinical Cancer Research* **23**, e76–e82 (2017).
21. Landrum, M. J. *et al.* ClinVar: improving access to variant interpretations and supporting evidence. *Nucleic Acids Research* **46**, D1062–D1067 (2018).
22. Van Hout, C. V. *et al.* Whole exome sequencing and characterization of coding variation in 49,960 individuals in the UK Biobank. *bioRxiv* (2019).
23. Meuwissen, T., Hayes, B. & Goddard, M. Prediction of total genetic value using genome-wide dense marker maps. *Genetics* **157**, 1819–1829 (2001).
24. Purcell, S. M. *et al.* Common polygenic variation contributes to risk of schizophrenia and bipolar disorder. *Nature* **460**, 748–752 (2009).
25. Khera, A. V. *et al.* Genome-wide polygenic scores for common diseases identify individuals with risk equivalent to monogenic mutations. *Nature Genetics* **50**, 1219 (2018).
26. Loh, P.-R. *et al.* Efficient Bayesian mixed model analysis increases association power in large cohorts. *Nature Genetics* **47**, 284–290 (2015).
27. Thompson, D. J. *et al.* Genetic predisposition to mosaic Y chromosome loss in blood. *Nature* **575**, 652–657 (2019).
28. Jaiswal, S. *et al.* Clonal hematopoiesis and risk of atherosclerotic cardiovascular disease. *New England Journal of Medicine* **377**, 111–121 (2017).
29. Davoli, T. *et al.* Cumulative haploinsufficiency and triplosensitivity drive aneuploidy patterns and shape the cancer genome. *Cell* **155**, 948–962 (2013).
30. O’Keefe, C., McDevitt, M. A. & Maciejewski, J. P. Copy neutral loss of heterozygosity: a novel chromosomal lesion in myeloid malignancies. *Blood* **115**, 2731–2739 (2010).
31. Chase, A. *et al.* Profound parental bias associated with chromosome 14 acquired uniparental disomy indicates targeting of an imprinted locus. *Leukemia* **29**, 2069–2074 (2015).
32. Choate, K. A. *et al.* Mitotic recombination in patients with ichthyosis causes reversion of dominant mutations in *KRT10*. *Science* **330**, 94–97 (2010).



33. Tesi, B. *et al.* Gain-of-function *SAMD9L* mutations cause a syndrome of cytopenia, immunodeficiency, MDS and neurological symptoms. *Blood* **129**, 2266–2279 (2017).
34. Ripke, S. *et al.* Biological insights from 108 schizophrenia-associated genetic loci. *Nature* **511**, 421–427 (2014).
35. Sudlow, C. *et al.* UK Biobank: an open access resource for identifying the causes of a wide range of complex diseases of middle and old age. *PLOS Medicine* **12**, 1–10 (2015).
36. Wain, L. V. *et al.* Novel insights into the genetics of smoking behaviour, lung function, and chronic obstructive pulmonary disease (UK BiLEVE): a genetic association study in UK Biobank. *Lancet Respiratory Medicine* **3**, 769–781 (2015).
37. Das, S. *et al.* Next-generation genotype imputation service and methods. *Nature Genetics* **48**, 1284–1287 (2016).
38. Chang, C. C. *et al.* Second-generation PLINK: rising to the challenge of larger and richer datasets. *GigaScience* **4**, 1–16 (2015).
39. Peiffer, D. A. *et al.* High-resolution genomic profiling of chromosomal aberrations using Infinium whole-genome genotyping. *Genome Research* **16**, 1136–1148 (2006).
40. Diskin, S. J. *et al.* Adjustment of genomic waves in signal intensities from whole-genome SNP genotyping platforms. *Nucleic Acids Research* **36**, e126 (2008).
41. Manichaikul, A. *et al.* Robust relationship inference in genome-wide association studies. *Bioinformatics* **26**, 2867–2873 (2010).
42. Rentzsch, P., Witten, D., Cooper, G. M., Shendure, J. & Kircher, M. CADD: predicting the deleteriousness of variants throughout the human genome. *Nucleic Acids Research* **47**, D886–D894 (2019).
43. McLaren, W. *et al.* The Ensembl Variant Effect Predictor. *Genome Biology* **17**, 122 (2016).
44. Thorvaldsdóttir, H., Robinson, J. T. & Mesirov, J. P. Integrative genomics viewer (igv): high-performance genomics data visualization and exploration. *Briefings in Bioinformatics* **14**, 178–192 (2013).
45. Pedersen, B. S. & Quinlan, A. R. Mosdepth: quick coverage calculation for genomes and exomes. *Bioinformatics* **34**, 867–868 (2017).
46. Regier, A. A. *et al.* Functional equivalence of genome sequencing analysis pipelines enables harmonized variant calling across human genetics projects. *Nature Communications* **9**, 4038 (2018).
47. Loh, P.-R., Kichaev, G., Gazal, S., Schoech, A. P. & Price, A. L. Mixed-model association for biobank-scale datasets. *Nature Genetics* **50**, 906–908 (2018).

48. Turner, J. J. *et al.* InterLymph hierarchical classification of lymphoid neoplasms for epidemiologic research based on the WHO classification (2008): update and future directions. *Blood* **116**, e90–e98 (2010).
49. Arber, D. A. *et al.* The 2016 revision to the World Health Organization (WHO) classification of myeloid neoplasms and acute leukemia. *Blood* **127**, 2391–2405 (2016).
50. Jones, A. V. *et al.* *JAK2* haplotype is a major risk factor for the development of myeloproliferative neoplasms. *Nature Genetics* **41**, 446–449 (2009).
51. Kilpivaara, O. *et al.* A germline *JAK2* SNP is associated with predisposition to the development of *JAK2*V617F-positive myeloproliferative neoplasms. *Nature Genetics* **41**, 455–459 (2009).
52. Olcaydu, D. *et al.* A common *JAK2* haplotype confers susceptibility to myeloproliferative neoplasms. *Nature Genetics* **41**, 450–454 (2009).
53. Koren, A. *et al.* Genetic variation in human DNA replication timing. *Cell* **159**, 1015–1026 (2014).
54. Gusev, A. *et al.* Whole population, genome-wide mapping of hidden relatedness. *Genome Research* **19**, 318–326 (2009).
55. Kitsberg, D. *et al.* Allele-specific replication timing of imprinted gene regions. *Nature* **364**, 459 (1993).
56. O’Connell, J. *et al.* Haplotype estimation for biobank-scale data sets. *Nature Genetics* **48**, 817–820 (2016).
57. Williams, A. L., Patterson, N., Glessner, J., Hakonarson, H. & Reich, D. Phasing of many thousands of genotyped samples. *American Journal of Human Genetics* **91**, 238–251 (2012).
58. O’Connell, J. *et al.* A general approach for haplotype phasing across the full spectrum of relatedness. *PLOS Genetics* **10**, e1004234 (2014).
59. McCarthy, S. *et al.* A reference panel of 64,976 haplotypes for genotype imputation. *Nature Genetics* **48**, 1279–1283 (2016).
60. Huang, J. *et al.* Improved imputation of low-frequency and rare variants using the UK10K haplotype reference panel. *Nature Communications* **6** (2015).
61. Wright, D. J. *et al.* Genetic variants associated with mosaic Y chromosome loss highlight cell cycle genes and overlap with cancer susceptibility. *Nature Genetics* **49**, 674–679 (2017).
62. Hinds, D. A. *et al.* Germ line variants predispose to both *JAK2* V617F clonal hematopoiesis and myeloproliferative neoplasms. *Blood* **128**, 1121–1128 (2016).
63. Zhou, W. *et al.* Mosaic loss of chromosome Y is associated with common variation near *TCL1A*. *Nature Genetics* **48**, 563–568 (2016).

64. Codd, V. *et al.* Identification of seven loci affecting mean telomere length and their association with disease. *Nature Genetics* **45**, 422–427 (2013).
65. Law, P. J. *et al.* Genome-wide association analysis implicates dysregulation of immunity genes in chronic lymphocytic leukaemia. *Nature Communications* **8**, 14175 (2017).
66. Bao, E. L. *et al.* Genetic predisposition to myeloproliferative neoplasms implicates hematopoietic stem cell biology. *bioRxiv* 790626 (2019).
67. Di Bernardo, M. C. *et al.* A genome-wide association study identifies six susceptibility loci for chronic lymphocytic leukemia. *Nature Genetics* **40**, 1204–1210 (2008).
68. Crowther-Swanepoel, D. *et al.* Common variants at 2q37.3, 8q24.21, 15q21.3 and 16q24.1 influence chronic lymphocytic leukemia risk. *Nature Genetics* **42**, 132 (2010).
69. Slager, S. L. *et al.* Genome-wide association study identifies a novel susceptibility locus at 6p21.3 among familial CLL. *Blood* **117**, 1911–1916 (2011).
70. Slager, S. L. *et al.* Common variation at 6p21.31 (*BAK1*) influences the risk of chronic lymphocytic leukemia. *Blood* **120**, 843–846 (2012).
71. Berndt, S. I. *et al.* Genome-wide association study identifies multiple risk loci for chronic lymphocytic leukemia. *Nature Genetics* **45**, 868–876 (2013).
72. Speedy, H. E. *et al.* A genome-wide association study identifies multiple susceptibility loci for chronic lymphocytic leukemia. *Nature Genetics* **46**, 56–60 (2014).
73. Sava, G. *et al.* Common variation at 12q24.13 (*OAS3*) influences chronic lymphocytic leukemia risk. *Leukemia* **29**, 748 (2015).
74. Berndt, S. I. *et al.* Meta-analysis of genome-wide association studies discovers multiple loci for chronic lymphocytic leukemia. *Nature Communications* **7** (2016).
75. Loh, P.-R. *et al.* Contrasting genetic architectures of schizophrenia and other complex diseases using fast variance components analysis. *Nature Genetics* **47**, 1385–1392 (2015).
76. Orkin, S. H. & Zon, L. I. Hematopoiesis: an evolving paradigm for stem cell biology. *Cell* **132**, 631–644 (2008).
77. Doulatov, S., Notta, F., Laurenti, E. & Dick, J. E. Hematopoiesis: a human perspective. *Cell Stem Cell* **10**, 120–136 (2012).
78. Abkowitz, J. L., Catlin, S. N., McCallie, M. T. & Gutterop, P. Evidence that the number of hematopoietic stem cells per animal is conserved in mammals. *Blood* **100**, 2665–2667 (2002).
79. Shepherd, B. E., Gutterop, P., Lansdorp, P. M. & Abkowitz, J. L. Estimating human hematopoietic stem cell kinetics using granulocyte telomere lengths. *Experimental Hematology* **32**, 1040–1050 (2004).

80. Sidorov, I., Kimura, M., Yashin, A. & Aviv, A. Leukocyte telomere dynamics and human hematopoietic stem cell kinetics during somatic growth. *Experimental Hematology* **37**, 514–524 (2009).
81. Catlin, S. N., Busque, L., Gale, R. E., Gutterop, P. & Abkowitz, J. L. The replication rate of human hematopoietic stem cells in vivo. *Blood* **117**, 4460–4466 (2011).
82. Foudi, A. *et al.* Analysis of histone 2b-gfp retention reveals slowly cycling hematopoietic stem cells. *Nature Biotechnology* **27**, 84 (2009).
83. Bernitz, J. M., Kim, H. S., MacArthur, B., Sieburg, H. & Moore, K. Hematopoietic stem cells count and remember self-renewal divisions. *Cell* **167**, 1296–1309 (2016).
84. Young, A. L., Challen, G. A., Birmann, B. M. & Druley, T. E. Clonal haematopoiesis harbouring AML-associated mutations is ubiquitous in healthy adults. *Nature Communications* **7** (2016).
85. Arends, C. M. *et al.* Hematopoietic lineage distribution and evolutionary dynamics of clonal hematopoiesis. *Leukemia* **32**, 1908 (2018).
86. Jann, J.-C. *et al.* Comparative analysis of clonal hematopoiesis of multipotent stem cells in healthy elderly in blood and bone marrow. *Leukemia Research* **82**, 15 (2019).

**Supplementary Table 1. Number of mosaic chromosomal alterations detected per chromosome.**

| Chromosome    | $N_{\text{loss}}$ | $N_{\text{CN-LOH}}$ | $N_{\text{gain}}$ | $N_{\text{undetermined}}$ | $N_{\text{total}}$ |
|---------------|-------------------|---------------------|-------------------|---------------------------|--------------------|
| chr1          | 97                | 1179                | 68                | 522                       | 1866               |
| chr2          | 214               | 264                 | 26                | 159                       | 663                |
| chr3          | 74                | 225                 | 174               | 185                       | 658                |
| chr4          | 138               | 245                 | 24                | 116                       | 523                |
| chr5          | 172               | 131                 | 88                | 110                       | 501                |
| chr6          | 119               | 311                 | 33                | 194                       | 657                |
| chr7          | 176               | 176                 | 23                | 118                       | 493                |
| chr8          | 69                | 127                 | 156               | 141                       | 493                |
| chr9          | 52                | 706                 | 112               | 258                       | 1128               |
| chr10         | 290               | 129                 | 11                | 131                       | 561                |
| chr11         | 296               | 875                 | 4                 | 366                       | 1541               |
| chr12         | 81                | 251                 | 530               | 342                       | 1204               |
| chr13         | 596               | 444                 | 12                | 237                       | 1289               |
| chr14         | 161*              | 704                 | 162               | 377                       | 1404               |
| chr15         | 44                | 407                 | 223               | 332                       | 1006               |
| chr16         | 180               | 470                 | 8                 | 202                       | 860                |
| chr17         | 231               | 435                 | 135               | 290                       | 1091               |
| chr18         | 58                | 100                 | 200               | 153                       | 511                |
| chr19         | 17                | 339                 | 48                | 275                       | 679                |
| chr20         | 458               | 204                 | 8                 | 133                       | 803                |
| chr21         | 58                | 138                 | 153               | 228                       | 577                |
| chr22         | 137*              | 325                 | 191               | 471                       | 1124               |
| All autosomes | 3718              | 8185                | 2389              | 5340                      | 19632              |

\*Deletions on chr14 and chr22 include V(D)J recombination events (61 events on chr14 and 80 events on chr22).

**Supplementary Table 2. Distribution of the number of detected somatic autosomal mCAs per individual.**

| mCA count | Frequency |
|-----------|-----------|
| 0         | 465678    |
| 1         | 15520     |
| 2         | 1084      |
| 3         | 329       |
| 4         | 95        |
| 5         | 40        |
| 6         | 18        |
| 7         | 6         |
| 8         | 6         |
| 9         | 1         |
| 10        | 3         |
| 11        | 0         |
| 12        | 1         |
| 13        | 1         |
| 14        | 2         |
| 15        | 1         |
| 16        | 1         |
| 17        | 2         |
| 18        | 0         |
| 19        | 0         |
| 20        | 0         |
| 21        | 0         |
| 22        | 1         |

Most individuals with several detected mCAs have prevalent or incident blood cancers.

**Supplementary Table 3. Fraction of individuals with detected mCAs as a function of age.**

| Age range | % of males with autosomal event (s.e.) | % of females with autosomal event (s.e.) |
|-----------|----------------------------------------|------------------------------------------|
| <45       | 1.8% (0.1%)                            | 1.8% (0.1%)                              |
| 45-50     | 2.1% (0.1%)                            | 2.0% (0.1%)                              |
| 50-55     | 2.6% (0.1%)                            | 2.4% (0.1%)                              |
| 55-60     | 3.5% (0.1%)                            | 3.1% (0.1%)                              |
| 60-65     | 4.7% (0.1%)                            | 4.0% (0.1%)                              |
| >65       | 6.0% (0.1%)                            | 4.9% (0.1%)                              |

This table provides numerical data plotted in Extended Data Fig. 2f. Consistent with previous work [1, 2, 5, 6, 9], mosaic chromosomal alterations are detected more frequently with increasing age and in males.

**Supplementary Table 4. Age and sex distributions of individuals with detected mCAs on each chromosome.**

| chr | Loss events |             |            |             | CN-LOH events |             |            |             | Gain events |             |
|-----|-------------|-------------|------------|-------------|---------------|-------------|------------|-------------|-------------|-------------|
|     | p-arm       |             | q-arm      |             | p-arm         |             | q-arm      |             | Mean age    | Frac. male  |
|     | Mean age    | Frac. male  | Mean age   | Frac. male  | Mean age      | Frac. male  | Mean age   | Frac. male  |             |             |
| 1   | 60.6 (1.1)  | 0.40 (0.08) | 61.2 (0.9) | 0.62 (0.08) | 59.4 (0.3)    | 0.46 (0.02) | 58.8 (0.4) | 0.48 (0.02) | 60.4 (0.8)  | 0.45 (0.06) |
| 2   | 60.9 (0.6)  | 0.39 (0.04) | 61.3 (0.9) | 0.50 (0.07) | 59.9 (0.7)    | 0.44 (0.05) | 57.7 (0.6) | 0.44 (0.04) | 58.6 (1.4)  | 0.54 (0.10) |
| 3   | 60.9 (1.2)  | 0.57 (0.08) | 61.5 (1.6) | 0.36 (0.10) | 59.3 (0.7)    | 0.54 (0.05) | 60.2 (0.7) | 0.53 (0.05) | 61.9 (0.5)  | 0.56 (0.04) |
| 4   | 63.5 (1.1)  | 0.25 (0.13) | 61.5 (0.7) | 0.50 (0.05) | 55.5 (1.3)    | 0.49 (0.08) | 62.9 (0.5) | 0.46 (0.04) | 61.2 (1.9)  | 0.52 (0.11) |
| 5   | 62.0 (2.7)  | 0.40 (0.16) | 59.6 (0.6) | 0.35 (0.04) | 57.9 (1.7)    | 0.57 (0.14) | 58.4 (0.8) | 0.50 (0.05) | 60.0 (0.7)  | 0.59 (0.05) |
| 6   | 61.8 (1.3)  | 0.39 (0.09) | 61.8 (0.7) | 0.55 (0.06) | 58.7 (0.5)    | 0.47 (0.03) | 59.8 (1.0) | 0.49 (0.06) | 59.3 (1.5)  | 0.55 (0.09) |
| 7   | 59.5 (1.2)  | 0.30 (0.08) | 61.7 (0.5) | 0.52 (0.04) | 59.8 (0.9)    | 0.43 (0.06) | 59.5 (0.8) | 0.50 (0.05) | 59.0 (1.8)  | 0.43 (0.11) |
| 8   | 62.0 (0.8)  | 0.51 (0.07) | 62.0 (1.3) | 0.56 (0.13) | 56.3 (1.4)    | 0.41 (0.09) | 59.4 (0.8) | 0.50 (0.05) | 60.4 (0.6)  | 0.40 (0.04) |
| 9   | 66.6 (1.1)  | 0.43 (0.20) | 61.1 (1.4) | 0.47 (0.08) | 60.6 (0.4)    | 0.55 (0.03) | 59.9 (0.4) | 0.44 (0.03) | 61.1 (0.6)  | 0.54 (0.05) |
| 10  | 63.7 (2.1)  | 0.50 (0.22) | 57.4 (0.5) | 0.24 (0.03) | 58.5 (1.3)    | 0.51 (0.08) | 58.2 (0.9) | 0.37 (0.05) | 58.8 (2.8)  | 0.36 (0.15) |
| 11  | 59.0 (1.3)  | 0.57 (0.08) | 61.0 (0.4) | 0.64 (0.03) | 58.8 (0.3)    | 0.50 (0.02) | 60.5 (0.4) | 0.55 (0.03) | –           | –           |
| 12  | 62.3 (1.1)  | 0.57 (0.09) | 60.7 (1.1) | 0.52 (0.08) | 57.8 (1.2)    | 0.34 (0.07) | 58.9 (0.5) | 0.48 (0.04) | 62.3 (0.3)  | 0.55 (0.02) |
| 13  | –           | –           | 62.0 (0.3) | 0.60 (0.02) | –             | –           | 60.3 (0.4) | 0.54 (0.02) | 56.7 (2.9)  | 0.75 (0.13) |
| 14  | –           | –           | 61.3 (0.5) | 0.62 (0.04) | –             | –           | 60.0 (0.3) | 0.47 (0.02) | 63.6 (0.4)  | 0.59 (0.04) |
| 15  | –           | –           | 62.2 (1.1) | 0.46 (0.08) | –             | –           | 59.6 (0.4) | 0.48 (0.03) | 65.1 (0.3)  | 0.79 (0.03) |
| 16  | 59.1 (0.6)  | 0.30 (0.04) | 61.7 (1.1) | 0.61 (0.08) | 59.2 (0.5)    | 0.47 (0.03) | 59.4 (0.5) | 0.48 (0.03) | 55.0 (3.8)  | 0.50 (0.19) |
| 17  | 61.7 (0.5)  | 0.51 (0.04) | 60.9 (0.9) | 0.40 (0.07) | 59.6 (0.8)    | 0.54 (0.05) | 58.6 (0.4) | 0.46 (0.03) | 61.3 (0.6)  | 0.49 (0.04) |
| 18  | 60.6 (1.1)  | 0.67 (0.09) | 61.5 (1.6) | 0.32 (0.10) | 60.3 (1.8)    | 0.71 (0.13) | 59.7 (0.9) | 0.34 (0.05) | 61.7 (0.5)  | 0.60 (0.03) |
| 19  | 56.8 (2.3)  | 0.70 (0.15) | 61.7 (2.5) | 0.71 (0.18) | 58.8 (0.7)    | 0.42 (0.04) | 59.9 (0.5) | 0.47 (0.04) | 59.2 (1.1)  | 0.69 (0.07) |
| 20  | 62.8 (1.4)  | 0.50 (0.15) | 61.7 (0.3) | 0.66 (0.02) | 57.4 (1.3)    | 0.44 (0.08) | 58.8 (0.6) | 0.49 (0.04) | 57.4 (1.3)  | 0.25 (0.16) |
| 21  | –           | –           | 60.7 (0.9) | 0.34 (0.06) | –             | –           | 58.1 (0.7) | 0.49 (0.04) | 61.4 (0.5)  | 0.68 (0.04) |
| 22  | –           | –           | 62.9 (0.5) | 0.50 (0.04) | –             | –           | 60.6 (0.4) | 0.46 (0.03) | 60.8 (0.5)  | 0.48 (0.04) |

This table provides numerical data plotted in Extended Data Fig. 1b. (Events detected in fewer than 50 individuals were excluded from Extended Data Fig. 1b for clarity, and events detected in fewer than 5 individuals are excluded here. Chromosomes 13, 14, 15, 21, and 22 are acrocentric and have little or no p-arm genotyping.)



**Supplementary Table 5. Enrichment of mCAs in individuals with anomalous (top 1%) blood indices.**

| mCA | Blood index          | P-value | q-value | OR (95% CI)      | mCA  | Blood index          | P-value  | q-value  | OR (95% CI)        |
|-----|----------------------|---------|---------|------------------|------|----------------------|----------|----------|--------------------|
| 1p- | Lymphocyte #         | 1.5e-7  | 3.4e-6  | 31.3 (12.5–78.4) | 9+   | Platelet crit        | 2.2e-9   | 6.3e-8   | 13.6 (7.3–25.6)    |
| 1p- | Lymphocyte %         | 4.1e-9  | 1.1e-7  | 38.6 (16.1–92.4) | 9+   | Platelet dist. width | 2.2e-9   | 6.3e-8   | 13.6 (7.3–25.6)    |
| 1p- | RBC dist. width      | 0.0019  | 0.022   | 13.5 (4.0–45.2)  | 11q- | Lymphocyte #         | 7.3e-17  | 4.3e-15  | 12.9 (8.3–20.2)    |
| 1q- | Lymphocyte #         | 0.00015 | 0.0021  | 17.2 (6.0–49.9)  | 11q- | Lymphocyte %         | 1.3e-9   | 4.2e-8   | 8.5 (5.0–14.4)     |
| 1q- | Lymphocyte %         | 0.00015 | 0.0021  | 17.2 (6.0–49.9)  | 11p= | Monocyte %           | 0.0017   | 0.021    | 2.8 (1.6–5.0)      |
| 1p= | Platelet #           | 8.9e-5  | 0.0014  | 3.0 (1.9–4.9)    | 11q= | Lymphocyte %         | 0.0024   | 0.026    | 3.0 (1.6–5.7)      |
| 1p= | Platelet crit        | 8.9e-5  | 0.0014  | 3.0 (1.9–4.9)    | 11q= | Basophil #           | 0.0024   | 0.026    | 3.0 (1.6–5.7)      |
| 1+  | Monocyte #           | 0.002   | 0.022   | 8.1 (2.9–22.4)   | 12q- | Lymphocyte %         | 0.0044   | 0.043    | 9.9 (3.0–32.5)     |
| 1+  | Monocyte %           | 0.002   | 0.022   | 8.1 (2.9–22.4)   | 12q= | Lymphocyte #         | 0.0019   | 0.022    | 4.2 (2.0–9.0)      |
| 1+  | RBC dist. width      | 0.002   | 0.022   | 8.1 (2.9–22.4)   | 12+  | Lymphocyte #         | 1.6e-77  | 3.4e-75  | 25.0 (19.6–32.0)   |
| 1+  | Platelet dist. width | 0.002   | 0.022   | 8.1 (2.9–22.4)   | 12+  | Lymphocyte %         | 1.3e-58  | 1.6e-56  | 19.8 (15.2–25.8)   |
| 2q- | Lymphocyte #         | 2e-7    | 4.4e-6  | 19.8 (8.8–44.7)  | 12+  | Basophil #           | 5e-8     | 1.2e-6   | 4.9 (3.1–7.7)      |
| 2q- | Lymphocyte %         | 3.8e-6  | 7.8e-5  | 16.5 (7.0–39.2)  | 12+  | Monocyte #           | 5e-6     | 9.6e-5   | 4.1 (2.5–6.7)      |
| 2+  | Lymphocyte #         | 0.00051 | 0.0066  | 22.9 (6.5–80.3)  | 13q- | Lymphocyte #         | 1.9e-293 | 2.1e-290 | 106.9 (87.8–130.3) |
| 3p- | Neutrophil %         | 0.003   | 0.031   | 11.4 (3.5–37.8)  | 13q- | Lymphocyte %         | 3.6e-242 | 1.9e-239 | 82.1 (67.3–100.1)  |
| 3p- | Platelet #           | 9.7e-6  | 0.00017 | 20.6 (7.9–54.1)  | 13q- | Basophil #           | 3.8e-16  | 2e-14    | 7.7 (5.3–11.2)     |
| 3p- | Platelet crit        | 0.00019 | 0.0028  | 15.9 (5.5–45.6)  | 13q- | Monocyte #           | 1.6e-13  | 7e-12    | 6.8 (4.6–10.2)     |
| 3+  | Lymphocyte #         | 1.9e-12 | 7.4e-11 | 16.2 (9.2–28.5)  | 13q- | Platelet dist. width | 0.0029   | 0.031    | 2.8 (1.5–5.1)      |
| 3+  | Lymphocyte %         | 6.2e-9  | 1.7e-7  | 12.3 (6.6–23.0)  | 13q= | Lymphocyte #         | 8.2e-73  | 1.5e-70  | 25.9 (20.0–33.4)   |
| 4q- | Monocyte #           | 6.2e-5  | 0.00098 | 7.6 (3.5–16.5)   | 13q= | Lymphocyte %         | 3.2e-67  | 5e-65    | 24.1 (18.6–31.3)   |
| 4q- | Monocyte %           | 7e-6    | 0.00013 | 8.8 (4.3–18.2)   | 13q= | Monocyte #           | 0.0004   | 0.0055   | 3.4 (1.9–6.0)      |
| 4q= | Monocyte #           | 0.00025 | 0.0036  | 5.2 (2.5–10.5)   | 13q= | RBC dist. width      | 0.0046   | 0.044    | 2.8 (1.5–5.2)      |
| 4q= | Monocyte %           | 1.1e-12 | 4.2e-11 | 11.6 (7.0–19.3)  | 14q- | Lymphocyte #         | 1.8e-53  | 1.8e-51  | 63.0 (42.6–93.3)   |
| 5q- | Lymphocyte #         | 0.0018  | 0.021   | 5.0 (2.2–11.3)   | 14q- | Lymphocyte %         | 1.8e-53  | 1.8e-51  | 63.0 (42.6–93.3)   |
| 5q- | Monocyte %           | 4.4e-5  | 0.0007  | 6.7 (3.3–13.8)   | 14q- | Basophil #           | 0.0044   | 0.043    | 4.9 (2.0–12.0)     |
| 5q- | RBC dist. width      | 0.0018  | 0.021   | 5.0 (2.2–11.3)   | 14q= | Monocyte %           | 0.00049  | 0.0066   | 2.7 (1.6–4.4)      |
| 5+  | Lymphocyte #         | 4.6e-6  | 9e-5    | 11.8 (5.4–25.8)  | 15q- | Lymphocyte #         | 3.6e-6   | 7.5e-5   | 26.1 (9.7–69.9)    |
| 5+  | RBC dist. width      | 0.0044  | 0.043   | 6.4 (2.3–17.6)   | 15q- | Lymphocyte %         | 9e-5     | 0.0014   | 19.8 (6.8–58.0)    |
| 6q- | Lymphocyte #         | 4.4e-6  | 8.8e-5  | 16.1 (6.8–38.1)  | 15q- | Basophil #           | 0.0017   | 0.021    | 14.2 (4.2–47.5)    |
| 6q- | Lymphocyte %         | 0.0009  | 0.012   | 10.2 (3.6–28.5)  | 16q- | Lymphocyte #         | 7.2e-7   | 1.5e-5   | 22.9 (9.4–55.6)    |
| 7q- | Lymphocyte #         | 7.6e-11 | 2.7e-9  | 16.1 (8.7–29.6)  | 16q- | Lymphocyte %         | 1.6e-5   | 0.00028  | 18.4 (7.1–47.7)    |
| 7q- | Lymphocyte %         | 1.2e-9  | 3.9e-8  | 14.6 (7.7–27.4)  | 16q- | Monocyte #           | 0.004    | 0.04     | 10.2 (3.1–33.7)    |
| 8p- | Lymphocyte #         | 0.00051 | 0.0066  | 12.0 (4.3–33.9)  | 17p- | Lymphocyte #         | 4.8e-18  | 3.2e-16  | 18.2 (11.3–29.4)   |
| 8p- | Lymphocyte %         | 3.3e-5  | 0.00055 | 15.5 (6.0–39.8)  | 17p- | Lymphocyte %         | 8.8e-9   | 2.3e-7   | 10.2 (5.6–18.5)    |
| 9p= | Basophil #           | 0.001   | 0.013   | 3.4 (1.8–6.4)    | 18p- | Lymphocyte %         | 0.001    | 0.013    | 17.5 (5.1–59.7)    |
| 9p= | Monocyte #           | 0.0036  | 0.037   | 3.1 (1.6–6.0)    | 18+  | Lymphocyte #         | 2.2e-17  | 1.4e-15  | 16.7 (10.4–26.9)   |
| 9p= | Neutrophil #         | 6.7e-12 | 2.5e-10 | 7.5 (4.8–11.7)   | 18+  | Lymphocyte %         | 2e-8     | 5.1e-7   | 9.4 (5.2–17.0)     |
| 9p= | Neutrophil %         | 3.6e-10 | 1.2e-8  | 6.7 (4.2–10.7)   | 19+  | Lymphocyte #         | 3.6e-13  | 1.6e-11  | 47.3 (22.2–100.4)  |
| 9p= | Red #                | 6.9e-24 | 5.3e-22 | 12.3 (8.6–17.7)  | 19+  | Lymphocyte %         | 2.1e-8   | 5.2e-7   | 28.9 (12.5–67.2)   |
| 9p= | Hematocrit           | 1.3e-15 | 6.7e-14 | 9.0 (6.0–13.6)   | 19+  | Platelet dist. width | 0.0036   | 0.037    | 10.6 (3.2–34.9)    |
| 9p= | RBC dist. width      | 1.5e-29 | 1.2e-27 | 14.5 (10.3–20.4) | 20q- | Neutrophil %         | 3.3e-7   | 7.2e-6   | 4.8 (2.9–7.7)      |
| 9p= | Platelet #           | 3.2e-97 | 1.1e-94 | 40.6 (31.5–52.2) | 20q- | RBC dist. width      | 7.3e-6   | 0.00013  | 4.2 (2.5–7.0)      |
| 9p= | Platelet crit        | 5.1e-94 | 1.4e-91 | 39.2 (30.4–50.6) | 20q- | Platelet #           | 0.0015   | 0.019    | 3.0 (1.7–5.5)      |
| 9p= | Platelet dist. width | 1e-13   | 4.8e-12 | 8.3 (5.4–12.6)   | 20q- | Platelet crit        | 0.00045  | 0.0061   | 3.3 (1.9–5.9)      |
| 9q= | Lymphocyte #         | 0.0029  | 0.031   | 3.2 (1.6–6.1)    | 20q- | Platelet dist. width | 3.3e-7   | 7.2e-6   | 4.8 (2.9–7.7)      |
| 9+  | Lymphocyte #         | 3.9e-5  | 0.00063 | 8.3 (3.8–17.9)   | 20q= | Lymphocyte %         | 0.0032   | 0.033    | 4.4 (1.9–9.9)      |
| 9+  | Basophil #           | 0.0023  | 0.025   | 5.8 (2.3–14.2)   | 21q- | Lymphocyte %         | 0.0036   | 0.037    | 10.6 (3.2–34.9)    |
| 9+  | Monocyte #           | 2.2e-9  | 6.3e-8  | 13.6 (7.3–25.6)  | 21q- | Platelet dist. width | 0.00025  | 0.0036   | 14.7 (5.1–42.0)    |
| 9+  | Neutrophil #         | 3e-8    | 7.3e-7  | 12.2 (6.3–23.6)  | 22q- | Lymphocyte #         | 1.4e-63  | 1.9e-61  | 90.0 (60.1–134.8)  |
| 9+  | Neutrophil %         | 2.2e-9  | 6.3e-8  | 13.6 (7.3–25.6)  | 22q- | Lymphocyte %         | 1.6e-48  | 1.4e-46  | 63.7 (42.1–96.3)   |
| 9+  | RBC dist. width      | 5.1e-13 | 2.1e-11 | 18.1 (10.2–31.9) | 22+  | Lymphocyte #         | 6.1e-6   | 0.00011  | 6.6 (3.5–12.5)     |
| 9+  | Platelet #           | 1.5e-10 | 5.2e-9  | 15.1 (8.2–27.7)  | 22+  | Lymphocyte %         | 1.2e-8   | 3e-7     | 8.7 (4.9–15.4)     |

This table provides numerical data plotted in Extended Data Fig. 1c. Mosaic chromosomal alterations significantly enriched (at an FDR threshold of 0.05; one-sided Fisher’s exact test) in individuals with anomalous blood indices (top 1% among  $N=455,009$  self-reported white individuals) are reported. Events were grouped by chromosome and copy number, with loss and CN-LOH events subdivided by p-arm vs. q-arm. (We did not subdivide gain events by arm because most gain events are whole-chromosome trisomies; e.g., “3+” combines all gains—partial or complete—on chromosome 3.)

**Supplementary Table 6. Numbers of cases and controls for association tests with CN-LOH mutations in *cis*.**

| Arm | Locus        | $N_{\text{case}}$ | $N_{\text{control}}$ |
|-----|--------------|-------------------|----------------------|
| 1p  | <i>MPL</i>   | 633               | 377674               |
| 1q  | <i>FH</i>    | 666               | 377674               |
| 8q  | <i>NBN</i>   | 76                | 379049               |
| 9p  | <i>JAK2</i>  | 394               | 378410               |
| 11q | <i>MRE11</i> | 520               | 378073               |
| 11q | <i>ATM</i>   | 581               | 378073               |
| 12q | <i>SH2B3</i> | 250               | 378874               |
| 14q | <i>TCL1A</i> | 1021              | 378180               |
| 14q | <i>DLK1</i>  | 1052              | 378180               |
| 15q | <i>TM2D3</i> | 605               | 378617               |

Sample sets were determined by first filtering on ancestry and relatedness, and then at each locus, defining cases to be individuals with a mosaic event spanning the locus (or within 4Mb of the locus) likely to be a CN-LOH event (Methods). Individuals with likely CN-LOH events on the same chromosome but not within 4Mb of the locus were excluded from association analyses.

**Supplementary Table 7. Rare coding or splice variants associated at FDR<0.05 significance with mosaic CN-LOH mutations in *cis*.**

| Chr                                                           | Position <sup>a</sup> | Variant                | Effect <sup>b</sup> | Alleles <sup>c</sup> | AF <sup>d</sup>    | Source    | INFO/R2 | GWAS                   |                | Allelic shift in hets                |                         |                       |
|---------------------------------------------------------------|-----------------------|------------------------|---------------------|----------------------|--------------------|-----------|---------|------------------------|----------------|--------------------------------------|-------------------------|-----------------------|
|                                                               |                       |                        |                     |                      |                    |           |         | <i>P</i>               | OR (95% CI)    | <i>N</i> <sub>REF</sub> <sup>e</sup> | <i>N</i> <sub>ALT</sub> | <i>P</i>              |
| <b>MPL: 28/61 tested variants significant at FDR&lt;0.05</b>  |                       |                        |                     |                      |                    |           |         |                        |                |                                      |                         |                       |
| 1                                                             | 43803600              | rs146249964            | splice donor        | T/A                  | 0.0001             | HRC imp   | 0.685   | 2.8×10 <sup>-23</sup>  | 97 (55–171)    | 12                                   | 0                       | 0.00049               |
| 1                                                             | 43803817              | rs148434485            | stop gained         | C/T                  | 2×10 <sup>-5</sup> | BB array  | –       | 1.6×10 <sup>-6</sup>   | 128 (37–446)   | 2                                    | 0                       | 0.5                   |
| 1                                                             | 43803824              | rs145714475            | missense            | T/C                  | 2×10 <sup>-5</sup> | HRC imp   | 0.394   | 1.9×10 <sup>-6</sup>   | 120 (35–414)   | 3                                    | 0                       | 0.25                  |
| 1                                                             | 43803835              | rs764333753            | missense            | A/G                  | 3×10 <sup>-5</sup> | WES imp   | 0.782   | 1.7×10 <sup>-2</sup>   | 31 (4–235)     | 1                                    | 0                       | 1                     |
| 1                                                             | 43803877              | rs766172846            | missense            | T/C                  | 4×10 <sup>-5</sup> | WES imp   | 0.849   | 7.7×10 <sup>-4</sup>   | 37 (9–156)     | 2                                    | 0                       | 0.5                   |
| 1                                                             | 43803903              | rs142565191            | splice donor        | G/A                  | 4×10 <sup>-5</sup> | WES imp   | 0.914   | 7.5×10 <sup>-6</sup>   | 72 (22–238)    | 3                                    | 0                       | 0.25                  |
| 1                                                             | 43804234              | rs587778514            | frameshift          | CCT/C                | 1×10 <sup>-5</sup> | BB array  | –       | 3.9×10 <sup>-5</sup>   | 199 (40–987)   | 2                                    | 0                       | 0.5                   |
| 1                                                             | 43804305              | rs28928907             | missense            | G/C                  | 0.0006             | BB array  | –       | 1.9×10 <sup>-130</sup> | 142 (111–184)  | 70                                   | 0                       | 1.7×10 <sup>-21</sup> |
| 1                                                             | 43804375              | rs587778515            | frameshift          | CT/C                 | 0.0002             | BB array  | –       | 7.0×10 <sup>-41</sup>  | 105 (68–161)   | 24                                   | 0                       | 1.2×10 <sup>-7</sup>  |
| 1                                                             | 43804396              | rs752453717            | splice modifier     | G/C                  | 0.0003             | BB array  | –       | 5.8×10 <sup>-36</sup>  | 74 (48–113)    | 24                                   | 0                       | 1.2×10 <sup>-7</sup>  |
| 1                                                             | 43804957              | rs764904424            | missense            | C/G                  | 0.0001             | WES imp   | 0.750   | 2.1×10 <sup>-8</sup>   | 35 (15–79)     | 6                                    | 0                       | 0.031                 |
| 1                                                             | 43805052              | rs6088                 | missense            | G/A                  | 9×10 <sup>-5</sup> | WES imp   | 0.825   | 8.3×10 <sup>-10</sup>  | 61 (26–141)    | 6                                    | 0                       | 0.031                 |
| 1                                                             | 43805059              | rs769867913            | missense            | G/A                  | 2×10 <sup>-5</sup> | WES imp   | 0.439   | 1.4×10 <sup>-2</sup>   | 37 (5–282)     | 1                                    | 0                       | 1                     |
| 1                                                             | 43805656              | rs144210383            | missense            | G/T                  | 0.0001             | WES imp   | 0.676   | 5.3×10 <sup>-9</sup>   | 44 (19–101)    | 6                                    | 0                       | 0.031                 |
| 1                                                             | 43805686              | rs587778518            | frameshift          | C/CCTGG              | 3×10 <sup>-5</sup> | WES imp   | 0.825   | 1.6×10 <sup>-2</sup>   | 33 (4–249)     | 1                                    | 0                       | 1                     |
| 1                                                             | 43805713              | rs121913611            | missense            | C/T                  | 0.0002             | BB array  | –       | 3.3×10 <sup>-28</sup>  | 102 (61–171)   | 17                                   | 0                       | 1.5×10 <sup>-5</sup>  |
| 1                                                             | 43806073              | 1:43806073             | missense            | A/C                  | 2×10 <sup>-5</sup> | WES imp   | 0.853   | 1.5×10 <sup>-4</sup>   | 92 (21–408)    | 2                                    | 0                       | 0.5                   |
| 1                                                             | 43812115              | rs769297582            | splice acceptor     | G/C                  | 2×10 <sup>-5</sup> | WES imp   | 0.760   | 5.1×10 <sup>-7</sup>   | 199 (54–737)   | 3                                    | 0                       | 0.25                  |
| 1                                                             | 43812574              | rs200454070            | missense            | G/A                  | 3×10 <sup>-5</sup> | WES imp   | 0.568   | 2.0×10 <sup>-2</sup>   | 26 (4–192)     | 1                                    | 0                       | 1                     |
| 1                                                             | 43814551              | rs765671565            | missense            | T/A                  | 9×10 <sup>-6</sup> | WES imp   | 0.771   | 5.9×10 <sup>-3</sup>   | 100 (12–827)   | 1                                    | 0                       | 1                     |
| 1                                                             | 43814590              | rs1175548872           | missense            | G/C                  | 1×10 <sup>-5</sup> | WES imp   | 0.898   | 7.5×10 <sup>-3</sup>   | 75 (9–597)     | 1                                    | 0                       | 1                     |
| 1                                                             | 43814627              | rs754859909            | stop gained         | G/A                  | 7×10 <sup>-5</sup> | WES imp   | 0.939   | 1.7×10 <sup>-16</sup>  | 126 (61–258)   | 9                                    | 0                       | 0.0039                |
| 1                                                             | 43814673              | rs923814653            | missense            | G/T                  | 3×10 <sup>-5</sup> | WES imp   | 0.966   | 4.1×10 <sup>-4</sup>   | 52 (12–221)    | 3                                    | 0                       | 0.25                  |
| 1                                                             | 43814729              | 454bp del <sup>f</sup> | exon 10 deletion    | ref/del              | 0.0002             | array LRR | –       | 3.6×10 <sup>-58</sup>  | 153 (104–225)  | 31                                   | 0                       | 9.3×10 <sup>-10</sup> |
| 1                                                             | 43815009              | rs121913615            | missense            | G/T                  | 2×10 <sup>-5</sup> | WES imp   | 0.936   | 1.4×10 <sup>-2</sup>   | 37 (5–282)     | 1                                    | 0                       | 1                     |
| 1                                                             | 43817942              | rs369156948            | stop gained         | C/T                  | 3×10 <sup>-5</sup> | HRC imp   | 0.225   | 4.8×10 <sup>-8</sup>   | 114 (39–333)   | 4                                    | 0                       | 0.12                  |
| 1                                                             | 43817973              | rs971379181            | frameshift          | CG/C                 | 3×10 <sup>-5</sup> | BB array  | –       | 5.8×10 <sup>-13</sup>  | 240 (93–618)   | 6                                    | 0                       | 0.031                 |
| 1                                                             | 43818435              | rs1366403560           | stop gained         | C/T                  | 2×10 <sup>-5</sup> | WES imp   | 0.866   | 1.3×10 <sup>-4</sup>   | 100 (22–446)   | 2                                    | 0                       | 0.5                   |
| <b>FH: 1/41 tested variants significant at FDR&lt;0.05</b>    |                       |                        |                     |                      |                    |           |         |                        |                |                                      |                         |                       |
| 1                                                             | 241675301             | rs199822819            | missense            | G/C                  | 0.0003             | WES imp   | 0.869   | 4.9×10 <sup>-11</sup>  | 28 (14–55)     | 1                                    | 8                       | 0.039                 |
| <b>NBN: 2/48 tested variants significant at FDR&lt;0.05</b>   |                       |                        |                     |                      |                    |           |         |                        |                |                                      |                         |                       |
| 8                                                             | 90983420              | rs777460725            | missense            | A/C                  | 0.0001             | WES imp   | 0.794   | 8.1×10 <sup>-5</sup>   | 114 (28–465)   | 0                                    | 2                       | 0.5                   |
| 8                                                             | 90983441              | rs1187082186           | frameshift          | ATTTGT/A             | 0.0002             | WES imp   | 0.844   | 4.8×10 <sup>-13</sup>  | 210 (92–484)   | 0                                    | 6                       | 0.031                 |
| <b>MRE11: 1/42 tested variants significant at FDR&lt;0.05</b> |                       |                        |                     |                      |                    |           |         |                        |                |                                      |                         |                       |
| 11                                                            | 94189489              | rs587781384            | stop gained         | C/A                  | 4×10 <sup>-5</sup> | WES imp   | 0.945   | 5.6×10 <sup>-10</sup>  | 130 (50–338)   | 0                                    | 5                       | 0.062                 |
| <b>ATM: 13/352 tested variants significant at FDR&lt;0.05</b> |                       |                        |                     |                      |                    |           |         |                        |                |                                      |                         |                       |
| 11                                                            | 108127067             | rs1137887              | splice modifier     | G/A                  | 4×10 <sup>-5</sup> | WES imp   | 0.768   | 9.6×10 <sup>-6</sup>   | 65 (20–214)    | 0                                    | 2                       | 0.5                   |
| 11                                                            | 108141801             | rs786203054            | missense            | T/G                  | 7×10 <sup>-6</sup> | BB array  | –       | 1.2×10 <sup>-5</sup>   | 437 (73–2618)  | 0                                    | 2                       | 0.5                   |
| 11                                                            | 108155007             | rs781357995            | frameshift          | AG/A                 | 0.0001             | WES imp   | 0.888   | 3.0×10 <sup>-9</sup>   | 48 (21–111)    | 0                                    | 6                       | 0.031                 |
| 11                                                            | 108172425             | rs587779844            | missense            | C/T                  | 0.0001             | BB array  | –       | 3.5×10 <sup>-20</sup>  | 96 (52–177)    | 0                                    | 12                      | 0.00049               |
| 11                                                            | 108175420             | rs786204751            | stop gained         | C/T                  | 2×10 <sup>-5</sup> | BLVE imp  | 0.467   | 1.6×10 <sup>-4</sup>   | 87 (20–380)    | 0                                    | 1                       | 1                     |
| 11                                                            | 108175528             | rs376603775            | stop gained         | C/T                  | 6×10 <sup>-5</sup> | BLVE imp  | 0.848   | 2.8×10 <sup>-5</sup>   | 44 (14–143)    | 0                                    | 4                       | 0.12                  |
| 11                                                            | 108179837             | rs774925473            | splice modifier     | A/G                  | 8×10 <sup>-5</sup> | BLVE imp  | 0.677   | 6.8×10 <sup>-5</sup>   | 33 (10–104)    | 0                                    | 3                       | 0.25                  |
| 11                                                            | 108181006             | rs56399311             | missense            | A/G                  | 8×10 <sup>-5</sup> | WES imp   | 0.957   | 1.7×10 <sup>-6</sup>   | 44 (16–120)    | 0                                    | 4                       | 0.12                  |
| 11                                                            | 108201108             | rs56399857             | missense            | T/G                  | 0.0002             | WES imp   | 0.921   | 4.9×10 <sup>-5</sup>   | 18 (6.6–48)    | 0                                    | 4                       | 0.12                  |
| 11                                                            | 108202611             | rs587776547            | inframe deletion    | CTCTAGAATT/C         | 7×10 <sup>-5</sup> | WES imp   | 0.754   | 8.5×10 <sup>-9</sup>   | 73 (29–183)    | 0                                    | 5                       | 0.062                 |
| 11                                                            | 108206686             | rs371638537            | stop gained         | A/T                  | 6×10 <sup>-5</sup> | WES imp   | 0.877   | 9.9×10 <sup>-4</sup>   | 33 (8–135)     | 0                                    | 2                       | 0.5                   |
| 11                                                            | 108216545             | rs587779872            | missense            | C/T                  | 2×10 <sup>-5</sup> | WES imp   | 0.594   | 3.6×10 <sup>-11</sup>  | 251 (89–706)   | 0                                    | 5                       | 0.062                 |
| 11                                                            | 108224608             | rs17174393             | splice donor        | G/A                  | 4×10 <sup>-5</sup> | WES imp   | 0.824   | 6.5×10 <sup>-4</sup>   | 41 (10–170)    | 0                                    | 2                       | 0.5                   |
| <b>SH2B3: 2/57 tested variants significant at FDR&lt;0.05</b> |                       |                        |                     |                      |                    |           |         |                        |                |                                      |                         |                       |
| 12                                                            | 111885295             | rs148636776            | missense            | G/A                  | 0.0004             | WES imp   | 0.861   | 4.0×10 <sup>-5</sup>   | 19 (7–50)      | 0                                    | 5                       | 0.062                 |
| 12                                                            | 111885310             | rs72650673             | missense            | G/A                  | 0.002              | WES imp   | 0.882   | 3.1×10 <sup>-8</sup>   | 11 (5.8–20)    | 1                                    | 8                       | 0.039                 |
| <b>TM2D3: 5/15 tested variants significant at FDR&lt;0.05</b> |                       |                        |                     |                      |                    |           |         |                        |                |                                      |                         |                       |
| 15                                                            | 102151467             | 70kb del <sup>g</sup>  | gene deletion       | ref/del              | 0.0003             | array LRR | –       | 9.8×10 <sup>-224</sup> | 555 (425–724)  | 2                                    | 110                     | 2.4×10 <sup>-30</sup> |
| 15                                                            | 102182739             | rs113189685            | missense            | G/T                  | 3×10 <sup>-5</sup> | WES imp   | 0.544   | 2.8×10 <sup>-8</sup>   | 132 (45–389)   | 1                                    | 3                       | 0.62                  |
| 15                                                            | 102182749             | rs754640606            | missense            | G/C                  | 5×10 <sup>-5</sup> | WES imp   | 0.769   | 1.2×10 <sup>-40</sup>  | 544 (289–1025) | 0                                    | 19                      | 3.8×10 <sup>-6</sup>  |
| 15                                                            | 102182761             | rs976377433            | missense            | A/G                  | 3×10 <sup>-5</sup> | WES imp   | 0.761   | 2.3×10 <sup>-8</sup>   | 140 (47–413)   | 0                                    | 4                       | 0.12                  |
| 15                                                            | 102190214             | rs768556490            | frameshift          | G/GT                 | 3×10 <sup>-5</sup> | WES imp   | 0.850   | 8.2×10 <sup>-29</sup>  | 758 (327–1759) | 1                                    | 11                      | 0.0063                |

See next page for caption.

### Caption for Supplementary Table 7.

*P*-values from two independent statistical tests are reported: (i) a two-sided Fisher's exact test treating individuals with a mosaic CN-LOH mutation in *cis* as cases ( $N \geq 378,307$  individuals; Supplementary Table 6); and (ii) a binomial test for biased allelic imbalance in heterozygous cases. Loci reaching  $FDR < 0.05$  significance in the first test (based on the number of variants tested in each gene) are reported. Note that both tests are two-sided (to retain consistency with Extended Data Table 1); *P*-values for biased allelic imbalance in the expected directions (removing rare alleles in *MPL* and duplicating rare alleles in other genes) would be half the values reported in the last column of this table. For full details of statistical tests, see Methods.

<sup>a</sup>Base pair position in hg19 coordinates.

<sup>b</sup>Variant effects according to Ensembl VEP [43] (coding variants) or ClinVar [21] (splice variants).

<sup>c</sup>Reference/alternate allele.

<sup>d</sup>Alternate allele frequency (in UK Biobank European-ancestry individuals).

<sup>e</sup>Number of mosaic individuals heterozygous for the variant in which the somatic event shifted the allelic balance in favor of the reference allele (by duplication of its chromosomal segment and loss of the homologous segment).

<sup>f</sup>This 454bp deletion spans 1:43,814,729-43,815,182, deleting *MPL* exon 10 (Extended Data Fig. 5).

<sup>g</sup>This ~70kb deletion spans 15:102.15-102.22Mb, deleting *TM2D3* and part of *TARSL2* [9].

**Supplementary Table 8. Previously reported CN-LOH risk variants at *MPL* and *ATM* tag likely causal coding variants.**

| Locus      | Previously reported variant [9] | Likely causal coding variant in Extended Data Table 1 | $R^2$ |
|------------|---------------------------------|-------------------------------------------------------|-------|
| <i>MPL</i> | rs182971382                     | rs28928907 (missense)                                 | 0.83  |
| <i>MPL</i> | rs144279563                     | 454bp del (exon 10 deletion)                          | 0.36  |
| <i>MPL</i> | rs369156948                     | rs369156948 (stop gained)                             | 1     |
| <i>ATM</i> | rs532198118                     | rs587779844 (missense)                                | 0.19  |

Note that  $R^2$  reported above may be underestimated due to imputation error.

**Supplementary Table 9. Numbers of distinct coding or splice variants at each risk locus likely to causally drive associations with mosaic CN-LOH events in *cis*.**

| Gene         | Mosaic event | Variants associated at Bonferroni significance | Variants associated at FDR<0.05 significance | Additional coding or splice variants contributing to ultra-rare burden |
|--------------|--------------|------------------------------------------------|----------------------------------------------|------------------------------------------------------------------------|
| <i>MPL</i>   | 1p CN-LOH    | 17                                             | 28                                           | +4                                                                     |
| <i>FH</i>    | 1q CN-LOH    | 1                                              | 1                                            | +2                                                                     |
| <i>NBN</i>   | 8q CN-LOH    | 2                                              | 2                                            | +0                                                                     |
| <i>MRE11</i> | 11q CN-LOH   | 1                                              | 1                                            | +1                                                                     |
| <i>ATM</i>   | 11q CN-LOH   | 10                                             | 13                                           | +6                                                                     |
| <i>SH2B3</i> | 12q CN-LOH   | 2                                              | 2                                            | +5                                                                     |
| <i>TM2D3</i> | 15q CN-LOH   | 5                                              | 5                                            | +3                                                                     |
| Total        |              | 38                                             | 52                                           | +21                                                                    |

This table summarizes the numbers of likely-causal variants at each CN-LOH risk locus identified by our association analyses (Extended Data Table 1 and Supplementary Table 7) and burden analyses (Supplementary Table 10).

**Supplementary Table 10. Burden of additional ultra-rare coding or splice variants in genes frequently targeted by CN-LOH events in *cis*.**

| Gene          | Mosaic event | Exome-sequenced mosaic individuals not carrying FDR-significant variant (Supplementary Table 7) | Carriers of ultra-rare coding or splice variants among these individuals |          |                       |
|---------------|--------------|-------------------------------------------------------------------------------------------------|--------------------------------------------------------------------------|----------|-----------------------|
|               |              |                                                                                                 | Observed                                                                 | Expected | <i>P</i>              |
| <i>MPL</i>    | 1p CN-LOH    | 37                                                                                              | 5                                                                        | 0.067    | $8.4 \times 10^{-9}$  |
| <i>FH</i>     | 1q CN-LOH    | 51                                                                                              | 2                                                                        | 0.132    | 0.0079                |
| <i>NBN</i>    | 8q CN-LOH    | 5                                                                                               | 0                                                                        | 0.017    | 1                     |
| <i>MRE11</i>  | 11q CN-LOH   | 52                                                                                              | 1                                                                        | 0.222    | 0.20                  |
| <i>ATM</i>    | 11q CN-LOH   | 57                                                                                              | 6                                                                        | 0.682    | $6.3 \times 10^{-5}$  |
| <i>SH2B3</i>  | 12q CN-LOH   | 25                                                                                              | 5                                                                        | 0.110    | $8.3 \times 10^{-8}$  |
| <i>TM2D3</i>  | 15q CN-LOH   | 44                                                                                              | 3                                                                        | 0.051    | $2.0 \times 10^{-5}$  |
| <i>DNMT3A</i> | 2p CN-LOH    | 16                                                                                              | 4                                                                        | 0.206    | $4.4 \times 10^{-5}$  |
| <i>TET2</i>   | 4q CN-LOH    | 21                                                                                              | 6                                                                        | 0.197    | $3.3 \times 10^{-8}$  |
| <i>JAK2</i>   | 9p CN-LOH    | 33                                                                                              | 15                                                                       | 0.217    | $1.7 \times 10^{-24}$ |

For each gene, we examined individuals with CN-LOH events spanning the gene (not already explained by any of the 52 variants identified in our association analyses) and tabulated the number of such individuals who carried a rare coding or splice variant under consideration (see Methods). We then computed a burden *P*-value using a one-sided binomial test comparing the observed count to expectation. Note that the counts of observed carriers include two 1p CN-LOH individuals with the same *MPL* variant (rs1362911656, 1:43814994\_T\_C) and fifteen 9p CN-LOH individuals with *JAK2* V617F. An additional five 9p CN-LOH individuals had at least one read supporting *JAK2* V617F (but did not have *JAK2* V617F genotype calls). Allelic read depth analyses indicated that all or most of the rare variant burden in the seven inherited risk loci arose from inherited variants, while all or most of the burden in *DNMT3A*, *TET2*, and *JAK2* arose from somatic point mutations (Extended Data Fig. 8).

**Supplementary Table 11. Rare coding or splice variants carried by exome-sequenced individuals with mosaic CN-LOH events spanning frequently-targeted genes.**

| Gene          | Mosaic event     | Fraction of mosaic individuals with a rare coding/splice variant | Count | Variant                                            | Effect                  |
|---------------|------------------|------------------------------------------------------------------|-------|----------------------------------------------------|-------------------------|
| <i>MPL</i>    | 1p CN-LOH        | 39 / 71<br>(expected: 0.525 / 71)                                | 8     | 1:43804305_G_C                                     | missense                |
|               |                  |                                                                  | 5     | 1:43804396_G_C                                     | splice modifier         |
|               |                  |                                                                  | 4     | 454bp del                                          | exon 10 deletion        |
|               |                  |                                                                  | 3     | 1:43805713_C_T                                     | missense                |
|               |                  |                                                                  | 2     | 1:43804375_CT_C                                    | frameshift              |
|               |                  |                                                                  | 2     | 1:43814994_T_C                                     | missense                |
|               |                  |                                                                  | 1     | 1:43803600_T_A                                     | splice donor            |
|               |                  |                                                                  | 1     | 1:43803903_G_A                                     | splice donor            |
|               |                  |                                                                  | 1     | 1:43804268_C_T                                     | stop gained             |
|               |                  |                                                                  | 1     | 1:43804957_C_G                                     | missense                |
|               |                  |                                                                  | 1     | 1:43805052_G_A                                     | missense                |
|               |                  |                                                                  | 1     | 1:43805059_G_A                                     | missense                |
|               |                  |                                                                  | 1     | 1:43805656_G_T                                     | missense                |
|               |                  |                                                                  | 1     | 1:43805686_C_CCTGG                                 | frameshift              |
|               |                  |                                                                  | 1     | 1:43812115_G_C                                     | splice acceptor         |
|               |                  |                                                                  | 1     | 1:43812574_G_A                                     | missense                |
|               |                  |                                                                  | 1     | 1:43814563_C_G                                     | missense                |
|               |                  |                                                                  | 1     | 1:43814627_G_A                                     | stop gained             |
|               |                  |                                                                  | 1     | 1:43814673_G_T                                     | missense                |
|               |                  |                                                                  | 1     | 1:43815009_G_T                                     | missense                |
| 1             | 1:43818405_C_G   | missense                                                         |       |                                                    |                         |
| <i>FH</i>     | 1q CN-LOH        | 3 / 52<br>(expected: 0.163 / 52)                                 | 1     | 1:241675301_G_C                                    | missense                |
|               |                  |                                                                  | 1     | 1:241675313_C_T                                    | missense                |
|               |                  |                                                                  | 1     | 1:241675443_C_A                                    | missense                |
| <i>NBN</i>    | 8q CN-LOH        | 2 / 7<br>(expected: 0.027 / 7)                                   | 1     | 8:90983420_A_C                                     | missense                |
|               |                  |                                                                  | 1     | 8:90983441_ATTGTGT_A                               | frameshift              |
| <i>MRE11</i>  | 11q CN-LOH       | 2 / 57<br>(expected: 0.247 / 57)                                 | 1     | 11:94189447_G_A                                    | missense                |
|               |                  |                                                                  | 1     | 11:94189489_C_A                                    | stop gained             |
| <i>ATM</i>    | 11q CN-LOH       | 12 / 64<br>(expected: 0.880 / 64)                                | 2     | 11:108155007_AG_A                                  | frameshift              |
|               |                  |                                                                  | 1     | 11:108115595_G_T                                   | missense                |
|               |                  |                                                                  | 1     | 11:108121479_CTG_C                                 | frameshift              |
|               |                  |                                                                  | 1     | 11:108121546_AC_A                                  | frameshift              |
|               |                  |                                                                  | 1     | 11:108127067_G_A                                   | splice modifier         |
|               |                  |                                                                  | 1     | 11:108159805_T_C                                   | missense                |
|               |                  |                                                                  | 1     | 11:108172383_T_C                                   | missense                |
|               |                  |                                                                  | 1     | 11:108179837_A_G                                   | splice modifier         |
|               |                  |                                                                  | 1     | 11:108199833_G_A                                   | missense                |
|               |                  |                                                                  | 1     | 11:108202611_CTCTAGAATT_C                          | inframe deletion        |
| 1             | 11:108216545_C_T | missense                                                         |       |                                                    |                         |
| <i>SH2B3</i>  | 12q CN-LOH       | 6 / 26<br>(expected: 0.226 / 26)                                 | 1     | 12:111856537_G_GT                                  | frameshift              |
|               |                  |                                                                  | 1     | 12:111856620_T_TGC                                 | frameshift              |
|               |                  |                                                                  | 1     | 12:111856623_G_GCCGGGCC                            | frameshift              |
|               |                  |                                                                  | 1     | 12:111884838_G_A                                   | splice donor            |
|               |                  |                                                                  | 1     | 12:111885295_G_A                                   | missense                |
| 1             | 12:111885497_G_A | missense                                                         |       |                                                    |                         |
| <i>TM2D3</i>  | 15q CN-LOH       | 20 / 61<br>(expected: 0.131 / 61)                                | 8     | 70kb del                                           | gene deletion           |
|               |                  |                                                                  | 4     | 15:102190214_G_GT                                  | frameshift              |
|               |                  |                                                                  | 3     | 15:102182749_G_C                                   | missense                |
|               |                  |                                                                  | 2     | 15:102182739_G_T                                   | missense                |
|               |                  |                                                                  | 1     | 15:102187018_A_G                                   | missense                |
|               |                  |                                                                  | 1     | 15:102192520_A_T                                   | stop gained             |
|               |                  |                                                                  | 1     | 15:102192558_C_A                                   | stop gained             |
| <i>DNMT3A</i> | 2p CN-LOH        | 4 / 16<br>(expected: 0.206 / 16)                                 | 1     | 2:25463194_T_C                                     | missense                |
|               |                  |                                                                  | 1     | 2:25463218_C_T                                     | missense                |
|               |                  |                                                                  | 1     | 2:25463248_G_A                                     | missense                |
|               |                  |                                                                  | 1     | 2:25463536_C_T                                     | missense                |
| <i>TET2</i>   | 4q CN-LOH        | 6 / 21<br>(expected: 0.197 / 21)                                 | 1     | 4:106157029_C_T                                    | stop gained             |
|               |                  |                                                                  | 1     | 4:106157446_G_T, 4:106157983_C_T, 4:106193937_AG_A | stop gained, frameshift |
|               |                  |                                                                  | 1     | 4:106164061_C_T                                    | stop gained             |
|               |                  |                                                                  | 1     | 4:106164085_G_GT                                   | splice donor            |
|               |                  |                                                                  | 1     | 4:106180896_G_GT                                   | frameshift              |
|               |                  |                                                                  | 1     | 4:106197285_T_C                                    | missense                |
| <i>JAK2</i>   | 9p CN-LOH        | 15 / 33<br>(expected: 0.217 / 33)                                | 15    | 9:5073770_G_T                                      | missense                |



### **Caption for Supplementary Table 11.**

This table lists variants found in exome-sequenced mosaic CN-LOH individuals at each locus at which inherited or somatic variants are targets of clonal CN-LOH events. Variants identified by our association analyses (Extended Data Table 1 and Supplementary Table 7) and burden analyses (Supplementary Table 10) are both included. Allelic read depth analyses indicated that all or most of the variants found in the seven inherited risk loci arose from inherited variants, while all or most of the variants found in *DNMT3A*, *TET2*, and *JAK2* arose from somatic point mutations (Extended Data Fig. 8). We note that while this table indicates that fifteen individuals with 9p CN-LOH events were carriers of *JAK2* V617F (9:5073770\_G\_T), an additional five 9p CN-LOH individuals had at least one read supporting *JAK2* V617F (but did not have *JAK2* V617F genotype calls). One individual with 4q CN-LOH appeared to have three distinct somatic mutations in *TET2*.

**Supplementary Table 12. Associations of mosaic CN-LOH mutations with inherited common variants in *cis*.**

| Arm                                                                              | Locus        | Position <sup>a</sup> | Variant                 | Alleles <sup>b</sup> | AF <sup>c</sup> | GWAS                  |                  | Allelic shift in hets                |                         |                      |                              |
|----------------------------------------------------------------------------------|--------------|-----------------------|-------------------------|----------------------|-----------------|-----------------------|------------------|--------------------------------------|-------------------------|----------------------|------------------------------|
|                                                                                  |              |                       |                         |                      |                 | <i>P</i>              | OR (95% CI)      | <i>N</i> <sub>REF</sub> <sup>d</sup> | <i>N</i> <sub>ALT</sub> | <i>P</i>             | <i>P</i> <sub>combined</sub> |
| <b>Novel common variant associations with CN-LOH in <i>cis</i></b>               |              |                       |                         |                      |                 |                       |                  |                                      |                         |                      |                              |
| 14q                                                                              | <i>TCLIA</i> | 96180695              | rs2887399               | G/T                  | 0.20            | 0.0024                | 0.84 (0.75–0.94) | 195                                  | 102                     | $7.4 \times 10^{-8}$ | $4.2 \times 10^{-9}$         |
| 14q                                                                              | <i>DLK1</i>  | 101172227             | rs7141110               | G/C                  | 0.22            | $1.4 \times 10^{-5}$  | 1.24 (1.13–1.37) | 252                                  | 162                     | $1.1 \times 10^{-5}$ | $3.6 \times 10^{-9}$         |
| <b>Previously reported common variant associations with CN-LOH in <i>cis</i></b> |              |                       |                         |                      |                 |                       |                  |                                      |                         |                      |                              |
| 9p                                                                               | <i>JAK2</i>  | 5037393               | rs75032480 <sup>e</sup> | A/C                  | 0.26            | $2.6 \times 10^{-29}$ | 2.29 (1.99–2.63) | 31                                   | 170                     | $2 \times 10^{-24}$  | $6.3 \times 10^{-51}$        |

*P*-values from two independent statistical tests are reported: (i) a two-sided Fisher’s exact test treating individuals with a mosaic CN-LOH mutation in *cis* as cases ( $N \geq 379,201$  individuals; Supplementary Table 6); and (ii) a binomial test for biased allelic imbalance in heterozygous cases. Loci reaching genome-wide significance in the combination of the tests (Fisher’s combined *P*) are reported. For full details of statistical tests, see Methods.

<sup>a</sup>Base pair position in hg19 coordinates.

<sup>b</sup>Reference/alternate allele.

<sup>c</sup>Alternate allele frequency (in UK Biobank European-ancestry individuals).

<sup>d</sup>Number of mosaic individuals heterozygous for the variant in which the somatic event shifted the allelic balance in favor of the reference allele (by duplication of its chromosomal segment and loss of the homologous segment).

<sup>e</sup>rs75032480 belongs to the *JAK2* 46/1 haplotype [50–52].

**Supplementary Table 13. Common variants associated with detectable mosaic chromosomal alterations on any autosome.**

| Locus        | Variant      | Chr       | Position  | REF/ALT     | AAF              | OR (95% CI)          | <i>P</i>              |
|--------------|--------------|-----------|-----------|-------------|------------------|----------------------|-----------------------|
| <i>SPI40</i> | rs13023767   | 2         | 231122057 | T/G         | 0.25             | 1.07 (1.05–1.10)     | $2.3 \times 10^{-8}$  |
|              | rs776205558  | 2         | 231122089 | CAGTA/C     | 0.25             | 1.07 (1.05–1.10)     | $3.2 \times 10^{-8}$  |
|              | rs55657711   | 2         | 231122210 | A/G         | 0.30             | 1.07 (1.05–1.10)     | $2.0 \times 10^{-8}$  |
|              | rs62191185   | 2         | 231122290 | G/A         | 0.42             | 1.06 (1.04–1.09)     | $4.0 \times 10^{-8}$  |
|              | rs1356532206 | 2         | 231124230 | TA/T        | 0.26             | 1.07 (1.05–1.10)     | $3.3 \times 10^{-8}$  |
|              | rs6755306    | 2         | 231126528 | G/A         | 0.25             | 1.08 (1.05–1.10)     | $1.2 \times 10^{-8}$  |
|              | rs1582833    | 2         | 231129729 | C/G         | 0.31             | 1.07 (1.05–1.10)     | $1.7 \times 10^{-8}$  |
|              | rs62191195   | 2         | 231129794 | C/T         | 0.25             | 1.08 (1.05–1.10)     | $9.4 \times 10^{-9}$  |
|              | rs34790921   | 2         | 231130508 | G/T         | 0.25             | 1.08 (1.05–1.10)     | $1.2 \times 10^{-8}$  |
|              | rs890581     | 2         | 231131387 | G/A         | 0.25             | 1.08 (1.05–1.10)     | $9.7 \times 10^{-9}$  |
|              | rs767031837  | 2         | 231134078 | AGCGTG/A    | 0.25             | 1.08 (1.05–1.10)     | $1.2 \times 10^{-8}$  |
|              | rs62191198   | 2         | 231141196 | C/G         | 0.25             | 1.08 (1.05–1.10)     | $9.5 \times 10^{-9}$  |
|              | rs12694846   | 2         | 231148128 | A/G         | 0.27             | 1.07 (1.05–1.10)     | $2.1 \times 10^{-8}$  |
|              | rs34004493   | 2         | 231154012 | A/G         | 0.27             | 1.07 (1.05–1.10)     | $2.6 \times 10^{-8}$  |
|              | rs6710297    | 2         | 231157512 | A/G         | 0.27             | 1.07 (1.05–1.10)     | $2.2 \times 10^{-8}$  |
|              | rs35256947   | 2         | 231161026 | T/C         | 0.27             | 1.07 (1.05–1.10)     | $2.0 \times 10^{-8}$  |
|              | rs13007094   | 2         | 231171194 | C/T         | 0.25             | 1.08 (1.05–1.10)     | $1.1 \times 10^{-8}$  |
| rs2396742    | 2            | 231171423 | C/T       | 0.25        | 1.08 (1.05–1.10) | $1.9 \times 10^{-8}$ |                       |
| <i>TERC</i>  | rs12638862   | 3         | 169477506 | A/G         | 0.26             | 0.93 (0.91–0.96)     | $2.9 \times 10^{-8}$  |
|              | rs9811216    | 3         | 169487501 | T/C         | 0.26             | 0.93 (0.91–0.96)     | $3.4 \times 10^{-8}$  |
| <i>TERT</i>  | rs33961405   | 5         | 1277577   | G/A         | 0.52             | 0.93 (0.91–0.96)     | $6.4 \times 10^{-9}$  |
|              | rs10054203   | 5         | 1279964   | G/C         | 0.40             | 1.07 (1.05–1.10)     | $3.0 \times 10^{-9}$  |
|              | rs7734992    | 5         | 1280128   | T/C         | 0.42             | 1.09 (1.06–1.11)     | $4.2 \times 10^{-13}$ |
|              | rs4975538    | 5         | 1280830   | G/C         | 0.36             | 1.08 (1.05–1.10)     | $1.2 \times 10^{-10}$ |
|              | rs6897196    | 5         | 1280938   | A/G         | 0.39             | 1.08 (1.06–1.10)     | $5.6 \times 10^{-11}$ |
|              | rs749685059  | 5         | 1280940   | GAGCCCACC/G | 0.38             | 1.08 (1.06–1.11)     | $8.0 \times 10^{-12}$ |
|              | rs7726159    | 5         | 1282319   | C/A         | 0.33             | 1.10 (1.07–1.12)     | $2.8 \times 10^{-14}$ |
|              | rs7725218    | 5         | 1282414   | G/A         | 0.34             | 1.09 (1.06–1.11)     | $2.0 \times 10^{-12}$ |
|              | rs4449583    | 5         | 1284135   | C/T         | 0.33             | 1.10 (1.07–1.12)     | $2.3 \times 10^{-14}$ |
|              | rs7705526    | 5         | 1285974   | C/A         | 0.33             | 1.11 (1.08–1.14)     | $6.9 \times 10^{-18}$ |
|              | rs2736100    | 5         | 1286516   | C/A         | 0.50             | 0.92 (0.90–0.94)     | $1.2 \times 10^{-12}$ |
|              | rs2853677    | 5         | 1287194   | G/A         | 0.58             | 0.94 (0.92–0.96)     | $9.5 \times 10^{-9}$  |

Results from BOLT-LMM [26, 47] analysis of the “any autosomal mCA” phenotype in  $N=452,469$  individuals are reported for all common variants ( $MAF > 0.05$ ) passing a significance threshold of  $P < 5 \times 10^{-8}$ . AAF = ALT allele frequency; the ALT allele is the effect allele for reported odds ratios.

**Supplementary Table 14. Associations of telomere length SNPs with mosaic chromosomal alterations on any autosome.**

| Locus         | SNP        | Chr | Position  | Alleles | EAF   | $\beta_{\text{telo}}$ (s.e.) | $P_{\text{telo}}$     | $\beta_{\text{mCA}}$ (s.e.) | $P_{\text{mCA}}$      |
|---------------|------------|-----|-----------|---------|-------|------------------------------|-----------------------|-----------------------------|-----------------------|
| <i>TERC</i>   | rs10936599 | 3   | 169492101 | T/C     | 0.252 | -0.097 (0.008)               | $2.5 \times 10^{-31}$ | -0.0024 (0.0005)            | $1.1 \times 10^{-7}$  |
| <i>TERT</i>   | rs2736100  | 5   | 1286516   | A/C     | 0.514 | -0.078 (0.009)               | $4.4 \times 10^{-19}$ | -0.0028 (0.0004)            | $1.2 \times 10^{-12}$ |
| <i>NAF1</i>   | rs7675998  | 4   | 164007820 | A/G     | 0.217 | -0.074 (0.009)               | $4.4 \times 10^{-16}$ | -0.0006 (0.0005)            | $2.0 \times 10^{-1}$  |
| <i>OBFC1</i>  | rs9420907  | 10  | 105676465 | A/C     | 0.865 | -0.069 (0.010)               | $6.9 \times 10^{-11}$ | -0.0019 (0.0006)            | $1.1 \times 10^{-3}$  |
| <i>ZNF208</i> | rs8105767  | 19  | 22215441  | A/G     | 0.709 | -0.048 (0.008)               | $1.1 \times 10^{-9}$  | -0.0005 (0.0004)            | $2.8 \times 10^{-1}$  |
| <i>RTEL1</i>  | rs755017   | 20  | 62421622  | A/G     | 0.869 | -0.062 (0.011)               | $6.7 \times 10^{-9}$  | -0.0014 (0.0006)            | $1.5 \times 10^{-2}$  |
| <i>ACYP2</i>  | rs11125529 | 2   | 54475866  | C/A     | 0.858 | -0.056 (0.010)               | $4.5 \times 10^{-8}$  | 0.0002 (0.0006)             | $7.9 \times 10^{-1}$  |

Results from BOLT-LMM [26, 47] analysis of the “any autosomal mCA” phenotype in  $N=452,469$  individuals are reported for variants previously associated with telomere length [64]. Alleles, effect allele / other allele. EAF, effect allele frequency as reported by ref. [64].  $\beta_{\text{telo}}$  (s.e.) and  $P_{\text{telo}}$ , effect size and association  $P$ -value for telomere length reported by ref. [64].  $\beta_{\text{mCA}}$  (s.e.) and  $P_{\text{mCA}}$ , effect size and association  $P$ -value for presence of an mCA on any autosome.

**Supplementary Table 15. Mean changes in polygenic scores for blood count and Y loss traits produced by CN-LOH mutations.**

| Arm | <i>N</i> | Platelet #              | Red cell #              | Basophil #             | Neutrophil #           | Eosinophil #           | Monocyte #             | Lymphocyte #           | Y loss risk             |
|-----|----------|-------------------------|-------------------------|------------------------|------------------------|------------------------|------------------------|------------------------|-------------------------|
| 1p  | 927      | <b>-0.0632 (0.0055)</b> | 0.0032 (0.0022)         | -0.0003 (0.0006)       | 0.0005 (0.0022)        | 0.0013 (0.0021)        | 0.0022 (0.0022)        | -0.0011 (0.0020)       | 0.0003 (0.0004)         |
| 1q  | 694      | 0.0056 (0.0040)         | -0.0029 (0.0030)        | 0.0003 (0.0013)        | 0.0034 (0.0027)        | -0.0045 (0.0023)       | -0.0037 (0.0031)       | 0.0002 (0.0022)        | 0.0011 (0.0006)         |
| 2p  | 169      | 0.0026 (0.0053)         | 0.0035 (0.0056)         | 0.0020 (0.0011)        | 0.0061 (0.0039)        | 0.0071 (0.0038)        | -0.0023 (0.0035)       | 0.0035 (0.0042)        | -0.0006 (0.0010)        |
| 2q  | 205      | <b>0.0192 (0.0059)</b>  | 0.0055 (0.0046)         | 0.0014 (0.0015)        | <b>0.0153 (0.0063)</b> | 0.0048 (0.0048)        | 0.0094 (0.0068)        | 0.0043 (0.0043)        | <b>-0.0014 (0.0007)</b> |
| 3p  | 164      | 0.0007 (0.0057)         | 0.0053 (0.0042)         | 0.0013 (0.0017)        | <b>0.0082 (0.0030)</b> | -0.0066 (0.0043)       | 0.0045 (0.0059)        | 0.0016 (0.0042)        | 0.0011 (0.0009)         |
| 3q  | 195      | 0.0084 (0.0062)         | -0.0080 (0.0047)        | 0.0016 (0.0014)        | <b>0.0087 (0.0036)</b> | 0.0051 (0.0045)        | <b>0.0093 (0.0047)</b> | 0.0015 (0.0035)        | 0.0015 (0.0013)         |
| 4p  | 61       | 0.0018 (0.0060)         | 0.0037 (0.0034)         | 0.0000 (0.0009)        | 0.0054 (0.0043)        | 0.0001 (0.0043)        | <b>0.0107 (0.0040)</b> | 0.0028 (0.0043)        | 0.0010 (0.0009)         |
| 4q  | 237      | 0.0004 (0.0038)         | -0.0012 (0.0040)        | 0.0000 (0.0010)        | 0.0008 (0.0037)        | 0.0014 (0.0030)        | 0.0006 (0.0034)        | -0.0011 (0.0035)       | 0.0005 (0.0006)         |
| 5p  | 71       | 0.0004 (0.0049)         | 0.0003 (0.0044)         | -0.0002 (0.0009)       | 0.0061 (0.0041)        | -0.0069 (0.0038)       | <b>0.0099 (0.0025)</b> | -0.0022 (0.0035)       | -0.0001 (0.0009)        |
| 5q  | 162      | 0.0094 (0.0052)         | -0.0001 (0.0037)        | 0.0018 (0.0011)        | 0.0000 (0.0042)        | 0.0011 (0.0064)        | <b>0.0104 (0.0047)</b> | 0.0006 (0.0037)        | 0.0004 (0.0009)         |
| 6p  | 327      | <b>-0.0090 (0.0043)</b> | -0.0050 (0.0036)        | 0.0003 (0.0008)        | -0.0006 (0.0027)       | 0.0045 (0.0036)        | 0.0035 (0.0035)        | 0.0004 (0.0034)        | 0.0008 (0.0005)         |
| 6q  | 116      | -0.0037 (0.0086)        | -0.0011 (0.0106)        | 0.0005 (0.0013)        | 0.0004 (0.0035)        | 0.0036 (0.0050)        | 0.0028 (0.0053)        | 0.0031 (0.0048)        | 0.0021 (0.0018)         |
| 7p  | 90       | 0.0039 (0.0044)         | 0.0024 (0.0047)         | -0.0012 (0.0018)       | -0.0047 (0.0050)       | 0.0009 (0.0052)        | 0.0046 (0.0052)        | 0.0002 (0.0047)        | 0.0007 (0.0015)         |
| 7q  | 167      | 0.0007 (0.0062)         | -0.0030 (0.0050)        | -0.0018 (0.0017)       | 0.0024 (0.0031)        | 0.0039 (0.0043)        | 0.0037 (0.0035)        | 0.0006 (0.0034)        | <b>0.0030 (0.0013)</b>  |
| 8p  | 80       | 0.0058 (0.0035)         | 0.0013 (0.0038)         | -0.0032 (0.0031)       | -0.0037 (0.0042)       | -0.0030 (0.0037)       | 0.0018 (0.0052)        | -0.0029 (0.0042)       | 0.0010 (0.0008)         |
| 8q  | 134      | -0.0025 (0.0057)        | -0.0002 (0.0038)        | 0.0002 (0.0012)        | 0.0001 (0.0041)        | 0.0010 (0.0045)        | -0.0011 (0.0068)       | -0.0005 (0.0057)       | 0.0004 (0.0008)         |
| 9p  | 386      | -0.0081 (0.0054)        | 0.0043 (0.0023)         | 0.0004 (0.0004)        | <b>0.0053 (0.0019)</b> | 0.0067 (0.0034)        | -0.0028 (0.0019)       | -0.0035 (0.0019)       | 0.0001 (0.0003)         |
| 9q  | 472      | 0.0050 (0.0039)         | -0.0029 (0.0033)        | -0.0002 (0.0006)       | 0.0004 (0.0024)        | 0.0024 (0.0026)        | -0.0085 (0.0044)       | 0.0003 (0.0021)        | -0.0002 (0.0006)        |
| 10p | 50       | 0.0059 (0.0059)         | -0.0005 (0.0062)        | -0.0003 (0.0037)       | 0.0053 (0.0041)        | 0.0050 (0.0075)        | 0.0011 (0.0054)        | -0.0031 (0.0053)       | -0.0009 (0.0009)        |
| 10q | 85       | -0.0029 (0.0077)        | -0.0024 (0.0054)        | -0.0005 (0.0021)       | 0.0086 (0.0055)        | 0.0105 (0.0053)        | 0.0017 (0.0065)        | 0.0020 (0.0050)        | -0.0001 (0.0008)        |
| 11p | 564      | 0.0012 (0.0031)         | 0.0014 (0.0022)         | 0.0007 (0.0004)        | 0.0006 (0.0019)        | 0.0032 (0.0017)        | -0.0015 (0.0018)       | 0.0002 (0.0014)        | -0.0001 (0.0004)        |
| 11q | 647      | 0.0049 (0.0032)         | <b>0.0084 (0.0019)</b>  | -0.0004 (0.0011)       | 0.0039 (0.0021)        | 0.0024 (0.0023)        | 0.0007 (0.0023)        | 0.0014 (0.0020)        | <b>0.0032 (0.0005)</b>  |
| 12p | 88       | 0.0012 (0.0079)         | <b>-0.0122 (0.0055)</b> | -0.0000 (0.0016)       | 0.0016 (0.0036)        | -0.0012 (0.0060)       | -0.0072 (0.0052)       | 0.0154 (0.0081)        | -0.0001 (0.0022)        |
| 12q | 302      | <b>0.0358 (0.0090)</b>  | <b>0.0105 (0.0041)</b>  | 0.0015 (0.0011)        | <b>0.0112 (0.0034)</b> | <b>0.0180 (0.0042)</b> | <b>0.0115 (0.0035)</b> | <b>0.0154 (0.0041)</b> | 0.0003 (0.0007)         |
| 13q | 623      | -0.0002 (0.0028)        | -0.0024 (0.0020)        | 0.0000 (0.0005)        | -0.0005 (0.0017)       | -0.0006 (0.0019)       | -0.0068 (0.0036)       | -0.0002 (0.0023)       | 0.0004 (0.0005)         |
| 14q | 956      | <b>0.0097 (0.0029)</b>  | 0.0023 (0.0017)         | -0.0008 (0.0005)       | <b>0.0036 (0.0015)</b> | <b>0.0038 (0.0018)</b> | 0.0024 (0.0019)        | 0.0003 (0.0015)        | <b>0.0039 (0.0007)</b>  |
| 15q | 638      | 0.0042 (0.0025)         | -0.0016 (0.0024)        | 0.0003 (0.0009)        | -0.0028 (0.0018)       | 0.0016 (0.0021)        | -0.0001 (0.0025)       | 0.0031 (0.0020)        | -0.0005 (0.0003)        |
| 16p | 318      | -0.0019 (0.0025)        | 0.0040 (0.0029)         | <b>0.0011 (0.0004)</b> | 0.0010 (0.0016)        | 0.0018 (0.0029)        | 0.0008 (0.0020)        | 0.0008 (0.0020)        | 0.0002 (0.0003)         |
| 16q | 280      | -0.0015 (0.0034)        | <b>0.0071 (0.0034)</b>  | 0.0002 (0.0007)        | 0.0015 (0.0027)        | 0.0003 (0.0028)        | -0.0034 (0.0068)       | 0.0008 (0.0026)        | -0.0004 (0.0007)        |
| 17p | 224      | 0.0037 (0.0055)         | -0.0030 (0.0033)        | -0.0015 (0.0015)       | -0.0039 (0.0049)       | 0.0023 (0.0043)        | -0.0038 (0.0046)       | -0.0036 (0.0045)       | -0.0001 (0.0008)        |
| 17q | 521      | 0.0012 (0.0034)         | -0.0015 (0.0028)        | 0.0007 (0.0011)        | 0.0005 (0.0034)        | -0.0019 (0.0026)       | -0.0007 (0.0035)       | 0.0022 (0.0026)        | 0.0001 (0.0005)         |
| 18p | 36       | -0.0011 (0.0046)        | -0.0036 (0.0046)        | -0.0006 (0.0010)       | -0.0029 (0.0039)       | 0.0034 (0.0039)        | 0.0020 (0.0037)        | -0.0028 (0.0025)       | -0.0006 (0.0011)        |
| 18q | 127      | 0.0039 (0.0042)         | 0.0049 (0.0037)         | <b>0.0044 (0.0014)</b> | <b>0.0074 (0.0035)</b> | <b>0.0136 (0.0040)</b> | 0.0058 (0.0043)        | -0.0003 (0.0031)       | <b>0.0097 (0.0027)</b>  |
| 19p | 189      | 0.0001 (0.0037)         | 0.0027 (0.0044)         | 0.0026 (0.0013)        | 0.0019 (0.0034)        | -0.0027 (0.0035)       | -0.0029 (0.0047)       | -0.0033 (0.0050)       | 0.0006 (0.0006)         |
| 19q | 267      | 0.0021 (0.0035)         | 0.0014 (0.0030)         | 0.0020 (0.0012)        | 0.0023 (0.0029)        | -0.0011 (0.0029)       | -0.0010 (0.0043)       | -0.0005 (0.0024)       | 0.0002 (0.0005)         |
| 20p | 62       | -0.0018 (0.0049)        | -0.0011 (0.0031)        | 0.0002 (0.0013)        | -0.0027 (0.0032)       | -0.0035 (0.0033)       | -0.0035 (0.0048)       | -0.0039 (0.0049)       | 0.0003 (0.0007)         |
| 20q | 210      | 0.0070 (0.0039)         | 0.0023 (0.0036)         | 0.0005 (0.0009)        | 0.0013 (0.0022)        | 0.0009 (0.0021)        | 0.0052 (0.0043)        | 0.0001 (0.0029)        | 0.0005 (0.0006)         |
| 21q | 244      | <b>0.0058 (0.0027)</b>  | 0.0011 (0.0028)         | -0.0004 (0.0007)       | <b>0.0035 (0.0017)</b> | 0.0066 (0.0034)        | 0.0020 (0.0020)        | 0.0021 (0.0018)        | 0.0004 (0.0004)         |
| 22q | 550      | 0.0052 (0.0030)         | 0.0044 (0.0026)         | 0.0009 (0.0006)        | 0.0013 (0.0013)        | -0.0007 (0.0021)       | 0.0005 (0.0019)        | 0.0011 (0.0020)        | <b>0.0008 (0.0004)</b>  |
| Any | 11,638   | -0.0014 (0.0008)        | <b>0.0012 (0.0006)</b>  | 0.0003 (0.0002)        | <b>0.0022 (0.0005)</b> | <b>0.0020 (0.0005)</b> | 0.0004 (0.0006)        | 0.0009 (0.0005)        | <b>0.0009 (0.0001)</b>  |

This table provides numerical data plotted in Fig. 2b. Units for polygenic scores are standard deviations for blood count traits; for Y loss, polygenic scores were computed on a 0/1 binary trait (modeled additively). Mean changes in polygenic scores reaching nominal significance ( $P < 0.05$  before multiple hypothesis correction) are indicated in bold; those that reached significance at FDR 0.05 or after Bonferroni correction are indicated in Fig. 2b.

**Supplementary Table 16. Mean changes in polygenic scores for six non-blood-related control traits produced by CN-LOH mutations.**

| Arm | <i>N</i> | Height                 | BMI                     | Bone mineral density   | FEV1/FVC                | Blood pressure (systolic) | Blood pressure (diastolic) |
|-----|----------|------------------------|-------------------------|------------------------|-------------------------|---------------------------|----------------------------|
| 1p  | 927      | -0.0027 (0.0031)       | -0.0033 (0.0019)        | -0.0012 (0.0028)       | <i>-0.0055 (0.0021)</i> | -0.0022 (0.0021)          | -0.0009 (0.0019)           |
| 1q  | 694      | 0.0015 (0.0039)        | -0.0001 (0.0022)        | 0.0017 (0.0030)        | -0.0006 (0.0025)        | <i>0.0041 (0.0019)</i>    | 0.0038 (0.0021)            |
| 2p  | 169      | 0.0047 (0.0072)        | -0.0065 (0.0048)        | 0.0035 (0.0057)        | -0.0070 (0.0046)        | -0.0005 (0.0038)          | -0.0017 (0.0040)           |
| 2q  | 205      | 0.0042 (0.0075)        | 0.0017 (0.0043)         | -0.0065 (0.0060)       | -0.0054 (0.0051)        | <i>0.0092 (0.0039)</i>    | <i>0.0082 (0.0039)</i>     |
| 3p  | 164      | -0.0063 (0.0056)       | 0.0023 (0.0039)         | 0.0057 (0.0045)        | -0.0010 (0.0043)        | <i>0.0081 (0.0037)</i>    | 0.0047 (0.0034)            |
| 3q  | 195      | 0.0082 (0.0066)        | <i>0.0083 (0.0042)</i>  | -0.0026 (0.0041)       | -0.0061 (0.0039)        | -0.0036 (0.0034)          | -0.0017 (0.0036)           |
| 4p  | 61       | 0.0105 (0.0090)        | 0.0049 (0.0052)         | 0.0010 (0.0069)        | -0.0036 (0.0039)        | -0.0041 (0.0044)          | -0.0011 (0.0041)           |
| 4q  | 237      | 0.0049 (0.0065)        | 0.0007 (0.0034)         | -0.0035 (0.0044)       | -0.0007 (0.0053)        | 0.0027 (0.0039)           | 0.0019 (0.0038)            |
| 5p  | 71       | -0.0036 (0.0061)       | 0.0021 (0.0049)         | -0.0010 (0.0047)       | -0.0044 (0.0046)        | 0.0003 (0.0045)           | 0.0034 (0.0038)            |
| 5q  | 162      | 0.0107 (0.0081)        | 0.0004 (0.0044)         | -0.0028 (0.0048)       | -0.0074 (0.0059)        | -0.0057 (0.0036)          | -0.0023 (0.0038)           |
| 6p  | 327      | -0.0026 (0.0046)       | -0.0016 (0.0025)        | -0.0035 (0.0030)       | <i>0.0071 (0.0034)</i>  | 0.0027 (0.0021)           | 0.0011 (0.0022)            |
| 6q  | 116      | 0.0087 (0.0095)        | 0.0005 (0.0044)         | 0.0077 (0.0104)        | 0.0001 (0.0059)         | 0.0075 (0.0040)           | <i>0.0111 (0.0041)</i>     |
| 7p  | 90       | -0.0065 (0.0089)       | <i>0.0109 (0.0043)</i>  | -0.0013 (0.0075)       | -0.0038 (0.0043)        | -0.0038 (0.0049)          | -0.0028 (0.0042)           |
| 7q  | 167      | 0.0015 (0.0057)        | -0.0068 (0.0037)        | -0.0008 (0.0088)       | -0.0016 (0.0035)        | -0.0015 (0.0036)          | 0.0016 (0.0036)            |
| 8p  | 80       | 0.0017 (0.0066)        | -0.0022 (0.0039)        | -0.0017 (0.0047)       | 0.0009 (0.0038)         | 0.0039 (0.0046)           | 0.0032 (0.0045)            |
| 8q  | 134      | 0.0096 (0.0079)        | -0.0045 (0.0040)        | 0.0009 (0.0049)        | <i>-0.0085 (0.0037)</i> | 0.0070 (0.0044)           | 0.0071 (0.0040)            |
| 9p  | 386      | 0.0039 (0.0025)        | -0.0010 (0.0020)        | -0.0014 (0.0021)       | -0.0012 (0.0019)        | -0.0017 (0.0016)          | -0.0014 (0.0014)           |
| 9q  | 472      | 0.0035 (0.0050)        | 0.0041 (0.0024)         | -0.0051 (0.0028)       | 0.0004 (0.0025)         | 0.0001 (0.0019)           | -0.0003 (0.0021)           |
| 10p | 50       | 0.0014 (0.0073)        | -0.0007 (0.0041)        | 0.0149 (0.0080)        | 0.0019 (0.0066)         | 0.0084 (0.0048)           | 0.0076 (0.0053)            |
| 10q | 85       | -0.0105 (0.0073)       | 0.0028 (0.0056)         | 0.0117 (0.0078)        | -0.0031 (0.0054)        | -0.0045 (0.0058)          | -0.0051 (0.0060)           |
| 11p | 564      | -0.0002 (0.0028)       | -0.0016 (0.0019)        | -0.0037 (0.0024)       | <i>-0.0035 (0.0016)</i> | -0.0009 (0.0021)          | -0.0014 (0.0021)           |
| 11q | 647      | 0.0020 (0.0027)        | -0.0017 (0.0021)        | -0.0017 (0.0033)       | 0.0016 (0.0020)         | -0.0002 (0.0021)          | <i>0.0050 (0.0020)</i>     |
| 12p | 88       | 0.0033 (0.0083)        | -0.0019 (0.0046)        | 0.0003 (0.0061)        | 0.0059 (0.0052)         | -0.0014 (0.0041)          | 0.0027 (0.0044)            |
| 12q | 302      | 0.0022 (0.0059)        | 0.0009 (0.0031)         | -0.0001 (0.0037)       | 0.0017 (0.0029)         | 0.0026 (0.0031)           | <i>0.0067 (0.0032)</i>     |
| 13q | 623      | -0.0016 (0.0031)       | 0.0016 (0.0022)         | -0.0048 (0.0028)       | -0.0011 (0.0021)        | -0.0007 (0.0017)          | -0.0024 (0.0018)           |
| 14q | 956      | 0.0005 (0.0028)        | -0.0006 (0.0017)        | 0.0019 (0.0020)        | -0.0023 (0.0017)        | 0.0008 (0.0015)           | 0.0004 (0.0014)            |
| 15q | 638      | -0.0079 (0.0047)       | 0.0021 (0.0020)         | -0.0036 (0.0024)       | -0.0025 (0.0029)        | 0.0006 (0.0020)           | 0.0002 (0.0023)            |
| 16p | 318      | 0.0013 (0.0035)        | <i>-0.0064 (0.0025)</i> | 0.0005 (0.0026)        | -0.0035 (0.0019)        | -0.0034 (0.0020)          | -0.0026 (0.0020)           |
| 16q | 280      | 0.0015 (0.0043)        | 0.0028 (0.0033)         | <i>0.0123 (0.0035)</i> | <i>0.0086 (0.0029)</i>  | 0.0014 (0.0022)           | <i>0.0053 (0.0022)</i>     |
| 17p | 224      | 0.0034 (0.0059)        | 0.0024 (0.0030)         | 0.0004 (0.0049)        | 0.0009 (0.0034)         | -0.0050 (0.0031)          | 0.0008 (0.0028)            |
| 17q | 521      | 0.0053 (0.0047)        | -0.0027 (0.0021)        | 0.0000 (0.0036)        | -0.0020 (0.0026)        | -0.0041 (0.0023)          | -0.0028 (0.0020)           |
| 18p | 36       | -0.0076 (0.0058)       | 0.0087 (0.0048)         | 0.0025 (0.0077)        | -0.0045 (0.0052)        | 0.0003 (0.0051)           | -0.0032 (0.0039)           |
| 18q | 127      | -0.0042 (0.0049)       | -0.0034 (0.0046)        | -0.0019 (0.0036)       | -0.0014 (0.0032)        | -0.0012 (0.0034)          | -0.0026 (0.0034)           |
| 19p | 189      | 0.0005 (0.0048)        | -0.0026 (0.0025)        | -0.0044 (0.0038)       | -0.0016 (0.0023)        | -0.0042 (0.0030)          | -0.0021 (0.0028)           |
| 19q | 267      | <i>0.0091 (0.0034)</i> | <i>-0.0046 (0.0022)</i> | 0.0012 (0.0027)        | 0.0003 (0.0024)         | 0.0007 (0.0017)           | -0.0000 (0.0019)           |
| 20p | 62       | 0.0019 (0.0069)        | <i>0.0085 (0.0035)</i>  | -0.0023 (0.0073)       | -0.0053 (0.0038)        | 0.0016 (0.0040)           | 0.0018 (0.0046)            |
| 20q | 210      | 0.0030 (0.0043)        | -0.0009 (0.0026)        | 0.0014 (0.0028)        | -0.0027 (0.0026)        | -0.0031 (0.0028)          | -0.0034 (0.0031)           |
| 21q | 244      | -0.0035 (0.0032)       | 0.0016 (0.0020)         | -0.0041 (0.0031)       | <i>0.0038 (0.0019)</i>  | 0.0020 (0.0019)           | 0.0039 (0.0021)            |
| 22q | 550      | 0.0004 (0.0023)        | -0.0025 (0.0014)        | -0.0005 (0.0024)       | 0.0007 (0.0017)         | 0.0004 (0.0012)           | -0.0005 (0.0011)           |
| Any | 11638    | 0.0009 (0.0008)        | -0.0005 (0.0005)        | -0.0007 (0.0006)       | <i>-0.0013 (0.0005)</i> | 0.0001 (0.0004)           | 0.0007 (0.0004)            |

This table is the analog of Supplementary Table 15 for polygenic scores computed for six highly heritable, polygenic non-blood-cell traits [47]. These traits serve as controls, as variants influencing these traits are not typically expected to affect cell proliferation. Units are standard deviations. Mean changes in polygenic scores reaching nominal significance ( $P < 0.05$  before multiple hypothesis correction) are indicated in italics; no changes were significant after Bonferroni correction.

**Supplementary Table 17. Action of CN-LOH events on risk alleles for myeloproliferative neoplasms.**

| Locus    | Gene           | Position <sup>a</sup> | Variant     | Alleles <sup>b</sup> | RAF <sup>c</sup> | GWAS                        |                                | Allelic shift in hets        |                      |                       |
|----------|----------------|-----------------------|-------------|----------------------|------------------|-----------------------------|--------------------------------|------------------------------|----------------------|-----------------------|
|          |                |                       |             |                      |                  | $P_{\text{MPN}}^{\text{d}}$ | $P_{\text{CN-LOH}}^{\text{e}}$ | $N_{\text{risk}}^{\text{f}}$ | $N_{\text{nonrisk}}$ | $P$                   |
| 2p21     | <i>PRKCE</i>   | 45956545              | rs12616536  | A/G                  | 0.0042           | $5.5 \times 10^{-7}$        | 0.59                           | 0                            | 0                    | 1                     |
| 2q34     | <i>CPS1</i>    | 211478366             | rs13415932  | A/C                  | 0.9604           | $6.1 \times 10^{-7}$        | 0.56                           | 9                            | 5                    | 0.42                  |
| 3q13.33  | <i>STXBP5L</i> | 120972200             | rs75405916  | C/T                  | 0.0004           | $7.4 \times 10^{-7}$        | 1                              | 1                            | 0                    | 1                     |
| 3q21.3   | <i>GATA2</i>   | 128316939             | rs9864772   | G/A                  | 0.6050           | $2 \times 10^{-7}$          | 0.36                           | 18                           | 19                   | 1                     |
| 3q25.33  | <i>SCHIP1</i>  | 159633461             | rs77249081  | G/C                  | 0.0075           | $1.6 \times 10^{-7}$        | 1                              | 0                            | 0                    | 1                     |
| 3q25.33  | <i>KPNA4</i>   | 160284736             | rs74676712  | T/C                  | 0.1062           | $3.3 \times 10^{-9}$        | 1                              | 20                           | 11                   | 0.15                  |
| 3q26.2   | <i>MECOM</i>   | 168846701             | rs12491785  | C/T                  | 0.3938           | $4.5 \times 10^{-9}$        | 0.96                           | 46                           | 35                   | 0.27                  |
| 4q24     | <i>TET2</i>    | 105749895             | rs1548483   | T/C                  | 0.0391           | $4 \times 10^{-21}$         | 1                              | 14                           | 2                    | 0.0042                |
| 5p15.33  | <i>SLC12A7</i> | 1100831               | rs60833263  | G/A                  | 0.4538           | $1.1 \times 10^{-6}$        | 0.3                            | 18                           | 9                    | 0.12                  |
| 5p15.33  | <i>SLC12A7</i> | 1138335               | rs4131149   | G/T                  | 0.4279           | $3 \times 10^{-7}$          | 0.13                           | 20                           | 11                   | 0.15                  |
| 5p15.33  | <i>TERT</i>    | 1285974               | rs7705526   | A/C                  | 0.3376           | $1.9 \times 10^{-48}$       | 0.3                            | 10                           | 10                   | 1                     |
| 5p15.33  | <i>TERT</i>    | 1287194               | rs2853677   | G/A                  | 0.4227           | $8.4 \times 10^{-39}$       | 0.58                           | 15                           | 11                   | 0.56                  |
| 5q22.1   | <i>NREP</i>    | 111061883             | rs56084922  | A/G                  | 0.9271           | $9.6 \times 10^{-7}$        | 0.78                           | 4                            | 7                    | 0.55                  |
| 6p21.32  | <i>TAP2</i>    | 32668411              | rs9275373   | A/G                  | 0.1110           | $3.8 \times 10^{-7}$        | 0.52                           | 14                           | 14                   | 1                     |
| 6p21.31  | <i>NUDT3</i>   | 34235378              | rs116466979 | C/T                  | 0.0453           | $3.3 \times 10^{-9}$        | 0.63                           | 5                            | 4                    | 1                     |
| 7p22.3   | <i>MAD1L1</i>  | 2112506               | rs1860826   | A/G                  | 0.3545           | $3.9 \times 10^{-7}$        | 0.85                           | 24                           | 19                   | 0.54                  |
| 7q32.3   | <i>MKLN1</i>   | 130746955             | rs62471615  | C/A                  | 0.2953           | $6.1 \times 10^{-16}$       | 0.3                            | 34                           | 29                   | 0.61                  |
| 9p24.1   | <i>JAK2</i>    | 4998401               | rs7868130   | T/C                  | 0.2695           | $9 \times 10^{-115}$        | $4.5 \times 10^{-26}$          | 167                          | 33                   | $9.3 \times 10^{-23}$ |
| 9p24.1   | <i>INSL6</i>   | 5149250               | rs75035022  | T/C                  | 0.0311           | $2.7 \times 10^{-24}$       | 0.017                          | 20                           | 6                    | 0.0094                |
| 9q34.13  | <i>GFI1B</i>   | 135870130             | rs621940    | G/C                  | 0.1572           | $4.1 \times 10^{-9}$        | 0.29                           | 61                           | 68                   | 0.6                   |
| 11q22.3  | <i>ATM</i>     | 108143456             | rs1800057   | G/C                  | 0.0262           | $2.6 \times 10^{-9}$        | 0.29                           | 25                           | 2                    | $5.6 \times 10^{-6}$  |
| 12q24.12 | <i>SH2B3</i>   | 111865049             | rs7310615   | C/G                  | 0.4850           | $2.1 \times 10^{-20}$       | 0.079                          | 85                           | 35                   | $5.7 \times 10^{-6}$  |
| 13q14.11 | <i>FOXO1</i>   | 41204015              | rs7323267   | C/T                  | 0.2031           | $1.1 \times 10^{-7}$        | 0.25                           | 78                           | 74                   | 0.81                  |
| 13q31.1  | <i>SPRY2</i>   | 82102166              | rs9545761   | T/C                  | 0.3977           | $7.3 \times 10^{-7}$        | 0.19                           | 132                          | 121                  | 0.53                  |
| 14q12    | <i>FOXG1</i>   | 28341915              | rs144202762 | A/T                  | 0.0060           | $5.6 \times 10^{-7}$        | 0.92                           | 0                            | 0                    | 1                     |
| 20q13.33 | <i>PRPF6</i>   | 62651978              | rs816925    | G/A                  | 0.5644           | $7.8 \times 10^{-7}$        | 0.44                           | 63                           | 44                   | 0.081                 |
| 21q22.12 | <i>RUNX1</i>   | 36347627              | rs55857134  | C/T                  | 0.3339           | $1 \times 10^{-8}$          | 0.18                           | 42                           | 37                   | 0.65                  |
| 22q12.1  | <i>CHEK2</i>   | 29121087              | rs17879961  | G/A                  | 0.0174           | $9.1 \times 10^{-7}$        | 1                              | 0                            | 0                    | 1                     |

Risk alleles for myeloproliferative neoplasms (identified by Bao et al. [66]) tended to be made homozygous by CN-LOH events in UK Biobank. The first seven columns of this table are from Supplementary Table 2 of ref. [66] (which provided data for independent variants reaching  $P < 1 \times 10^{-6}$ ); the last four columns show, for each MPN risk allele, its  $P$ -value for association with CN-LOH events in *cis*, and the directionality of CN-LOH events in heterozygous carriers of the risk allele. For details of statistical tests and sample sizes, see Supplementary Table 7.

<sup>a</sup>Base pair position in hg19 coordinates.

<sup>b</sup>Risk/nonrisk allele for myeloproliferative neoplasms [66].

<sup>c</sup>Risk allele frequency.

<sup>d</sup> $P$ -value for association with myeloproliferative neoplasms [66].

<sup>e</sup> $P$ -value for association with likely-CN-LOH events in *cis* in UK Biobank.

<sup>f</sup>Number of mosaic individuals heterozygous for the variant in which the somatic event shifted the allelic balance in favor of the risk allele (by duplication of its chromosomal segment and loss of the homologous segment).

**Supplementary Table 18. Accuracy of predicting CN-LOH directionality using genetic risk.**

| Arm | N   | CN-LOH-associated alleles only |                     |                       | Polygenic scores (for blood traits) |                       |                       | Both              |                      |                       |
|-----|-----|--------------------------------|---------------------|-----------------------|-------------------------------------|-----------------------|-----------------------|-------------------|----------------------|-----------------------|
|     |     | Pred. acc. (s.e.)              | Pred. R (95% CI)    | P                     | Pred. acc. (s.e.)                   | Pred. R (95% CI)      | P                     | Pred. acc. (s.e.) | Pred. R (95% CI)     | P                     |
| 1p  | 927 | 0.639 (0.007)                  | 0.523 (0.474,0.568) | $2 \times 10^{-66}$   | 0.590 (0.016)                       | 0.338 (0.279,0.394)   | $1.8 \times 10^{-26}$ | 0.636 (0.010)     | 0.518 (0.470,0.564)  | $3.7 \times 10^{-65}$ |
| 1q  | 694 | 0.505 (0.002)                  | 0.080 (0.006,0.154) | 0.017                 | 0.535 (0.018)                       | 0.023 (-0.051,0.097)  | 0.27                  | 0.550 (0.017)     | 0.088 (0.013,0.161)  | 0.01                  |
| 2p  | 169 | –                              | –                   | –                     | 0.556 (0.034)                       | 0.123 (-0.028,0.269)  | 0.055                 | 0.556 (0.034)     | 0.123 (-0.028,0.269) | 0.055                 |
| 2q  | 205 | –                              | –                   | –                     | 0.605 (0.034)                       | 0.227 (0.093,0.353)   | 0.00053               | 0.605 (0.034)     | 0.227 (0.093,0.353)  | 0.00053               |
| 3p  | 164 | –                              | –                   | –                     | 0.497 (0.033)                       | 0.002 (-0.151,0.155)  | 0.49                  | 0.497 (0.033)     | 0.002 (-0.151,0.155) | 0.49                  |
| 5p  | 71  | –                              | –                   | –                     | 0.704 (0.055)                       | 0.417 (0.203,0.592)   | 0.00015               | 0.704 (0.055)     | 0.417 (0.203,0.592)  | 0.00015               |
| 5q  | 162 | –                              | –                   | –                     | 0.574 (0.039)                       | 0.178 (0.025,0.324)   | 0.012                 | 0.574 (0.039)     | 0.178 (0.025,0.324)  | 0.012                 |
| 8q  | 134 | 0.526 (0.010)                  | 0.229 (0.061,0.383) | 0.0039                | –                                   | –                     | –                     | 0.526 (0.010)     | 0.229 (0.061,0.383)  | 0.0039                |
| 9p  | 386 | 0.680 (0.016)                  | 0.501 (0.422,0.572) | $3.6 \times 10^{-26}$ | 0.674 (0.016)                       | 0.472 (0.391,0.546)   | $3.8 \times 10^{-23}$ | 0.680 (0.016)     | 0.501 (0.422,0.572)  | $3.6 \times 10^{-26}$ |
| 11q | 647 | 0.543 (0.006)                  | 0.294 (0.222,0.363) | $1.1 \times 10^{-14}$ | 0.577 (0.019)                       | 0.200 (0.125,0.273)   | $1.4 \times 10^{-7}$  | 0.614 (0.019)     | 0.352 (0.283,0.418)  | $1.3 \times 10^{-20}$ |
| 12q | 302 | 0.523 (0.006)                  | 0.216 (0.105,0.321) | $7.9 \times 10^{-5}$  | 0.603 (0.028)                       | 0.269 (0.161,0.371)   | $1 \times 10^{-6}$    | 0.608 (0.018)     | 0.338 (0.235,0.435)  | $7.9 \times 10^{-10}$ |
| 14q | 956 | 0.569 (0.012)                  | 0.194 (0.133,0.255) | $6.8 \times 10^{-10}$ | 0.544 (0.016)                       | 0.155 (0.092,0.216)   | $7.7 \times 10^{-7}$  | 0.559 (0.014)     | 0.171 (0.109,0.232)  | $4.8 \times 10^{-8}$  |
| 15q | 638 | 0.612 (0.009)                  | 0.460 (0.397,0.519) | $4.3 \times 10^{-35}$ | 0.494 (0.011)                       | -0.045 (-0.123,0.032) | 0.87                  | 0.601 (0.010)     | 0.453 (0.389,0.513)  | $6.3 \times 10^{-34}$ |
| 18q | 127 | –                              | –                   | –                     | 0.535 (0.044)                       | 0.170 (-0.005,0.334)  | 0.028                 | 0.535 (0.044)     | 0.170 (-0.005,0.334) | 0.028                 |

This table provides numerical data plotted in Fig. 2c. CN-LOH directions were predicted using: (i) only CN-LOH-associated alleles on affected chromosomal segments (for chromosome arms containing at least one association; Extended Data Table 1); (ii) polygenic score differentials on affected chromosomal segments; (iii) both CN-LOH-associated alleles and polygenic scores.

For each chromosome arm with at least one available predictor (Methods), prediction accuracy was computed as the fraction of predicted CN-LOH directions (hard-called) that matched observed CN-LOH directions. Prediction *R* was computed as the correlation between predicted CN-LOH directions (continuous-valued, as output by the linear predictor) and observed CN-LOH directions. Predictive performance was assessed using 10-fold cross-validation, and both accuracy and *R* metrics (and standard errors and 95% CIs) were computed over a merge of all held-out folds. *P*-values for Pearson correlation  $R > 0$  were computed using a one-sided *t*-test (on transformed correlations).



**Supplementary Table 19. Logistic models used for predicting directionality of clonally expanded CN-LOH mutations.**

| Arm | Logistic regression model                                                                                                                                            |
|-----|----------------------------------------------------------------------------------------------------------------------------------------------------------------------|
| 1p  | $5.9 \times (\text{CN-LOH allele count})$                                                                                                                            |
| 1q  | $1.9 \times (\text{CN-LOH allele count}) + 2.8 \times (\text{platelet crit PRS})$                                                                                    |
| 2p  | $4.8 \times (\text{eosinophil\# PRS}) - 11.9 \times (\text{monocyte\% PRS})$                                                                                         |
| 2q  | $7.5 \times (\text{hemoglobin PRS}) + 7.9 \times (\text{platelet crit PRS})$                                                                                         |
| 3p  | $5.8 \times (\text{neutrophil\# PRS})$                                                                                                                               |
| 5p  | $47.6 \times (\text{monocyte\# PRS})$                                                                                                                                |
| 5q  | $10.0 \times (\text{platelet crit PRS})$                                                                                                                             |
| 8q  | $102.6 \times (\text{CN-LOH allele count})$                                                                                                                          |
| 9p  | $1.8 \times (\text{CN-LOH allele count})$                                                                                                                            |
| 11q | $104.7 \times (\text{CN-LOH allele count}) + 1.7 \times (\text{MPN PRS}) + 36.4 \times (\text{mLOY PRS})$<br>$+ 4.2 \times (\text{platelet distribution width PRS})$ |
| 12q | $123.7 \times (\text{CN-LOH allele count}) + 3.7 \times (\text{MPN PRS})$                                                                                            |
| 14q | $0.5 \times (\text{CN-LOH allele count})$                                                                                                                            |
| 15q | $3.5 \times (\text{CN-LOH allele count})$                                                                                                                            |
| 18q | $24.0 \times (\text{mLOY PRS})$                                                                                                                                      |

We ran logistic regression independently on each chromosome arm (using stepwise forward selection for variable selection) to enable the logistic model to pick up PRS signals concentrated on specific arms that might wash out genome-wide. To guard against overfitting, we ran logistic regression within 10-fold cross-validation; above we report median coefficients for logistic models across the 10 cross-validation folds (for each of 14 arms for which stepwise forward selection found at least one predictor (on average across folds). All chromosome arms either contained at most one CN-LOH-associated locus or contained two loci with similar effects (large-effect *MRE11* and *ATM* alleles on 11q; small-effect *TCL1A* and *DLK1* alleles on 14q), so we aggregated the effects of all CN-LOH-associated alleles on an arm into a single “CN-LOH allele count” variable in the logistic regression models. For each locus, the effect allele in these models was the allele that tends to be made homozygous by CN-LOH events (which differs from the risk allele for *MPL* and *DLK1*).

## Supplementary Table 20. Risk increase for incident cancers conferred by mCAs.

### (a) Analyses restricted to individuals with normal blood counts at assessment

| mCA  | CLL<br>$N_{\text{case}}=107, N_{\text{control}}=361,850$ |                  | MPN<br>$N_{\text{case}}=67, N_{\text{control}}=358,820$ |                  | MDS<br>$N_{\text{case}}=56, N_{\text{control}}=358,807$ |                  | Any blood cancer<br>$N_{\text{case}}=1,055, N_{\text{control}}=346,965$ |                  |
|------|----------------------------------------------------------|------------------|---------------------------------------------------------|------------------|---------------------------------------------------------|------------------|-------------------------------------------------------------------------|------------------|
|      | P                                                        | OR (95% CI)      | P                                                       | OR (95% CI)      | P                                                       | OR (95% CI)      | P                                                                       | OR (95% CI)      |
| 1+   | 1                                                        | 0 (0-280)        | 1                                                       | 0 (0-568)        | 1                                                       | 0 (0-606)        | 0.0073                                                                  | 16.8 (1.93-66.6) |
| 1p-  | 1                                                        | 0 (0-1.1e+03)    | 1                                                       | 0 (0-1.62e+03)   | 1                                                       | 0 (0-1.74e+03)   | 0.037                                                                   | 30 (0.67-224)    |
| 1q-  | 1                                                        | 0 (0-621)        | 1                                                       | 0 (0-1.28e+03)   | 1                                                       | 0 (0-1.27e+03)   | 1                                                                       | 0 (0-70.3)       |
| 1p=  | 1                                                        | 0 (0-25.7)       | 0.084                                                   | 11.6 (0.29-67.6) | 1                                                       | 0 (0-48.6)       | 0.17                                                                    | 2.15 (0.44-6.35) |
| 1q=  | 1                                                        | 0 (0-32.3)       | 1                                                       | 0 (0-53.1)       | 1                                                       | 0 (0-59.9)       | 0.32                                                                    | 1.76 (0.21-6.44) |
| 2p-  | 1                                                        | 0 (0-164)        | 1                                                       | 0 (0-236)        | 1                                                       | 0 (0-261)        | 1                                                                       | 0 (0-16.1)       |
| 2q-  | 1                                                        | 0 (0-478)        | 1                                                       | 0 (0-740)        | 1                                                       | 0 (0-736)        | 1                                                                       | 0 (0-46)         |
| 2p=  | 1                                                        | 0 (0-158)        | 1                                                       | 0 (0-280)        | 1                                                       | 0 (0-304)        | 1                                                                       | 0 (0-16.6)       |
| 2q=  | 1                                                        | 0 (0-123)        | 1                                                       | 0 (0-217)        | 1                                                       | 0 (0-246)        | 1                                                                       | 0 (0-12.6)       |
| 3+   | 0.00029                                                  | 85.8 (9.96-337)  | 1                                                       | 0 (0-249)        | 1                                                       | 0 (0-245)        | 0.00013                                                                 | 17.1 (4.47-46.9) |
| 3p-  | 1                                                        | 0 (0-681)        | 1                                                       | 0 (0-1.41e+03)   | 1                                                       | 0 (0-1.4e+03)    | 1                                                                       | 0 (0-73.4)       |
| 3p=  | 1                                                        | 0 (0-118)        | 1                                                       | 0 (0-202)        | 1                                                       | 0 (0-215)        | 1                                                                       | 0 (0-12.2)       |
| 3q=  | 1                                                        | 0 (0-167)        | 1                                                       | 0 (0-294)        | 1                                                       | 0 (0-307)        | 0.21                                                                    | 4.32 (0.11-25.2) |
| 4q-  | 1                                                        | 0 (0-125)        | 1                                                       | 0 (0-224)        | 0.018                                                   | 58.5 (1.42-355)  | 0.032                                                                   | 7.42 (0.88-28.1) |
| 4p=  | 1                                                        | 0 (0-453)        | 1                                                       | 0 (0-622)        | 1                                                       | 0 (0-829)        | 0.088                                                                   | 11.3 (0.27-70.3) |
| 4q=  | 1                                                        | 0 (0-88.2)       | 1                                                       | 0 (0-158)        | 0.00035                                                 | 79.2 (9.14-312)  | 0.0011                                                                  | 9.4 (2.5-25)     |
| 5+   | 1                                                        | 0 (0-205)        | 1                                                       | 0 (0-336)        | 1                                                       | 0 (0-358)        | 0.16                                                                    | 5.86 (0.14-34.7) |
| 5q-  | 1                                                        | 0 (0-134)        | 1                                                       | 0 (0-265)        | 0.013                                                   | 77.4 (1.87-480)  | 0.003                                                                   | 11 (2.21-33.6)   |
| 5q=  | 1                                                        | 0 (0-155)        | 1                                                       | 0 (0-261)        | 1                                                       | 0 (0-293)        | 1                                                                       | 0 (0-16.1)       |
| 6+   | 1                                                        | 0 (0-1.1e+03)    | 1                                                       | 0 (0-1.41e+03)   | 1                                                       | 0 (0-1.96e+03)   | 1                                                                       | 0 (0-111)        |
| 6q-  | 1                                                        | 0 (0-367)        | 1                                                       | 0 (0-570)        | 1                                                       | 0 (0-589)        | 0.1                                                                     | 9.56 (0.23-58.7) |
| 6p=  | 1                                                        | 0 (0-74.8)       | 1                                                       | 0 (0-118)        | 1                                                       | 0 (0-134)        | 0.094                                                                   | 3.96 (0.47-14.7) |
| 6q=  | 1                                                        | 0 (0-227)        | 1                                                       | 0 (0-377)        | 1                                                       | 0 (0-400)        | 1                                                                       | 0 (0-23.5)       |
| 7p-  | 1                                                        | 0 (0-546)        | 1                                                       | 0 (0-1.23e+03)   | 1                                                       | 0 (0-1.41e+03)   | 1                                                                       | 0 (0-57)         |
| 7q-  | 1                                                        | 0 (0-190)        | 1                                                       | 0 (0-298)        | 1                                                       | 0 (0-298)        | 0.019                                                                   | 9.77 (1.15-37.5) |
| 7p=  | 1                                                        | 0 (0-237)        | 1                                                       | 0 (0-369)        | 1                                                       | 0 (0-373)        | 1                                                                       | 0 (0-23.3)       |
| 7q=  | 1                                                        | 0 (0-170)        | 0.013                                                   | 81.3 (1.99-497)  | $3.1 \times 10^{-7}$                                    | 267 (51-910)     | $9.8 \times 10^{-5}$                                                    | 18.2 (4.76-49.9) |
| 8+   | 0.023                                                    | 44.4 (1.09-263)  | 1                                                       | 0 (0-322)        | 0.011                                                   | 93.2 (2.25-588)  | $2.3 \times 10^{-6}$                                                    | 26.7 (8.24-67)   |
| 8p-  | 0.0072                                                   | 147 (3.49-979)   | 1                                                       | 0 (0-808)        | 1                                                       | 0 (0-1.06e+03)   | 0.066                                                                   | 15.4 (0.37-98)   |
| 8p=  | 1                                                        | 0 (0-566)        | 1                                                       | 0 (0-1.16e+03)   | 1                                                       | 0 (0-1.41e+03)   | 1                                                                       | 0 (0-54.4)       |
| 8q=  | 1                                                        | 0 (0-175)        | 1                                                       | 0 (0-283)        | 1                                                       | 0 (0-311)        | 1                                                                       | 0 (0-17.9)       |
| 9+   | 0.019                                                    | 54.3 (1.33-329)  | 1                                                       | 0 (0-402)        | 1                                                       | 0 (0-390)        | 0.15                                                                    | 6.3 (0.15-37.8)  |
| 9q-  | 1                                                        | 0 (0-561)        | 1                                                       | 0 (0-1.08e+03)   | 1                                                       | 0 (0-1.17e+03)   | 1                                                                       | 0 (0-71)         |
| 9p=  | 1                                                        | 0 (0-57.8)       | $3.6 \times 10^{-13}$                                   | 260 (89.4-631)   | 1                                                       | 0 (0-158)        | $8.2 \times 10^{-6}$                                                    | 13.8 (4.91-31.1) |
| 9q=  | 1                                                        | 0 (0-46.8)       | 1                                                       | 0 (0-83.7)       | 1                                                       | 0 (0-85.1)       | 1                                                                       | 0 (0-4.81)       |
| 10q- | 1                                                        | 0 (0-75.2)       | 1                                                       | 0 (0-122)        | 1                                                       | 0 (0-162)        | 1                                                                       | 0 (0-7.28)       |
| 10p= | 1                                                        | 0 (0-393)        | 1                                                       | 0 (0-726)        | 1                                                       | 0 (0-822)        | 1                                                                       | 0 (0-39)         |
| 10q= | 1                                                        | 0 (0-199)        | 1                                                       | 0 (0-338)        | 1                                                       | 0 (0-380)        | 1                                                                       | 0 (0-20.1)       |
| 11p- | 1                                                        | 0 (0-394)        | 1                                                       | 0 (0-698)        | 1                                                       | 0 (0-687)        | 1                                                                       | 0 (0-48)         |
| 11q- | 0.045                                                    | 22.1 (0.55-130)  | 1                                                       | 0 (0-147)        | 1                                                       | 0 (0-144)        | $9.2 \times 10^{-5}$                                                    | 11.9 (3.75-28.8) |
| 11p= | 1                                                        | 0 (0-32.4)       | 1                                                       | 0 (0-53.3)       | 1                                                       | 0 (0-60.9)       | 0.63                                                                    | 0 (0-3.32)       |
| 11q= | 0.092                                                    | 10.6 (0.26-60.9) | 0.056                                                   | 17.7 (0.44-104)  | 0.055                                                   | 17.9 (0.44-106)  | 0.0004                                                                  | 6.6 (2.39-14.7)  |
| 12+  | $5.1 \times 10^{-22}$                                    | 149 (72.9-278)   | 0.059                                                   | 16.8 (0.41-98.6) | 0.061                                                   | 16.2 (0.4-95.7)  | $2.9 \times 10^{-20}$                                                   | 23.3 (13.9-37.3) |
| 12p- | 1                                                        | 0 (0-788)        | 1                                                       | 0 (0-1.71e+03)   | 1                                                       | 0 (0-1.89e+03)   | 1                                                                       | 0 (0-89.4)       |
| 12q- | 1                                                        | 0 (0-601)        | 1                                                       | 0 (0-821)        | 1                                                       | 0 (0-913)        | 1                                                                       | 0 (0-56.5)       |
| 12p= | 1                                                        | 0 (0-455)        | 1                                                       | 0 (0-793)        | 1                                                       | 0 (0-938)        | 1                                                                       | 0 (0-47.5)       |
| 12q= | 1                                                        | 0 (0-80.2)       | 1                                                       | 0 (0-141)        | 1                                                       | 0 (0-161)        | 1                                                                       | 0 (0-8.3)        |
| 13q- | $5.1 \times 10^{-13}$                                    | 127 (48.3-280)   | 1                                                       | 0 (0-77.3)       | 1                                                       | 0 (0-73.6)       | $1.8 \times 10^{-7}$                                                    | 14.4 (6.08-29.5) |
| 13q= | $8.2 \times 10^{-5}$                                     | 38.4 (7.7-117)   | 1                                                       | 0 (0-68.6)       | 1                                                       | 0 (0-72.2)       | 0.047                                                                   | 3.81 (0.78-11.4) |
| 14+  | 1                                                        | 0 (0-73.1)       | 1                                                       | 0 (0-135)        | 0.033                                                   | 30.7 (0.75-184)  | 0.39                                                                    | 2.07 (0.05-11.9) |
| 14q- | 0.00017                                                  | 115 (13.2-456)   | 1                                                       | 0 (0-294)        | 1                                                       | 0 (0-280)        | 0.00074                                                                 | 18.5 (3.63-59.2) |
| 14q= | 1                                                        | 0 (0-23.5)       | 1                                                       | 0 (0-40)         | 1                                                       | 0 (0-42.9)       | 1                                                                       | 0.65 (0.02-3.64) |
| 15+  | 1                                                        | 0 (0-46.8)       | 1                                                       | 0 (0-93)         | 1                                                       | 0 (0-71.5)       | 0.55                                                                    | 1.27 (0.03-7.22) |
| 15q- | 1                                                        | 0 (0-943)        | 1                                                       | 0 (0-1.59e+03)   | 1                                                       | 0 (0-1.71e+03)   | 1                                                                       | 0 (0-106)        |
| 15q= | 1                                                        | 0 (0-37.1)       | 1                                                       | 0 (0-66.2)       | 1                                                       | 0 (0-71.8)       | 0.62                                                                    | 1.03 (0.03-5.83) |
| 16p- | 1                                                        | 0 (0-142)        | 1                                                       | 0 (0-259)        | 1                                                       | 0 (0-303)        | 1                                                                       | 0 (0-13.9)       |
| 16q- | 1                                                        | 0 (0-438)        | 1                                                       | 0 (0-850)        | 1                                                       | 0 (0-942)        | 1                                                                       | 0 (0-50.8)       |
| 16p= | 1                                                        | 0 (0-63.9)       | 1                                                       | 0 (0-110)        | 1                                                       | 0 (0-116)        | 0.11                                                                    | 3.52 (0.42-13)   |
| 16q= | 1                                                        | 0 (0-80.4)       | 0.029                                                   | 35 (0.86-207)    | 1                                                       | 0 (0-144)        | 0.38                                                                    | 2.13 (0.05-12.2) |
| 17p- | 1                                                        | 0 (0-125)        | 1                                                       | 0 (0-172)        | 1                                                       | 0 (0-168)        | 0.27                                                                    | 3.16 (0.08-18.3) |
| 17q- | 1                                                        | 0 (0-288)        | 1                                                       | 0 (0-544)        | 1                                                       | 0 (0-537)        | 0.13                                                                    | 7.51 (0.18-45.4) |
| 17p= | 1                                                        | 0 (0-197)        | 1                                                       | 0 (0-348)        | 1                                                       | 0 (0-347)        | 1                                                                       | 0 (0-20.2)       |
| 17q= | 1                                                        | 0 (0-52.6)       | 1                                                       | 0 (0-90.3)       | 1                                                       | 0 (0-101)        | 0.51                                                                    | 1.42 (0.04-8.04) |
| 18+  | $6.7 \times 10^{-6}$                                     | 91 (18-288)      | 1                                                       | 0 (0-186)        | 1                                                       | 0 (0-181)        | $2.9 \times 10^{-5}$                                                    | 15.3 (4.8-37.6)  |
| 18p- | 1                                                        | 0 (0-665)        | 1                                                       | 0 (0-1.41e+03)   | 1                                                       | 0 (0-1.28e+03)   | 1                                                                       | 0 (0-77.6)       |
| 18q= | 1                                                        | 0 (0-233)        | 1                                                       | 0 (0-454)        | 1                                                       | 0 (0-493)        | 1                                                                       | 0 (0-25.3)       |
| 19+  | 1                                                        | 0 (0-687)        | 1                                                       | 0 (0-982)        | 1                                                       | 0 (0-1.26e+03)   | 1                                                                       | 0 (0-72.9)       |
| 19p= | 1                                                        | 0 (0-116)        | 1                                                       | 0 (0-209)        | 0.018                                                   | 58 (1.41-351)    | 0.28                                                                    | 3.13 (0.08-18.1) |
| 19q= | 1                                                        | 0 (0-93)         | 0.023                                                   | 45.1 (1.11-265)  | 0.02                                                    | 51.1 (1.25-308)  | 0.058                                                                   | 5.28 (0.63-19.7) |
| 20q- | 1                                                        | 0 (0-35.2)       | 1                                                       | 0 (0-61.1)       | 0.064                                                   | 15.5 (0.38-91.8) | 0.021                                                                   | 3.94 (1.06-10.3) |
| 20p= | 1                                                        | 0 (0-503)        | 1                                                       | 0 (0-796)        | 1                                                       | 0 (0-953)        | 1                                                                       | 0 (0-48.4)       |
| 20q= | 1                                                        | 0 (0-104)        | 1                                                       | 0 (0-165)        | 1                                                       | 0 (0-192)        | 0.31                                                                    | 2.78 (0.07-15.9) |
| 21+  | 1                                                        | 0 (0-100)        | 1                                                       | 0 (0-170)        | 0.023                                                   | 43.8 (1.07-263)  | 0.31                                                                    | 2.75 (0.07-15.8) |
| 21q- | 1                                                        | 0 (0-808)        | 1                                                       | 0 (0-1.55e+03)   | 1                                                       | 0 (0-1.73e+03)   | 0.048                                                                   | 22.3 (0.51-154)  |
| 21q= | 1                                                        | 0 (0-127)        | 1                                                       | 0 (0-210)        | 1                                                       | 0 (0-223)        | 0.26                                                                    | 3.32 (0.08-19.2) |
| 22+  | 1                                                        | 0 (0-88.3)       | 1                                                       | 0 (0-142)        | 1                                                       | 0 (0-139)        | 0.073                                                                   | 4.61 (0.55-17.2) |
| 22q- | 1                                                        | 0 (0-256)        | 1                                                       | 0 (0-305)        | 1                                                       | 0 (0-296)        | 0.13                                                                    | 7.19 (0.18-43.4) |
| 22q= | 1                                                        | 0 (0-48.9)       | 1                                                       | 0 (0-81.5)       | 1                                                       | 0 (0-82.8)       | 0.54                                                                    | 1.29 (0.03-7.28) |

This table provides numerical data plotted in Fig. 3a. Events were grouped by chromosome and copy number, with loss and CN-LOH events subdivided by p-arm vs. q-arm; events observed in  $\geq 30$  individuals were tested for association with incident blood cancers (diagnosed  $>1$  year after DNA collection in individuals with no previous cancer) using a two-sided CMH test.

(b) Analyses with no restrictions on blood counts at assessment

| mCA  | CLL<br>$N_{\text{case}}=199, N_{\text{control}}=375,954$<br>OR (95% CI) |                  | MPN<br>$N_{\text{case}}=138, N_{\text{control}}=375,893$<br>OR (95% CI) |                  | MDS<br>$N_{\text{case}}=70, N_{\text{control}}=375,818$<br>OR (95% CI) |                  | Any blood cancer<br>$N_{\text{case}}=1,383, N_{\text{control}}=377,192$<br>OR (95% CI) |                  |
|------|-------------------------------------------------------------------------|------------------|-------------------------------------------------------------------------|------------------|------------------------------------------------------------------------|------------------|----------------------------------------------------------------------------------------|------------------|
|      | P                                                                       |                  | P                                                                       |                  | P                                                                      |                  | P                                                                                      |                  |
| 1+   | 1                                                                       | 0 (0-151)        | 1                                                                       | 0 (0-250)        | 0.0091                                                                 | 116 (2.76-760)   | 0.00081                                                                                | 18 (3.52-57.8)   |
| 1p-  | 1                                                                       | 0 (0-441)        | 1                                                                       | 0 (0-666)        | 1                                                                      | 0 (0-989)        | 0.0027                                                                                 | 29.6 (3.21-132)  |
| 1q-  | 1                                                                       | 0 (0-327)        | 1                                                                       | 0 (0-597)        | 1                                                                      | 0 (0-921)        | 0.092                                                                                  | 11 (0.26-71.5)   |
| 1p=  | 0.24                                                                    | 3.59 (0.09-20.4) | 0.00087                                                                 | 16.9 (3.41-50.8) | 0.098                                                                  | 9.89 (0.25-57.5) | 0.00079                                                                                | 4.27 (1.83-8.53) |
| 1q=  | 1                                                                       | 0 (0-17.1)       | 1                                                                       | 0 (0-25.6)       | 1                                                                      | 0 (0-47.8)       | 0.66                                                                                   | 1.35 (0.16-4.91) |
| 2p-  | 0.053                                                                   | 18.8 (0.47-110)  | 1                                                                       | 0 (0-117)        | 1                                                                      | 0 (0-204)        | 0.31                                                                                   | 2.76 (0.07-15.9) |
| 2q-  | 1                                                                       | 0 (0-220)        | 1                                                                       | 0 (0-365)        | 1                                                                      | 0 (0-556)        | 1                                                                                      | 0 (0-30.5)       |
| 2p=  | 1                                                                       | 0 (0-80.9)       | 1                                                                       | 0 (0-126)        | 1                                                                      | 0 (0-225)        | 1                                                                                      | 0 (0-11.8)       |
| 2q=  | 1                                                                       | 0 (0-65.8)       | 1                                                                       | 0 (0-98.4)       | 1                                                                      | 0 (0-194)        | 1                                                                                      | 0 (0-9.35)       |
| 3+   | $1.9 \times 10^{-5}$                                                    | 63.6 (12.6-200)  | 1                                                                       | 0 (0-127)        | 1                                                                      | 0 (0-196)        | $1.1 \times 10^{-7}$                                                                   | 20.9 (8.02-45.9) |
| 3p-  | 1                                                                       | 0 (0-377)        | 1                                                                       | 0 (0-614)        | 1                                                                      | 0 (0-940)        | 1                                                                                      | 0 (0-53.6)       |
| 3p=  | 1                                                                       | 0 (0-63.7)       | 1                                                                       | 0 (0-99.4)       | 1                                                                      | 0 (0-180)        | 1                                                                                      | 0 (0-9.61)       |
| 3q=  | 1                                                                       | 0 (0-89.6)       | 1                                                                       | 0 (0-141)        | 1                                                                      | 0 (0-247)        | 0.26                                                                                   | 3.4 (0.08-19.8)  |
| 4q-  | 0.059                                                                   | 16.8 (0.42-98.2) | 1                                                                       | 0 (0-105)        | 0.026                                                                  | 39.2 (0.96-235)  | 0.0086                                                                                 | 7.47 (1.5-22.8)  |
| 4p=  | 1                                                                       | 0 (0-239)        | 1                                                                       | 0 (0-295)        | 1                                                                      | 0 (0-618)        | 0.12                                                                                   | 8.01 (0.19-49.1) |
| 4q=  | 1                                                                       | 0 (0-44.8)       | 1                                                                       | 0 (0-77.3)       | $6.2 \times 10^{-6}$                                                   | 94.3 (18.5-299)  | 0.00039                                                                                | 8.62 (2.73-20.9) |
| 5+   | 1                                                                       | 0 (0-93.6)       | 1                                                                       | 0 (0-157)        | 1                                                                      | 0 (0-265)        | 0.24                                                                                   | 3.72 (0.09-21.8) |
| 5q-  | 0.054                                                                   | 18.2 (0.45-107)  | 0.034                                                                   | 29.5 (0.73-172)  | 0.00015                                                                | 122 (14-482)     | $3.1 \times 10^{-6}$                                                                   | 16.5 (5.84-37.6) |
| 5q=  | 1                                                                       | 0 (0-80.3)       | 1                                                                       | 0 (0-118)        | 1                                                                      | 0 (0-213)        | 0.29                                                                                   | 2.96 (0.07-17.1) |
| 6+   | 1                                                                       | 0 (0-514)        | 1                                                                       | 0 (0-670)        | 1                                                                      | 0 (0-1.64e+03)   | 1                                                                                      | 0 (0-71.7)       |
| 6q-  | 1                                                                       | 0 (0-168)        | 1                                                                       | 0 (0-294)        | 1                                                                      | 0 (0-495)        | 0.15                                                                                   | 6.45 (0.16-39)   |
| 6p=  | 1                                                                       | 0 (0-39.3)       | 1                                                                       | 0 (0-57.8)       | 1                                                                      | 0 (0-108)        | 0.15                                                                                   | 2.97 (0.36-11)   |
| 6q=  | 1                                                                       | 0 (0-124)        | 1                                                                       | 0 (0-193)        | 1                                                                      | 0 (0-316)        | 1                                                                                      | 0 (0-18.2)       |
| 7p-  | 1                                                                       | 0 (0-282)        | 1                                                                       | 0 (0-499)        | 1                                                                      | 0 (0-1.28e+03)   | 1                                                                                      | 0 (0-46.8)       |
| 7q-  | 1                                                                       | 0 (0-87.1)       | 1                                                                       | 0 (0-154)        | 1                                                                      | 0 (0-237)        | 0.00028                                                                                | 13.7 (3.6-37.4)  |
| 7p=  | 1                                                                       | 0 (0-124)        | 1                                                                       | 0 (0-195)        | 1                                                                      | 0 (0-313)        | 1                                                                                      | 0 (0-17.9)       |
| 7q=  | 1                                                                       | 0 (0-94.7)       | 0.027                                                                   | 37.8 (0.93-221)  | $6.8 \times 10^{-7}$                                                   | 203 (39-664)     | 0.00027                                                                                | 13.9 (3.66-37.9) |
| 8+   | 0.046                                                                   | 21.7 (0.54-127)  | 1                                                                       | 0 (0-129)        | 0.018                                                                  | 58.9 (1.43-356)  | $1.3 \times 10^{-6}$                                                                   | 19.4 (6.84-45)   |
| 8p-  | 0.016                                                                   | 64.9 (1.56-406)  | 1                                                                       | 0 (0-415)        | 1                                                                      | 0 (0-847)        | 0.1                                                                                    | 9.91 (0.24-61.4) |
| 8p=  | 1                                                                       | 0 (0-297)        | 1                                                                       | 0 (0-473)        | 1                                                                      | 0 (0-1.16e+03)   | 1                                                                                      | 0 (0-42)         |
| 8q=  | 1                                                                       | 0 (0-93)         | 1                                                                       | 0 (0-138)        | 1                                                                      | 0 (0-238)        | 1                                                                                      | 0 (0-13.6)       |
| 9+   | 0.036                                                                   | 27.8 (0.68-166)  | 0.00026                                                                 | 90 (10.5-354)    | 1                                                                      | 0 (0-270)        | 0.0024                                                                                 | 12.1 (2.4-37.8)  |
| 9q-  | 1                                                                       | 0 (0-271)        | 1                                                                       | 0 (0-399)        | 1                                                                      | 0 (0-661)        | 1                                                                                      | 0 (0-37.8)       |
| 9p=  | 1                                                                       | 0 (0-31.3)       | $6.3 \times 10^{-52}$                                                   | 402 (239-671)    | 1                                                                      | 0 (0-85.8)       | $1.9 \times 10^{-29}$                                                                  | 33.5 (21.1-51.2) |
| 9q=  | 1                                                                       | 0 (0-24)         | 1                                                                       | 0 (0-38.8)       | 1                                                                      | 0 (0-66)         | 0.63                                                                                   | 0 (0-3.56)       |
| 10q- | 1                                                                       | 0 (0-38.4)       | 1                                                                       | 0 (0-54.4)       | 1                                                                      | 0 (0-121)        | 1                                                                                      | 0 (0-5.4)        |
| 10p= | 1                                                                       | 0 (0-227)        | 1                                                                       | 0 (0-341)        | 1                                                                      | 0 (0-701)        | 1                                                                                      | 0 (0-32.4)       |
| 10q= | 1                                                                       | 0 (0-110)        | 1                                                                       | 0 (0-161)        | 1                                                                      | 0 (0-312)        | 1                                                                                      | 0 (0-16)         |
| 11p- | 1                                                                       | 0 (0-199)        | 1                                                                       | 0 (0-297)        | 1                                                                      | 0 (0-516)        | 1                                                                                      | 0 (0-30.3)       |
| 11q- | 0.00012                                                                 | 33.8 (6.79-103)  | 1                                                                       | 0 (0-70.4)       | 1                                                                      | 0 (0-112)        | $2.3 \times 10^{-8}$                                                                   | 15.1 (6.71-29.9) |
| 11p= | 1                                                                       | 0 (0-17.4)       | 1                                                                       | 0 (0-26.1)       | 1                                                                      | 0 (0-48.1)       | 0.41                                                                                   | 0 (0-2.53)       |
| 11q= | 0.17                                                                    | 5.52 (0.14-31.5) | 0.11                                                                    | 8.79 (0.22-50.5) | 0.07                                                                   | 14.1 (0.35-82.3) | 0.00032                                                                                | 5.71 (2.26-12)   |
| 12+  | $8.9 \times 10^{-42}$                                                   | 142 (86.5-225)   | 0.11                                                                    | 8.46 (0.21-48.6) | 0.077                                                                  | 12.8 (0.32-74.9) | $4.8 \times 10^{-35}$                                                                  | 26.9 (18.1-38.9) |
| 12p- | 1                                                                       | 0 (0-431)        | 1                                                                       | 0 (0-769)        | 1                                                                      | 0 (0-1.27e+03)   | 1                                                                                      | 0 (0-66.2)       |
| 12q- | 1                                                                       | 0 (0-263)        | 0.011                                                                   | 98.6 (2.37-628)  | 1                                                                      | 0 (0-680)        | 0.11                                                                                   | 9.2 (0.22-57.4)  |
| 12p= | 1                                                                       | 0 (0-227)        | 1                                                                       | 0 (0-339)        | 1                                                                      | 0 (0-709)        | 1                                                                                      | 0 (0-32.8)       |
| 12q= | 1                                                                       | 0 (0-41.9)       | 1                                                                       | 0 (0-66.9)       | 1                                                                      | 0 (0-128)        | 1                                                                                      | 0 (0-6.27)       |
| 13q- | $1.2 \times 10^{-54}$                                                   | 212 (133-327)    | 1                                                                       | 0 (0-38.4)       | 1                                                                      | 0 (0-56.5)       | $6.1 \times 10^{-33}$                                                                  | 28.9 (19-42.6)   |
| 13q= | $1.4 \times 10^{-11}$                                                   | 49.5 (20.8-102)  | 1                                                                       | 0 (0-34.4)       | 1                                                                      | 0 (0-55.7)       | $4.7 \times 10^{-6}$                                                                   | 7.71 (3.47-14.9) |
| 14+  | 1                                                                       | 0 (0-37.5)       | 1                                                                       | 0 (0-65.2)       | 0.041                                                                  | 24.3 (0.6-144)   | 0.49                                                                                   | 1.5 (0.04-8.55)  |
| 14q- | $2.3 \times 10^{-9}$                                                    | 109 (33.5-276)   | 1                                                                       | 0 (0-139)        | 1                                                                      | 0 (0-215)        | $8.7 \times 10^{-8}$                                                                   | 21.7 (8.31-47.9) |
| 14q= | 1                                                                       | 0 (0-12.2)       | 0.18                                                                    | 5.14 (0.13-29.3) | 1                                                                      | 0 (0-33.6)       | 0.062                                                                                  | 2.4 (0.77-5.67)  |
| 15+  | 0.14                                                                    | 6.8 (0.17-39.4)  | 1                                                                       | 0 (0-47.1)       | 1                                                                      | 0 (0-56.2)       | 0.086                                                                                  | 2.95 (0.6-8.84)  |
| 15q- | 0.011                                                                   | 94.6 (2.21-640)  | 1                                                                       | 0 (0-700)        | 1                                                                      | 0 (0-1.19e+03)   | 0.074                                                                                  | 13.9 (0.33-93.1) |
| 15q= | 1                                                                       | 0 (0-20.1)       | 1                                                                       | 0 (0-31.5)       | 1                                                                      | 0 (0-58)         | 1                                                                                      | 0.81 (0.02-4.54) |
| 16p- | 1                                                                       | 0 (0-73.1)       | 1                                                                       | 0 (0-115)        | 1                                                                      | 0 (0-235)        | 1                                                                                      | 0 (0-10.6)       |
| 16q- | 0.00018                                                                 | 115 (12.9-472)   | 1                                                                       | 0 (0-362)        | 1                                                                      | 0 (0-595)        | 0.0074                                                                                 | 16.9 (1.91-69.5) |
| 16p= | 1                                                                       | 0 (0-32.7)       | 1                                                                       | 0 (0-53)         | 1                                                                      | 0 (0-91.1)       | 0.18                                                                                   | 2.6 (0.31-9.57)  |
| 16q= | 1                                                                       | 0 (0-42.6)       | 0.057                                                                   | 17.4 (0.43-101)  | 1                                                                      | 0 (0-111)        | 0.46                                                                                   | 1.62 (0.04-9.25) |
| 17p- | 1                                                                       | 0 (0-56.2)       | 1                                                                       | 0 (0-91.5)       | 1                                                                      | 0 (0-135)        | 0.083                                                                                  | 4.27 (0.51-16)   |
| 17q- | 1                                                                       | 0 (0-154)        | 1                                                                       | 0 (0-258)        | 1                                                                      | 0 (0-403)        | 0.16                                                                                   | 5.88 (0.14-35.5) |
| 17p= | 1                                                                       | 0 (0-107)        | 1                                                                       | 0 (0-164)        | 1                                                                      | 0 (0-277)        | 1                                                                                      | 0 (0-15.3)       |
| 17q= | 1                                                                       | 0 (0-28.6)       | 1                                                                       | 0 (0-43.8)       | 1                                                                      | 0 (0-80.5)       | 0.6                                                                                    | 1.09 (0.03-6.19) |
| 18+  | $1 \times 10^{-6}$                                                      | 58.9 (15.5-159)  | 1                                                                       | 0 (0-92.3)       | 1                                                                      | 0 (0-145)        | $8.1 \times 10^{-7}$                                                                   | 15.2 (5.91-32.9) |
| 18p- | 1                                                                       | 0 (0-330)        | 1                                                                       | 0 (0-581)        | 1                                                                      | 0 (0-974)        | 0.085                                                                                  | 12.1 (0.28-80.1) |
| 18q= | 1                                                                       | 0 (0-121)        | 1                                                                       | 0 (0-188)        | 1                                                                      | 0 (0-347)        | 1                                                                                      | 0 (0-17.6)       |
| 19+  | 1                                                                       | 0 (0-301)        | 1                                                                       | 0 (0-463)        | 1                                                                      | 0 (0-842)        | 1                                                                                      | 0 (0-42.6)       |
| 19p= | 1                                                                       | 0 (0-61.9)       | 1                                                                       | 0 (0-97)         | 0.023                                                                  | 45.3 (1.11-271)  | 0.35                                                                                   | 2.36 (0.06-13.5) |
| 19q= | 1                                                                       | 0 (0-50.4)       | 0.047                                                                   | 21.1 (0.53-123)  | 0.00034                                                                | 79.7 (9.25-310)  | 0.002                                                                                  | 7.88 (2.1-20.9)  |
| 20q- | 1                                                                       | 0 (0-18.7)       | 1                                                                       | 0 (0-31)         | 0.084                                                                  | 11.7 (0.29-68.4) | 0.053                                                                                  | 2.9 (0.78-7.54)  |
| 20p= | 1                                                                       | 0 (0-235)        | 1                                                                       | 0 (0-361)        | 1                                                                      | 0 (0-812)        | 1                                                                                      | 0 (0-33.6)       |
| 20q= | 0.069                                                                   | 14.2 (0.35-82)   | 1                                                                       | 0 (0-81.8)       | 1                                                                      | 0 (0-158)        | 0.085                                                                                  | 4.19 (0.5-15.6)  |
| 21+  | 1                                                                       | 0 (0-52.9)       | 1                                                                       | 0 (0-87.5)       | 0.028                                                                  | 36.4 (0.89-217)  | 0.38                                                                                   | 2.09 (0.05-12)   |
| 21q- | 1                                                                       | 0 (0-343)        | 1                                                                       | 0 (0-540)        | 1                                                                      | 0 (0-1.09e+03)   | 0.08                                                                                   | 12.8 (0.3-82.9)  |
| 21q= | 1                                                                       | 0 (0-66.2)       | 1                                                                       | 0 (0-101)        | 1                                                                      | 0 (0-173)        | 0.34                                                                                   | 2.46 (0.06-14.2) |
| 22+  | 0.088                                                                   | 11 (0.27-63.2)   | 1                                                                       | 0 (0-71.1)       | 1                                                                      | 0 (0-108)        | 0.00045                                                                                | 8.31 (2.64-20.1) |
| 22q- | $6.4 \times 10^{-16}$                                                   | 188 (75.5-404)   | 0.027                                                                   | 37.8 (0.93-224)  | 1                                                                      | 0 (0-233)        | $2.2 \times 10^{-12}$                                                                  | 34.9 (15.7-69.7) |
| 22q= | 1                                                                       | 0 (0-25.1)       | 1                                                                       | 0 (0-40.5)       | 1                                                                      | 0 (0-63.1)       | 1                                                                                      | 0.96 (0.02-5.4)  |

This table provides results of analogous analyses removing the restrictions we imposed on blood counts (relevant to the cancer(s) analyzed) in our primary analyses (lymphocyte count  $1-3.5 \times 10^9/L$ , red cell count  $<6.1 \times 10^{12}/L$  for males and  $<5.4 \times 10^{12}/L$  for females, platelet count  $<450 \times 10^9/L$ , RDW  $<15\%$ ).

**Supplementary Table 21. Effects of known CLL GWAS variants on mosaic +12 and 13q LOH risk.**

| Locus    | hg19 bp   | Risk allele   | CLL, Law et al. [65] |         | CLL, UK Biobank  |         | Mosaic +12       |         | Mosaic 13q LOH   |         |
|----------|-----------|---------------|----------------------|---------|------------------|---------|------------------|---------|------------------|---------|
|          |           |               | OR (95% CI)          | P       | OR (95% CI)      | P       | OR (95% CI)      | P       | OR (95% CI)      | P       |
| 2p22.2   | 37603801  | rs888096:A    | 1.15 (1.09–1.21)     | 5.2e-08 | 1.02 (0.91–1.14) | 0.74    | 1.04 (0.93–1.16) | 0.54    | 1.08 (0.98–1.18) | 0.12    |
| 2q13     | 111616619 | rs1002015:C   | 1.30 (1.23–1.37)     | 2.2e-23 | 1.18 (1.06–1.32) | 0.003   | 1.15 (1.03–1.29) | 0.016   | 1.15 (1.05–1.27) | 0.003   |
| 2q13     | 111831793 | rs58055674:C  | 1.41 (1.32–1.50)     | 2e-27   | 1.17 (1.02–1.33) | 0.027   | 1.17 (1.02–1.34) | 0.025   | 1.16 (1.03–1.30) | 0.011   |
| 2q13     | 111927379 | rs6708784:G   | 1.30 (1.24–1.37)     | 2.7e-25 | 1.40 (1.25–1.56) | 2.8e-09 | 1.22 (1.10–1.37) | 0.00033 | 1.26 (1.15–1.38) | 1.3e-06 |
| 2q33.1   | 202023949 | rs7558911:A   | 1.18 (1.12–1.24)     | 5.1e-11 | 1.26 (1.13–1.41) | 3.1e-05 | 1.09 (0.98–1.22) | 0.12    | 1.06 (0.97–1.16) | 0.2     |
| 2q37.1   | 231154012 | rs34004493:G  | 1.39 (1.31–1.47)     | 3.7e-32 | 1.40 (1.25–1.57) | 9.9e-09 | 1.30 (1.16–1.46) | 1.1e-05 | 1.33 (1.21–1.47) | 1.2e-08 |
| 2q37.3   | 242294913 | rs3755397:G   | 1.32 (1.22–1.43)     | 9.5e-12 | 1.32 (1.12–1.56) | 0.00081 | 1.14 (0.96–1.36) | 0.14    | 1.12 (0.96–1.29) | 0.14    |
| 3p24.1   | 27777779  | rs9880772:A   | 1.16 (1.11–1.22)     | 1.9e-09 | 1.16 (1.04–1.30) | 0.006   | 1.10 (0.98–1.23) | 0.096   | 1.12 (1.02–1.23) | 0.014   |
| 3q26.2   | 169497585 | rs1317082:A   | 1.19 (1.12–1.26)     | 5.8e-09 | 1.21 (1.06–1.38) | 0.0049  | 1.12 (0.98–1.28) | 0.09    | 1.40 (1.25–1.58) | 1.8e-08 |
| 3q28     | 188128794 | rs73192661:C  | 1.13 (1.07–1.19)     | 1.7e-06 | 1.03 (0.93–1.15) | 0.56    | 1.04 (0.93–1.16) | 0.54    | 1.07 (0.97–1.17) | 0.18    |
| 4q25     | 109025865 | rs7690934:C   | 1.16 (1.11–1.22)     | 6.1e-09 | 1.19 (1.06–1.33) | 0.0024  | 1.19 (1.06–1.33) | 0.0027  | 1.00 (0.91–1.10) | 1       |
| 4q26     | 114698696 | rs1476569:G   | 1.14 (1.08–1.20)     | 4.5e-06 | 1.04 (0.93–1.18) | 0.48    | 1.11 (0.99–1.26) | 0.083   | 1.08 (0.98–1.20) | 0.14    |
| 5p15.33  | 1285974   | rs7705526:A   | 1.18 (1.12–1.25)     | 5.9e-10 | 1.19 (1.06–1.33) | 0.0028  | 1.11 (0.99–1.24) | 0.081   | 1.20 (1.09–1.31) | 0.00025 |
| 5p15.33  | 1321873   | rs10073340:T  | 1.13 (1.06–1.20)     | 0.00028 | 1.21 (1.06–1.39) | 0.006   | 1.15 (1.00–1.33) | 0.045   | 1.13 (1.00–1.27) | 0.044   |
| 6p25.3   | 412802    | rs9392504:A   | 1.33 (1.26–1.40)     | 9.8e-29 | 1.34 (1.20–1.50) | 1.8e-07 | 1.07 (0.96–1.19) | 0.25    | 1.19 (1.08–1.30) | 0.0003  |
| 6p25.2   | 2969278   | rs73718779:T  | 1.14 (1.06–1.23)     | 0.0007  | 1.18 (1.00–1.39) | 0.054   | 1.08 (0.91–1.28) | 0.4     | 1.00 (0.86–1.16) | 0.97    |
| 6p21.32  | 32578127  | rs9271176:G   | 1.29 (1.22–1.36)     | 3.2e-20 | 1.33 (1.18–1.50) | 4.4e-06 | 1.10 (0.98–1.24) | 0.11    | 1.18 (1.07–1.31) | 0.0012  |
| 6p21.31  | 33546930  | rs210143:C    | 1.26 (1.19–1.33)     | 5.8e-16 | 1.01 (0.90–1.14) | 0.81    | 1.22 (1.07–1.38) | 0.0021  | 1.00 (0.91–1.11) | 0.99    |
| 6q25.2   | 154471225 | rs4869818:G   | 1.15 (1.09–1.21)     | 4.1e-08 | 1.16 (1.04–1.29) | 0.0093  | 1.13 (1.01–1.26) | 0.029   | 0.95 (0.87–1.04) | 0.3     |
| 7q31.33  | 124392512 | rs2267708:T   | 1.16 (1.10–1.22)     | 8.6e-09 | 1.12 (1.00–1.24) | 0.047   | 0.98 (0.88–1.10) | 0.74    | 1.12 (1.02–1.23) | 0.015   |
| 8q22.3   | 103577865 | rs2511713:G   | 1.17 (1.10–1.23)     | 6e-08   | 1.14 (1.01–1.28) | 0.032   | 1.16 (1.03–1.31) | 0.016   | 1.11 (1.00–1.23) | 0.046   |
| 8q24.21  | 128200971 | rs2466029:G   | 1.23 (1.17–1.30)     | 7.5e-16 | 1.16 (1.03–1.29) | 0.0098  | 1.10 (0.98–1.23) | 0.091   | 1.09 (0.99–1.19) | 0.081   |
| 9p21.3   | 22206987  | rs1679013:C   | 1.16 (1.10–1.22)     | 2.2e-08 | 1.18 (1.05–1.31) | 0.0038  | 1.12 (1.00–1.25) | 0.05    | 1.21 (1.10–1.33) | 7.4e-05 |
| 10q23.31 | 90752018  | rs6586163:A   | 1.23 (1.17–1.29)     | 1.1e-15 | 1.31 (1.18–1.47) | 9.2e-07 | 1.30 (1.17–1.46) | 3.2e-06 | 1.20 (1.10–1.32) | 8.5e-05 |
| 11p15.5  | 2321650   | rs2651823:A   | 1.18 (1.13–1.25)     | 5.2e-11 | 1.20 (1.07–1.33) | 0.0012  | 0.95 (0.85–1.06) | 0.38    | 1.26 (1.15–1.38) | 6.4e-07 |
| 11q24.1  | 123355391 | rs35923643:G  | 1.63 (1.53–1.72)     | 4.3e-58 | 1.58 (1.40–1.78) | 1.3e-13 | 1.17 (1.02–1.33) | 0.024   | 1.44 (1.30–1.60) | 8e-12   |
| 12q24.13 | 113381376 | rs6489882:G   | 1.16 (1.10–1.22)     | 4.8e-08 | 1.10 (0.98–1.23) | 0.099   | 1.13 (1.01–1.27) | 0.031   | 1.06 (0.97–1.17) | 0.2     |
| 15q15.1  | 40403657  | rs8024033:C   | 1.26 (1.20–1.32)     | 7.1e-19 | 1.32 (1.18–1.47) | 6.9e-07 | 1.19 (1.07–1.33) | 0.0016  | 1.12 (1.02–1.23) | 0.013   |
| 15q21.3  | 56777691  | rs142215530:G | 1.39 (1.29–1.50)     | 2.5e-18 | 1.35 (1.16–1.57) | 0.0001  | 1.36 (1.17–1.59) | 7.9e-05 | 1.26 (1.10–1.43) | 0.00075 |
| 15q23    | 70020525  | rs11637565:G  | 1.35 (1.28–1.42)     | 2e-31   | 1.34 (1.20–1.49) | 1.4e-07 | 1.03 (0.92–1.15) | 0.64    | 1.16 (1.06–1.27) | 0.0019  |
| 15q25.2  | 83237899  | rs17356118:A  | 1.12 (1.05–1.19)     | 0.00025 | 1.06 (0.93–1.21) | 0.38    | 1.10 (0.96–1.26) | 0.16    | 1.08 (0.97–1.21) | 0.18    |
| 16q24.1  | 85973866  | rs305065:C    | 1.16 (1.10–1.22)     | 7.6e-08 | 0.98 (0.88–1.10) | 0.76    | 1.00 (0.89–1.12) | 0.96    | 1.17 (1.06–1.29) | 0.0017  |
| 16q24.1  | 85928621  | rs391855:A    | 1.34 (1.27–1.41)     | 1.3e-28 | 1.28 (1.14–1.43) | 1.7e-05 | 1.17 (1.05–1.31) | 0.0058  | 1.13 (1.03–1.24) | 0.012   |
| 18q21.32 | 57622287  | rs4368253:C   | 1.17 (1.11–1.24)     | 1.3e-08 | 1.11 (0.98–1.25) | 0.091   | 1.21 (1.07–1.37) | 0.002   | 1.00 (0.91–1.10) | 1       |
| 18q21.33 | 60788745  | rs77551289:A  | 1.37 (1.25–1.50)     | 1.8e-11 | 1.26 (1.03–1.53) | 0.026   | 1.15 (0.94–1.40) | 0.17    | 1.18 (1.00–1.39) | 0.049   |
| 18q21.33 | 60793921  | rs4987852:C   | 1.32 (1.20–1.44)     | 4.7e-09 | 1.20 (0.98–1.46) | 0.076   | 1.29 (1.06–1.57) | 0.0099  | 1.13 (0.95–1.34) | 0.17    |
| 19q13.3  | 47176752  | rs874460:C    | 1.24 (1.15–1.34)     | 3.4e-08 | 1.29 (1.08–1.55) | 0.0042  | 0.89 (0.76–1.04) | 0.14    | 1.16 (1.00–1.34) | 0.047   |
| 1p36.11  | 23943735  | rs34676223:C  | 1.19 (1.14–1.25)     | 5e-13   | 1.09 (0.97–1.24) | 0.14    | 0.96 (0.85–1.08) | 0.47    | 1.14 (1.03–1.26) | 0.013   |
| 1q42.13  | 228880296 | rs41271473:G  | 1.19 (1.13–1.26)     | 1.1e-10 | 1.04 (0.91–1.19) | 0.6     | 1.19 (1.03–1.38) | 0.018   | 1.02 (0.91–1.15) | 0.71    |
| 4q24     | 102741002 | rs71597109:C  | 1.17 (1.11–1.22)     | 1.4e-10 | 1.26 (1.11–1.42) | 0.00023 | 1.00 (0.89–1.13) | 0.98    | 1.20 (1.08–1.32) | 0.00065 |
| 4q35.1   | 185254772 | rs57214277:T  | 1.13 (1.08–1.18)     | 3.7e-08 | 1.06 (0.95–1.18) | 0.33    | 1.04 (0.93–1.16) | 0.51    | 1.10 (1.00–1.21) | 0.038   |
| 6p21.31  | 34616322  | rs3800461:C   | 1.20 (1.13–1.28)     | 2e-08   | 1.29 (1.10–1.51) | 0.0013  | 1.27 (1.08–1.49) | 0.0033  | 1.21 (1.06–1.38) | 0.0053  |
| 11q23.2  | 113517203 | rs61904987:T  | 1.24 (1.16–1.32)     | 2.5e-11 | 1.19 (1.02–1.38) | 0.025   | 1.03 (0.88–1.21) | 0.73    | 1.22 (1.07–1.38) | 0.0026  |
| 18q21.1  | 47843534  | rs1036935:A   | 1.15 (1.10–1.21)     | 3.3e-08 | 0.98 (0.86–1.12) | 0.77    | 1.14 (1.00–1.30) | 0.046   | 0.99 (0.89–1.11) | 0.91    |
| 19p13.3  | 4069119   | rs7254272:A   | 1.17 (1.10–1.23)     | 4.7e-08 | 0.96 (0.83–1.11) | 0.58    | 1.00 (0.86–1.15) | 0.97    | 1.10 (0.98–1.24) | 0.099   |
| 22q13.33 | 50971266  | rs140522:T    | 1.15 (1.10–1.20)     | 2.7e-09 | 1.21 (1.08–1.35) | 0.001   | 0.95 (0.84–1.06) | 0.35    | 1.18 (1.08–1.30) | 0.0005  |

For 46 lead CLL-associated variants reported by Law et al. [65], we computed CLL effect size, mosaic +12 effect size, and mosaic 13q LOH (i.e., del(13q) or 13q CN-LOH) effect size in UK Biobank and compared these effect sizes to reported CLL effect size in Law et al. [65]. We computed effect sizes and *P*-values (two-sided) using logistic regression. Details of analyses are provided in Supplementary Note 8.

**Supplementary Table 22. Risk increase for cardiovascular disease (MI/stroke) during 5–10-year follow-up conferred by mCAs.**

| Event              | # carriers | # matched controls | MI/stroke OR (95% CI)   | <i>P</i>      |
|--------------------|------------|--------------------|-------------------------|---------------|
| Any loss           | 2700       | 62100              | 1.16 (0.92–1.47)        | 0.22          |
| Any CN-LOH         | 7020       | 140400             | 0.96 (0.81–1.13)        | 0.68          |
| Any gain           | 1822       | 45550              | 0.72 (0.51–1.02)        | 0.068         |
| Any mCA            | 15015      | 180180             | 0.97 (0.87–1.09)        | 0.67          |
| <i>DNMT3A</i> loss | 107        | 3638               | 1.47 (0.46–4.75)        | 0.46          |
| <i>TET2</i> loss   | 68         | 1428               | 1.24 (0.29–5.28)        | 0.68          |
| <i>JAK2</i> CN-LOH | 291        | 9312               | <b>2.49 (1.47–4.19)</b> | <b>0.0024</b> |

This table provides numerical data plotted in Fig. 3b. The number of controls varies across mosaic events because cases and controls for each event were matched for assessment year, age, sex, smoking, hypertension, BMI, and type 2 diabetes status. The case-control ratio was chosen independently for each event to optimize statistical power. *P*-values, two-sided Fisher’s exact test.

**Supplementary Table 23. Numbers of individuals carrying multiple overlapping CN-LOH mutations on the same chromosome arm.**

| Arm | # of multi-CN-LOH individuals | # carrying high-risk inherited or acquired variants                                                                                                        |
|-----|-------------------------------|------------------------------------------------------------------------------------------------------------------------------------------------------------|
| 1p  | 20                            | 10 (rare inherited <i>MPL</i> variants):<br>rs146249964 splice donor (1), rs28928907 missense (5),<br>rs144210383 missense (1), 454bp exon 10 deletion (3) |
| 2q  | 1                             | 0                                                                                                                                                          |
| 3p  | 1                             | 0                                                                                                                                                          |
| 3q  | 1                             | 0                                                                                                                                                          |
| 4q  | 1                             | 0                                                                                                                                                          |
| 6p  | 4                             | 0                                                                                                                                                          |
| 9p  | 37                            | 32 (common inherited <i>JAK2</i> 46/1 haplotype)                                                                                                           |
| 11q | 2                             | 0                                                                                                                                                          |
| 13q | 14                            | 13 (somatic deletions of <i>DLEU</i> region)                                                                                                               |
| 14q | 7                             | 0                                                                                                                                                          |
| 15q | 17                            | 13 (rare inherited <i>TM2D3</i> variants)<br>70kb whole-gene deletion (12), rs754640606 missense (1)                                                       |
| 16p | 1                             | 0                                                                                                                                                          |
| 17p | 1                             | 0                                                                                                                                                          |
| 17q | 2                             | 0                                                                                                                                                          |
| 19q | 1                             | 0                                                                                                                                                          |
| 20q | 1                             | 0                                                                                                                                                          |
| 21q | 1                             | 0                                                                                                                                                          |
| 22q | 3                             | 0                                                                                                                                                          |

We identified 110 examples of multiple overlapping CN-LOH mutations occurring on the same chromosome arm using the modified hidden Markov model we previously developed and applied to the UK Biobank interim release (described in Supplementary Note 1.8 of ref. [9]). For each affected chromosome arm, we determined which events could be attributed to a high-risk inherited or acquired variant on the affected arm (listed in the third column of this table).
